# Supplementary material for: Photocatalytic reductive radical–radical coupling of N,N′-cyclicazomethine imines with difluorobromo derivatives
Source: Royal Society of Chemistry journal article supplement (doi:10.1039/c8cc09385g), 2019-01-01
Supplement: c8cc09385g1.pdf [file c8cc09385g1.pdf]

## Supporting Information

### Photocatalytic reductive radical-radical coupling of *N*, *N'*-cyclicazomethine imines with difluorobromo derivatives

Peng-Ju Xia,<sup>a,§</sup> Zhi-Peng Ye,<sup>a,§</sup> Dan Song,<sup>a</sup> Ji-Wei Ren,<sup>a</sup> Han-Wen Wu,<sup>a</sup> Jun-An  
Xiao,<sup>c</sup> Hao-Yue Xiang,<sup>\*,a</sup> Xiao-Qing Chen,<sup>\*,a,b</sup> Hua Yang<sup>\*,a,b</sup>

<sup>a</sup>*College of Chemistry and Chemical Engineering, Central South University, Changsha  
410083, P. R. China*

<sup>b</sup>*Key Laboratory of Hunan Province for Water Environment and Agriculture Product Safety,  
Central South University, Changsha 410083, P. R. China*

<sup>c</sup>*College of Chemistry and Materials Science, Guangxi Teachers Education University,  
Nanning 530001, Guangxi, P. R. China*

§ P.-J. X. and Z.-P. Y. contributed equally to this work.

1. General Experimental Methods ..... S2-S4
2. Mechanistic studies ..... S5-S11
3. General procedures and characterization data of compound **1v**, **3a-3x**,  
**4a-4q**, **5** ..... S12-S113
4. X-ray crystallographic data of compound **3a**, **3w** and **3x** .... S116-S118

## 1. General Experimental Methods.

Unless otherwise noted, all the reagents were purchased from commercial suppliers and used without further purification.  $^1\text{H}$  NMR spectra were recorded at 400 MHz. The chemical shifts were recorded in ppm relative to tetramethylsilane and with the solvent resonance as the internal standard. Data were reported as follows: chemical shift, multiplicity (s = singlet, d = doublet, t = triplet, q = quartet, m = multiplet), coupling constants (Hz), integration.  $^{13}\text{C}$  NMR data were collected at 100 MHz with complete proton decoupling. Chemical shifts were reported in ppm from the tetramethylsilane with the solvent resonance as internal standard.  $^{19}\text{F}$  NMR data were collected at 376 MHz with complete proton decoupling. UV-Vis spectra were recorded using a shimadzu UV-2600. Infrared spectra (IR) were measured by FT-IR apparatus. High resolution mass spectroscopy (HRMS) was recorded on TOF MS ES+ mass spectrometer and acetonitrile was used to dissolve the sample. Cyclic Voltammetry (CV) experiments were recorded on a CHI650D Electrochemical workstation. Emission intensities were recorded using Perkin-Elementer LS 55 Fluorescence Spectrometer. Column chromatography was carried out on silica gel (200-300 mesh).

### General procedure A: the synthesis of azomethine imines<sup>1</sup>

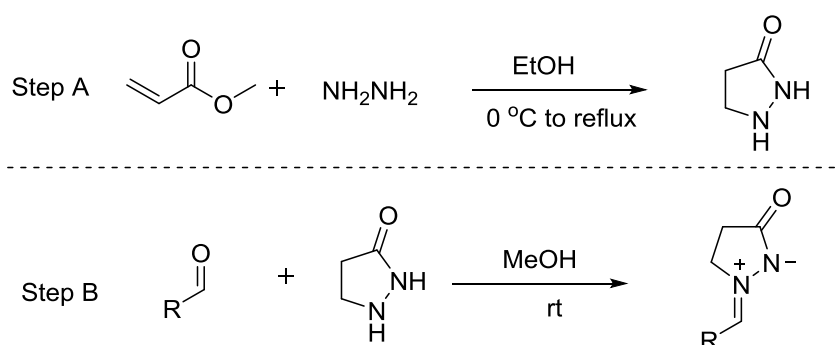

**Step A:** To a mixture of hydrazine monohydrate (100 mmol, 1 eq) in anhydrous EtOH (30 mL) cooled to 0 °C was added methyl acrylate (1000 mmol, 1 eq) dropwise over 5 min. And then the mixture was heated to reflux until the reaction was judged to be complete by TLC analysis. The

resulting solution was concentrated in vacuum and purified by column chromatography on silica gel to give the corresponding product pyrazolidin-3-one as yellow oil (40-60% yield).

**Step B:** The corresponding aldehyde (5 mmol, 1 equiv.) was added to a solution of pyrazolidin-3-one (5 mmol, 1 equiv.) in methanol (2 mL) and the mixture was stirred overnight at room temperature. Thereafter, the precipitate was collected by filtration, washed with a mixed solvent of n-hexane and CH<sub>2</sub>Cl<sub>2</sub> (9:1), and dried under vacuum to afford the desired azomethine imine as a solid (40-70% yield).

### **General procedure B: the synthesis of bromodifluoroamides<sup>2</sup>**

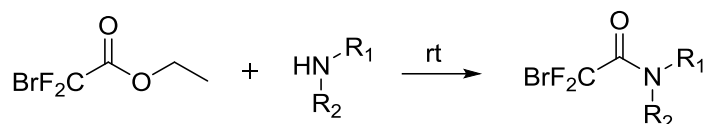

A mixture of amine (10 mmol, 1 equiv.) and bromodifluoroacetate (10 mmol, 1 equiv.) was stirred under air overnight or until the reaction was judged to be complete by TLC analysis. Then, the reaction mixture was purified by column chromatography on silica gel to give the corresponding amide (40%-50% yield).

### **General procedure C: the synthesis of 2-(bromodifluoromethyl)benzoxazole<sup>3</sup>**

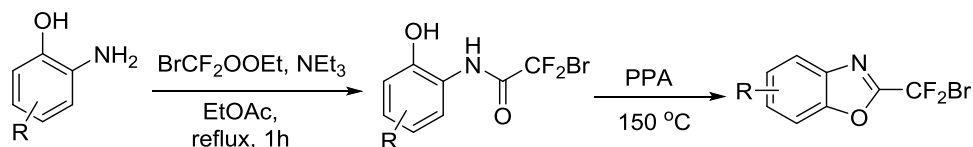

A solution of 2-aminophenol (10 mmol, 1 equiv.), bromodifluoroacetate (10 mmol, 1 equiv.), and Et<sub>3</sub>N (11mmol, 1.1 eq) in EtOAc (15 mL) was heated to reflux for 1 h. After cooling to room temperature, the reaction mixture was washed once with 10 mL HCl (1 M) and then concentrated in vacuum to afford the crude product 2-bromo-2,2-difluoro-N-(2-hydroxyphenyl)acetamide. To this crude product was added polyphosphoric acid (24 mmol, 2.4 eq)

and the obtaining mixture was heated rapidly to 150 °C. After reacting for 1 h, the mixture was allowed to cool to room temperature and ice water (30 mL) and NH<sub>3</sub>.H<sub>2</sub>O (6 mL, 30% aq) were added. The aqueous solution was extracted with CH<sub>2</sub>Cl<sub>2</sub> (50 mL). The organic layer was dried over Na<sub>2</sub>SO<sub>4</sub>, concentrated in vacuum and purified by column chromatography on silica gel to give the corresponding 2-(bromodifluoromethyl)benzoxazole (45-78% yield).

#### **General procedure D: the synthesis of compound 3a-3x and 4a-4q**

*N, N'*-cyclicazomethine imines **1** (0.20 mmol), Cs<sub>2</sub>CO<sub>3</sub> (0.30 mmol, 1.5 eq.) (K<sub>2</sub>HPO<sub>4</sub> for **3x**), Asc-H (0.30mmol, 1.5 eq.) and Ir(ppy)<sub>3</sub> (2.00 mmol%) and BrCF<sub>2</sub>CO<sub>2</sub>Et or bromodifluoroamides **2** (0.60 mmol, 3 eq.) in DMSO (1 mL) were placed in a 5 mL flask and the reaction mixture was stirred at room temperature for 2 h (12h for **3x**) under irradiation of 30 W blue LEDs (distance app. 3 cm). Then, it was diluted with EtOAc (60 mL), and washed with brine (3×20 mL), dried over Na<sub>2</sub>SO<sub>4</sub> and concentrated under reduced pressure. The obtained crude product was then purified by flash chromatography using silica gel (EtOAc/PE = 1:9-1:1).

## 2. Mechanistic studies

### Time profile of the transformation with the light ON/OFF over time<sup>4</sup>

Two standard reactions were set up parallel on a 0.20 mmol scale according to the general procedure D and extra 3 equiv. of benzotrifluoride was added as the internal standard. After being irradiated for 10 min, an aliquot (300  $\mu$ L) from the reaction mixture was transferred into a nuclear magnetic tube charged with 0.5 mL of DMSO-*d*<sub>6</sub>. The yield of product was determined by <sup>19</sup>F NMR. Then the reaction mixture was stirred for 10 min with light-off. All of the following yields were analyzed in the identical way after a 10 min light on or off.

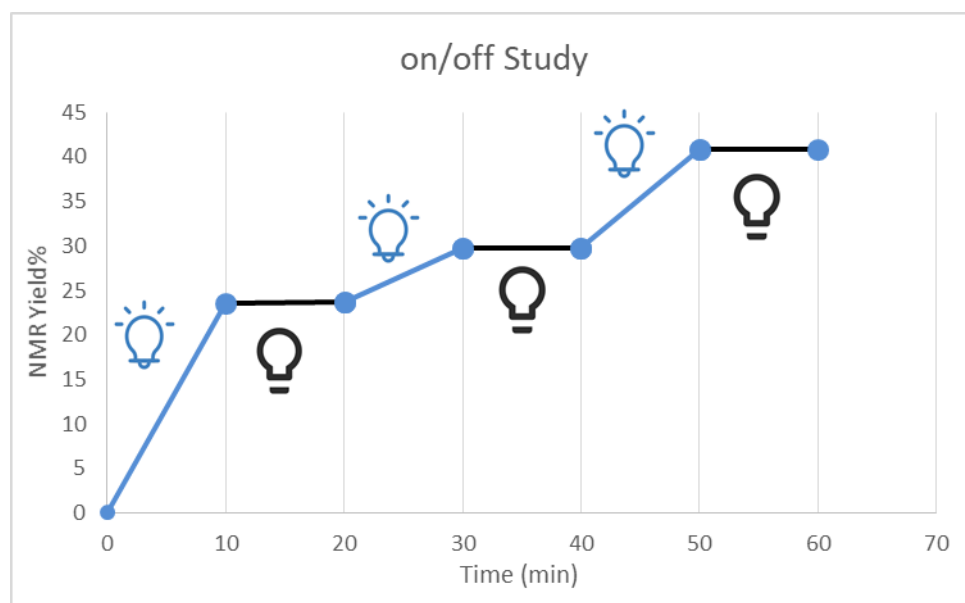

**Figure S1:** Time profile of the transformation with the light ON/OFF over time.

## UV–Vis spectrum of **1a**

The UV–Vis spectrum of **1a** features a maximum absorption ( $\lambda_{\text{max}}$ ) at 351 nm.

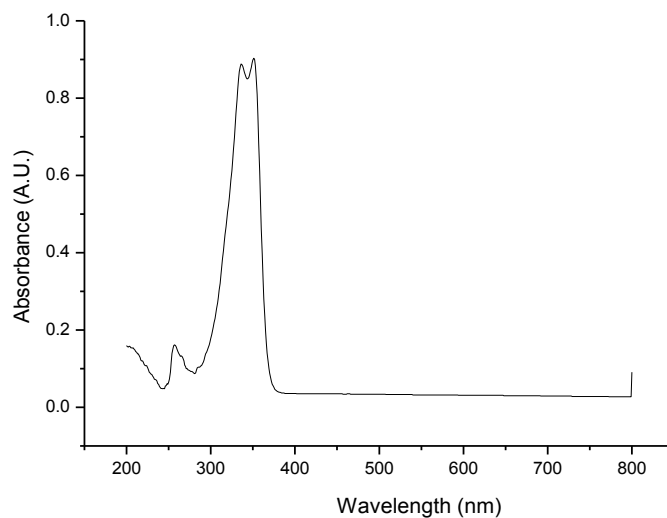

**Figure S2.** Absorbance of  $1 \times 10^{-4}$  M solution of **1a** in DMSO

## Emission Quenching Experiments (Stern–Volmer Studies)

All fluorescence measurements were recorded using a Hitachi FL-7000 Fluorometer. Quenching studies were conducted in  $\text{CH}_3\text{CN}$  and DMSO respectively. All *fac*- $\text{Ir}(\text{ppy})_3$  solutions (concentration of  $5 \mu\text{M}$ ) were excited at 320 nm and the emission intensity was collected at 517 nm. Measurements using corresponding quenchers were taken in triplicate at different concentrations.

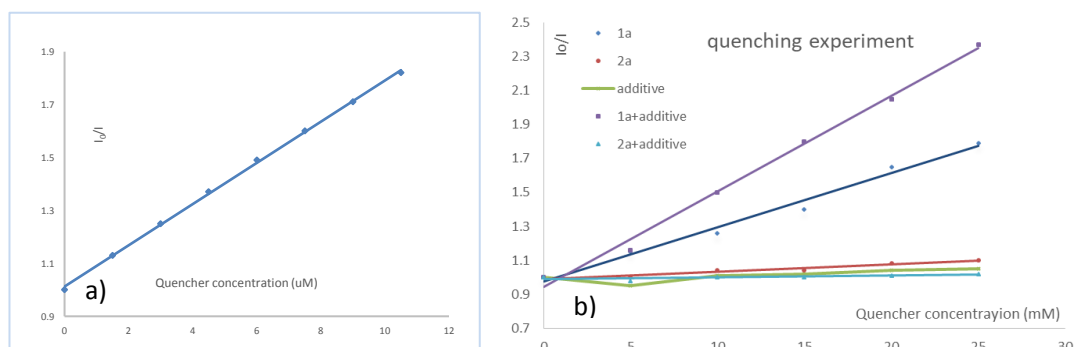

**Figure S3.** Stern-Volmer experiment of **1a** in MeCN b) Stern-Volmer experiments in DMSO

## Cyclic voltammetry<sup>5</sup>

Cyclic Voltammetry was performed using a CHI650D Electrochemical workstation using a glassy carbon working electrode, Ag/AgCl in 3 M NaCl reference electrode, and a platinum counter electrode. The solution for test of **1a** was prepared by dissolving the sample (0.2 mmol) into a 0.1 M solution of tetrabutylammonium hexafluorophosphate (TBAPF<sub>6</sub>) in MeCN (10 mL). Otherwise, Ir(ppy)<sub>3</sub> (0.2 mmol), Asc-H (88.1 mg, 0.5 mmol)/Cs<sub>2</sub>CO<sub>3</sub> (162.9 mg, 0.5 mmol), BrCF<sub>2</sub>COOEt (0.2 mmol) or *N, N'*-cyclicazomethine imines (0.2 mmol) were well dissolved in a 0.1 M (TBAPF<sub>6</sub>) solution in DMSO (ca. 10 mL) respectively for CV study. The potential range scanned was typically -3V and 3V at a 100mV/s.

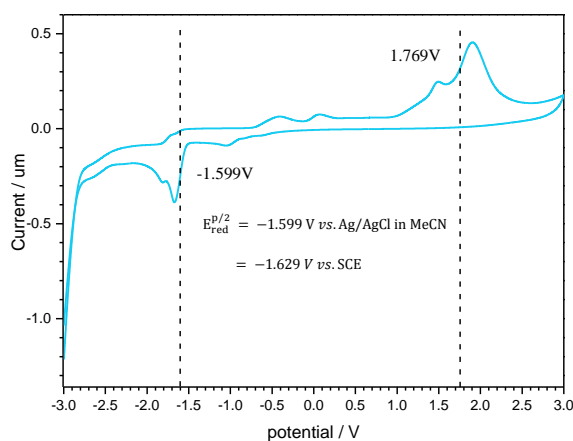

**Figure S3:** CV study of **1a** in MeCN,  $E_{red}^{p/2} = -1.629 \text{ V vs. SCE}$  (the obtained value was referenced to Ag/AgCl and converted to SCE by subtracting 0.03V).

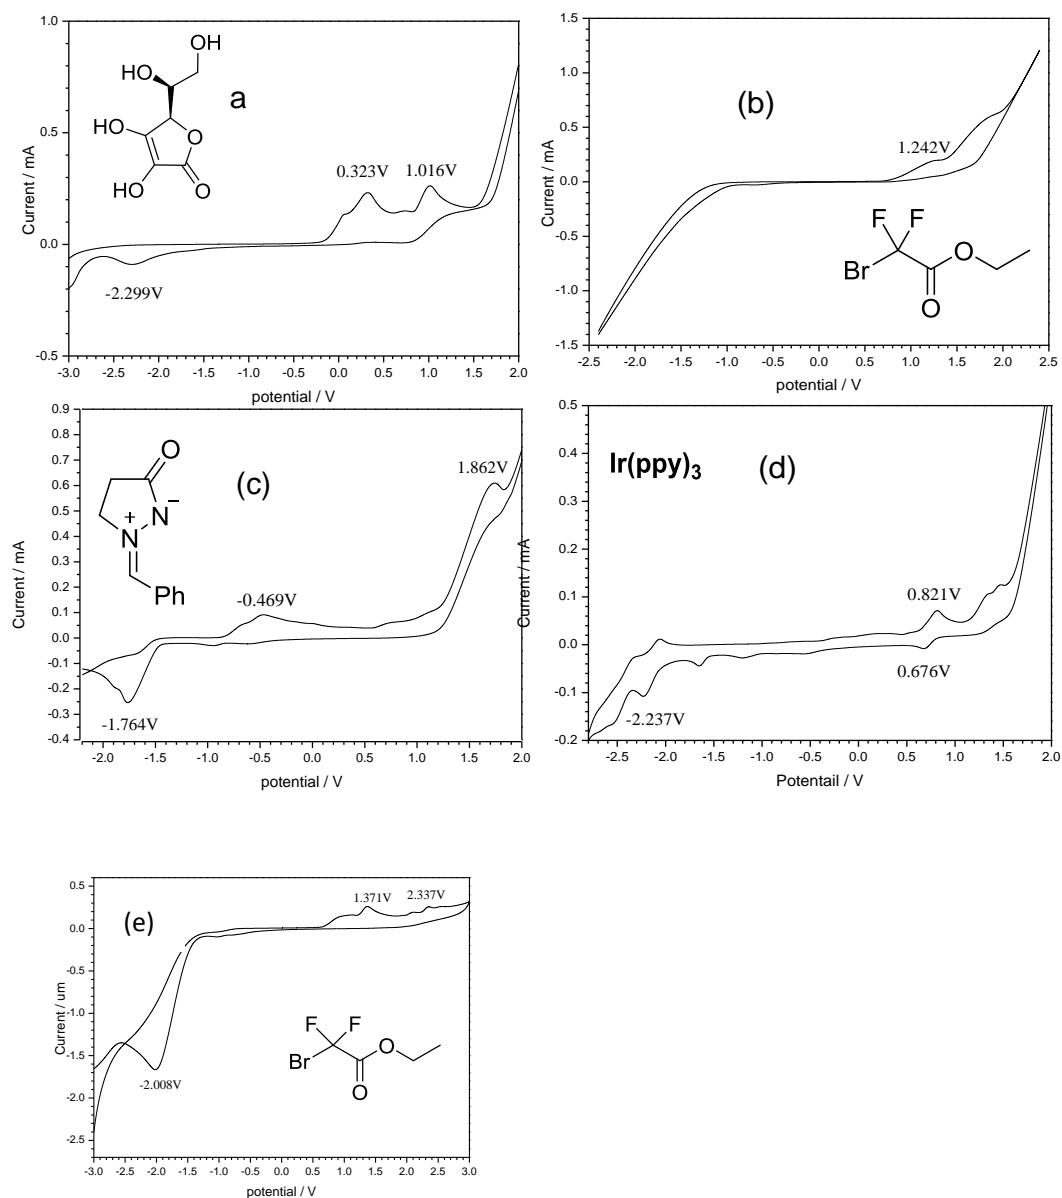

**Figure S4:** CV studies in DMSO for (a) Asc-H +  $\text{Cs}_2\text{CO}_3$ ,  $E_p^C = E_{\text{red}} = -2.30$  V; (b)  $\text{BrCF}_2\text{COOEt}$ ,  $E_p^C = E_{\text{red}} = -2.40$  V (c) *N, N'*-cyclicazomethine imines **1a**,  $E_p^C = E_{\text{red}} = -1.764$  V; (d)  $\text{Ir}(\text{ppy})_3$ ,  $E_p(\text{Ir}^{\text{IV}}/\text{Ir}^{\text{III}}) = 0.68$  V and excited state redox potential was calculated using the Rehm-Weller equation  $E(\text{Ir}^{\text{III}*}/\text{Ir}^{\text{IV}}) = -1.82$  V. CV studies in  $\text{CH}_3\text{CN}$  for (e)  $\text{BrCF}_2\text{CO}_2\text{Et}$ ,  $E_p^C = E_{\text{red}} = -2.01$  V.



## Trapping Experiment

Verification of the formation of an *N, N'*-cyclicazomethine imines **1a** radical generated through oxidative quenching of the photocatalyst and subsequent free-radical coupling with  $\bullet\text{CF}_2\text{COOEt}$ . 3-Pyrazolidinone **1a** radical and  $\bullet\text{CF}_2\text{COOEt}$  were tried respectively *via* the radical-trapping experiment through the addition of TEMPO and BHT (0.6 mmol, 3 eq.).

*N, N'*-Cyclicazomethine imines **1a** (0.20 mmol),  $\text{Cs}_2\text{CO}_3$  (0.30 mmol, 1.5 eq.), Asc-H (0.30 mmol, 1.5 eq.) and  $\text{Ir}(\text{ppy})_3$  (2.00 mmol%) and  $\text{BrCF}_2\text{CO}_2\text{Et}$  **2a** (0.60 mmol, 3 eq.) in DMSO (1 mL) were placed in a 5 mL flask and the reaction mixture was stirred at room temperature for 2 h under irradiation of 30 W blue LEDs (distance app. 3 cm). In order to ensure whether the putative *N, N'*-cyclicazomethine imines **1a** was trapped by TEMPO and  $\bullet\text{CF}_2\text{COOEt}$  was trapped by BHT. ESI-MS analysis of the crude reaction mixture was performed (see Figure S6). The resulting mass spectrum clearly shows a peak corresponding to the coupled product between TEMPO radical and *N, N'*-cyclicazomethine imines **1a** (HRMS (ESI):  $\text{C}_{19}\text{H}_{30}\text{N}_3\text{O}_2^+$   $[\text{M}+\text{H}]^+$  Calcd 332.2333, Found 332.2325) and BHT radical and the expected  $\bullet\text{CF}_2\text{COOEt}$  (HRMS (ESI) :  $\text{C}_{19}\text{H}_{28}\text{F}_2\text{NaO}_3^+$   $[\text{M} + \text{Na}]^+$  Calcd 365.1899, Found 365.1877). Simultaneously, we also observed the dimer of *N, N'*-cyclicazomethine imine **1a** (HRMS (ESI):  $\text{C}_{20}\text{H}_{20}\text{N}_4\text{NaO}_2^+$   $[\text{M}+\text{H}]^+$  Calcd 371.1478, Found 371.1490).

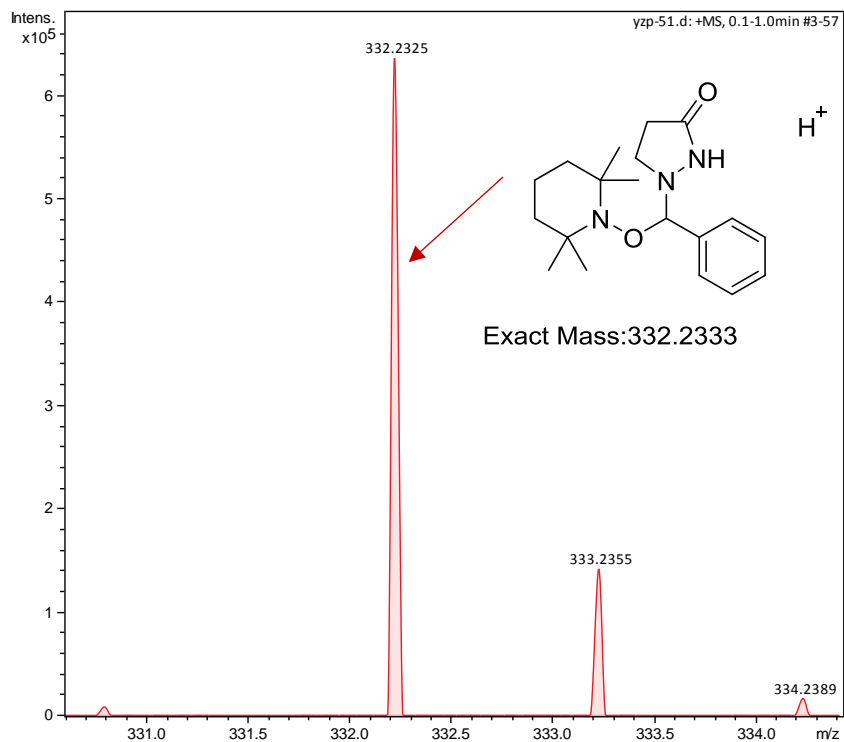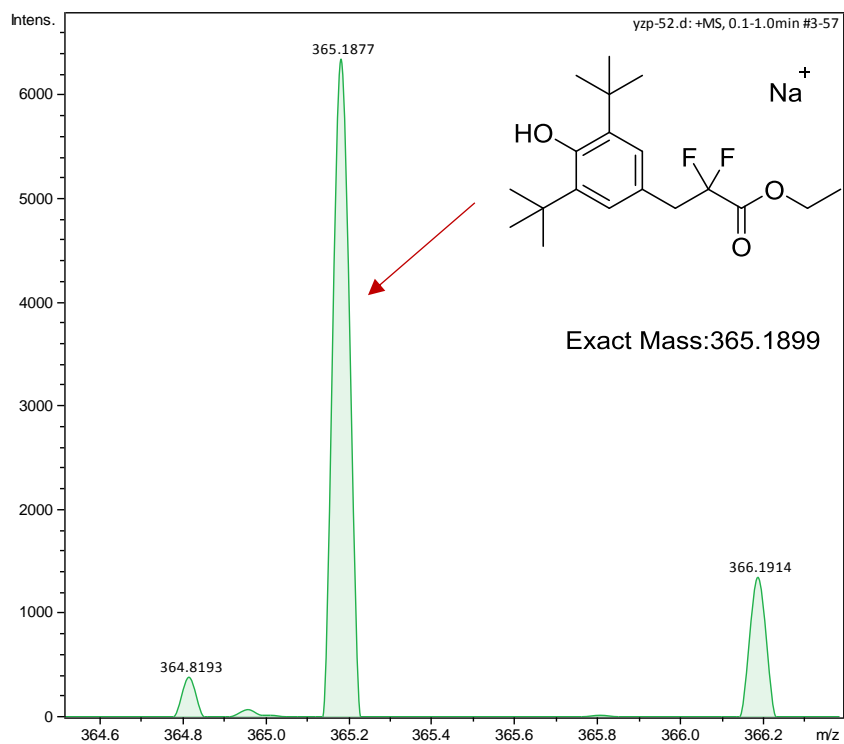

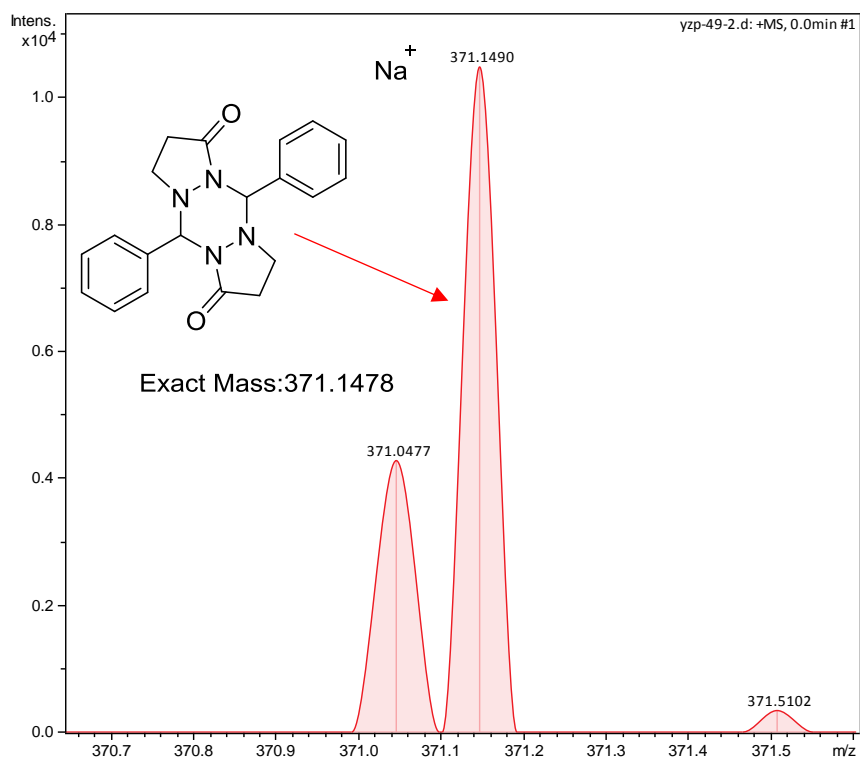

**Figure S5.** Crude ESI-MS of the species **I**, **II** and **C**.

**Ref:**

- [1] (a) H. C. Guo, H. L. Liu, F. L. Zhu, R. S. Na, H. Jiang, Y. Wu, L. Zhang, Z. Li, H. Yu, B. Wang, Y. M. Xiao, X. P. Hu, M. Wang; *Angew. Chem. Int. Ed.* 2013, **52**, 12641; (b) S. E. Winterton, J. M. Ready; *Org. Lett.* 2016, **18**, 2608; (c) S. J. Shen, Y. L. Yang, J. Y. Duan, Z. H. Jia, J. Y. Liang; *Org. Biomol. Chem.*, 2018, **16**, 1068.
- [2] (a) C. P. Chen, R. S. Zeng, J. Y. Zhang, Y. S. Zhao; *Eur. J. Org. Chem.* 2017, **46**, 6947; (b) Atsushi Tarui, S. Shinohara, K. Sato, M. Omote, A. Ando; *Org. Lett.* 2016, **18**, 1128.
- [3] (a) T. Meiresonne, G. Verniest, N. D. Kimpe, S. Mangelinckx; *J. Org. Chem.* 2015, **80**, 5111.
- [4] M. A. Cismesias, T. P. Yoon; *Chem. Sci.* **2015**, **6**, 5426.
- [5] D. Rehm, A. Weller; *Isr. J. Chem.* 1970, **8**, 259.

### 3. Characterization data of compound **1v**, **3a-3x**, **4a-4q**.

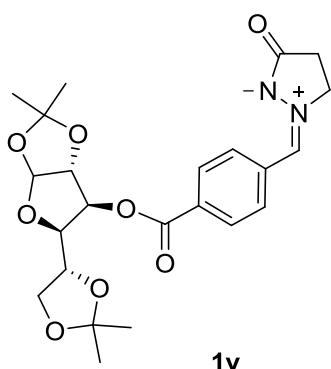

*N, N'*-cyclicazomethine imines **1v**: Pale yellow solid (Yield 50%); m.p. 130-132 °C; IR (KBr)  $\nu$  667, 762, 843, 960, 1069, 1161, 1257 1656, 1719  $\text{cm}^{-1}$ ;  $^1\text{H}$  NMR (400 MHz,  $\text{CDCl}_3$ )  $\delta$  8.38 (d,  $J = 8.4$  Hz, 2H), 8.09 (d,  $J = 8.4$  Hz, 2H), 7.14 (s, 1H), 5.96 (d,  $J = 3.6$  Hz, 1H), 5.50 (d,  $J = 2.4$  Hz, 1H), 4.65 (d,  $J = 3.6$  Hz, 1H), 4.58 (t,  $J = 8.0$  Hz, 3H), 4.31-4.36 (m, 2H), 4.13-4.15 (m, 1H), 4.07-4.10 (m, 1H), 2.86 (t,  $J = 8$  Hz, 2H), 1.56 (s, 3H), 1.42 (s, 3H), 1.33 (s, 3H), 1.27 (s, 3H).  $^{13}\text{C}$  NMR (100 MHz,  $\text{CDCl}_3$ )  $\delta$  185.5, 164.3, 133.3, 131.4, 131.2, 130.7, 129.9, 112.4, 109.5, 105.1, 83.3, 79.9, 77.4, 72.5, 67.3, 58.5, 29.2, 26.8, 26.2, 25.2. HRMS (ESI):  $\text{C}_{23}\text{H}_{28}\text{N}_2\text{NaO}_8^+$   $[\text{M}+\text{Na}]^+$  Calcd 483.1738, Found 483.1727.

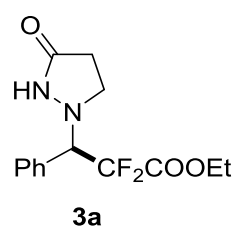

difluorinated 3-pyrazolidinone **3a**: pale yellow solid (52.0 mg, 0.176 mmol, yield 88%); m.p. 108-110 °C; IR (KBr)  $\nu$  650, 735, 822, 1052, 1221, 1369, 1677, 1759, 3188  $\text{cm}^{-1}$ ;  $^1\text{H}$  NMR (400 MHz,  $\text{CDCl}_3$ )  $\delta$  7.66 (*br*, s, 1H), 7.38-7.48 (m, 5H), 4.37 (dd,  $J = 18.0, 10.4$  Hz, 1H), 4.28 (q,  $J = 7.2$  Hz, 2H), 3.45-3.53 (m, 1H), 3.29-3.36 (m, 1H), 2.05-2.13 (m, 1H), 1.83-1.92 (m, 1H), 1.26 (t,  $J = 7.2$  Hz, 3H);  $^{13}\text{C}$  NMR (100 MHz,  $\text{CDCl}_3$ )  $\delta$  175.7, 163.3 (t,  $^2J_{\text{C-F}} = 31.5$  Hz), 130.5, 130.1, 129.8, 128.9, 115.1 (dd,  $^1J_{\text{C-F}} = 256.0, 258.2$  Hz), 72.0 (dd,  $^2J_{\text{C-F}} = 24.5, 20.9$  Hz), 63.23, 51.64, 29.7, 13.8;  $^{19}\text{F}$  NMR (376 MHz,  $\text{CDCl}_3$ )  $\delta$  -108.68 (d,  $J = 260.3$  Hz), -112.35 (d,  $J = 260.7$  Hz); HRMS (ESI):  $\text{C}_{14}\text{H}_{17}\text{F}_2\text{N}_2\text{O}_3^+$   $[\text{M}+\text{H}]^+$  Calcd 299.1202, Found 299.1177.

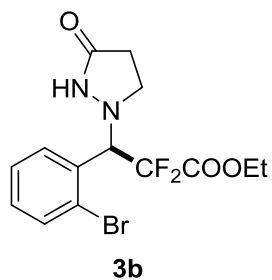

difluorinated 3-pyrazolidinone **3b**: pale yellow solid (60.0 mg, 0.160 mmol, yield 80%); m.p. 112-114 °C; IR (KBr)  $\nu$  650, 725, 967, 1060, 1134, 1305, 1689, 1762, 3182  $\text{cm}^{-1}$ ;  $^1\text{H}$  NMR (400 MHz,  $\text{CDCl}_3$ )  $\delta$  7.66-7.71 (m, 2H), 7.54 (*br s*, 1H), 7.38 (t,  $J = 7.6$  Hz, 1H), 7.27-7.30 (m, 1H), 5.30 (dd,  $J = 18.1, 10.4$  Hz, 1H), 4.24-4.36 (m, 2H), 3.45 (t,  $J = 8.0$  Hz, 2H), 2.21-2.29 (m, 1H), 1.89-1.98 (m, 1H), 1.29 (t,  $J = 7.2$  Hz, 3H);  $^{13}\text{C}$  NMR (100 MHz,  $\text{CDCl}_3$ )  $\delta$  176.1, 163.0 (t,  $^2J_{\text{C-F}} = 31.6$  Hz), 133.4, 131.7, 131.1, 130.3, 128.0, 126.7, 114.9 (dd,  $^1J_{\text{C-F}} = 259.1, 255.5$  Hz), 68.7 (dd,  $^2J_{\text{C-F}} = 24.7, 20.9$  Hz), 63.4, 52.0, 29.8, 13.8;  $^{19}\text{F}$  NMR (376 MHz,  $\text{CDCl}_3$ )  $\delta$  -108.62 (d,  $J = 261.1$  Hz), -111.76 (d,  $J = 261.3$  Hz); HRMS (ESI):  $\text{C}_{14}\text{H}_{16}\text{BrF}_2\text{N}_2\text{O}_3^+$   $[\text{M}+\text{H}]^+$  Calcd 377.0307, Found 377.0328.

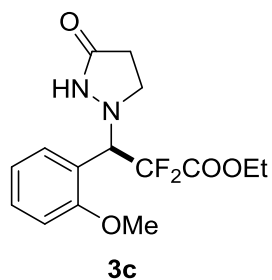

difluorinated 3-pyrazolidinone **3c**: pale yellow solid (65.1 mg, 0.198 mmol, yield 99%); m.p. 101-103 °C; IR (KBr)  $\nu$  644, 730, 799, 1019, 1179, 1229, 1792, 1768, 2921  $\text{cm}^{-1}$ ;  $^1\text{H}$  NMR (400 MHz,  $\text{CDCl}_3$ )  $\delta$  7.48 (d,  $J = 8.0$  Hz, 1H), 7.28-7.33 (m, 2H), 6.87-6.94 (m, 2H), 5.18 (dd,  $J = 20.1, 11.1$  Hz, 1H), 4.21 (q,  $J = 7.2$  Hz, 2H), 3.81 (s, 3H), 3.40-3.49 (m, 1H), 3.29-3.36 (m, 1H), 1.95-2.03 (m, 1H), 1.75-1.83 (m, 1H), 1.18 (t,  $J = 7.2$  Hz, 3H);  $^{13}\text{C}$  NMR (100 MHz,  $\text{CDCl}_3$ )  $\delta$  174.7, 162.5 (t,  $^1J_{\text{C-F}} = 31.5$  Hz), 157.0, 130.1, 129.8, 120.0, 117.4, 114.6 (dd,  $^1J_{\text{C-F}} = 258.0, 255.3$  Hz), 109.8, 62.0, 61.0 ( $^2J_{\text{C-F}} = 24.7, 21.0$  Hz), 54.8, 50.9, 28.9, 12.8;  $^{19}\text{F}$  NMR (376 MHz,  $\text{CDCl}_3$ )  $\delta$  -108.31 (d,  $J = 259.4$  Hz), -111.85 (d,  $J = 260.1$  Hz); HRMS (ESI):  $\text{C}_{15}\text{H}_{19}\text{F}_2\text{N}_2\text{O}_4^+$   $[\text{M}+\text{H}]^+$  Calcd 329.1307, Found 329.1326.

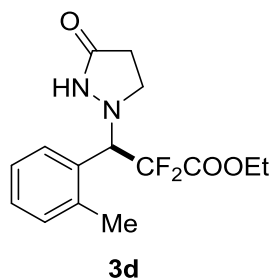

difluorinated 3-pyrazolidinone **3d**: pale yellow solid (46.2 mg, 0.148 mmol, yield 74%); m.p. 111-112 °C; IR (KBr)  $\nu$  653, 732, 887, 1059, 1132, 1203, 1695, 1753, 3125  $\text{cm}^{-1}$ ;  $^1\text{H}$  NMR (400 MHz,  $\text{CDCl}_3$ )  $\delta$  7.54 (d,  $J = 7.6$  Hz, 1H), 7.21-7.30 (m, 3H), 7.05 (*br s*, 1H), 4.72 (t,  $J = 13.2$  Hz, 1H), 4.19-4.27 (m, 2H), 3.29 (t,  $J = 8.0$  Hz, 2H), 2.43 (s, 3H), 2.33-2.41 (m, 1H), 2.12-2.20 (m, 1H), 1.20 (t,  $J = 7.2$  Hz, 3H);  $^{13}\text{C}$  NMR (100 MHz,  $\text{CDCl}_3$ )  $\delta$  175.3, 163.3 (t,  $^2J_{\text{C-F}} = 31.4$  Hz), 137.9, 131.0, 129.5, 129.4, 129.3, 126.6, 115.2 (t,  $^1J_{\text{C-F}} = 257.4$  Hz), 63.3, 51.6, 50.8, 29.8, 20.2, 13.7;  $^{19}\text{F}$  NMR (376 MHz,  $\text{CDCl}_3$ ) -108.37 (d,  $J = 258.3$  Hz), -109.40 (d,  $J = 257.9$  Hz); HRMS (ESI):  $\text{C}_{15}\text{H}_{18}\text{F}_2\text{KN}_2\text{O}_3^+$  [M+K] $^+$  Calcd 351.0917, Found 351.0891.

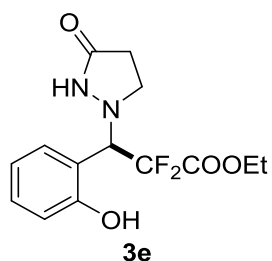

difluorinated 3-pyrazolidinone **3e**: pale brown oil (37.0 mg, 0.118 mmol, yield 59%); IR (KBr)  $\nu$  651, 825, 1056, 1219, 1309, 1457, 1669, 1757, 3125  $\text{cm}^{-1}$ ;  $^1\text{H}$  NMR (400 MHz,  $\text{DMSO-}d_6$ )  $\delta$  10.61 (s, 1H), 9.43 (s, 1H), 7.37 (d,  $J = 7.6$  Hz, 1H), 7.20-7.24 (m, 1H), 6.92 (d,  $J = 8.4$  Hz, 1H), 6.91 (t,  $J = 7.6$  Hz, 1H), 5.20 (dd,  $J = 22.8, 10.4$  Hz, 1H), 4.18-4.29 (m, 2H), 3.58 (t,  $J = 7.2$  Hz, 1H), 1.79-1.99 (m, 2H), 1.65-1.74 (m, 1H), 1.17 (t,  $J = 7.2$  Hz, 3H);  $^{13}\text{C}$  NMR (100 MHz,  $\text{DMSO-}d_6$ )  $\delta$  175.8, 163.5 (t,  $^2J = 31.2$  Hz), 156.9, 131.4, 130.6, 119.3, 117.5, 115.7, 62.1 (dd,  $J_{\text{C-F}} = 24.7, 19.6$  Hz), 61.9, 52.8, 30.0, 14.0;  $^{19}\text{F}$  NMR (376 MHz,  $\text{DMSO-}d_6$ )  $\delta$  -107.69 (d,  $J = 258.2$  Hz), -112.90 (d,  $J = 258.2$  Hz). HRMS (ESI):  $\text{C}_{14}\text{H}_{17}\text{F}_2\text{N}_2\text{O}_4^+$  [M+H] $^+$  Calcd 315.1151, Found 315.1123.

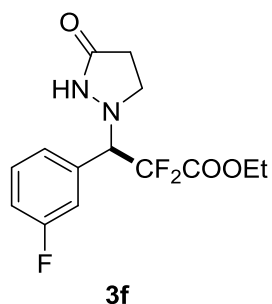

difluorinated 3-pyrazolidinone **3f**: pale yellow oil (30.3 mg, 0.096 mmol, yield 48%); IR (KBr)  $\nu$  657, 803, 1031, 1179, 1226, 1304, 1678, 1720, 2923  $\text{cm}^{-1}$ ;  $^1\text{H}$  NMR (400 MHz,  $\text{CDCl}_3$ )  $\delta$  7.47 (d,  $J = 8.3$  Hz, 2H), 7.33 (*br s*, 1H), 7.11 (t,  $J = 8.4$  Hz, 2H), 4.33-4.40 (m, 1H), 4.30 (q,  $J = 7.2$  Hz,

2H), 3.43- 3.51 (m, 1H), 3.27-3.33 (m, 1H), 2.11-2.22 (m, 1H), 1.87-2.00 (m, 1H), 1.23 (t,  $J = 7.2$  Hz, 3H);  $^{13}\text{C}$  NMR (100 MHz, Chloroform- $d$ )  $\delta$  175.5, 163.6 (d,  $^1J_{\text{C-F}} = 250.1$  Hz), 163.2 (t,  $^2J_{\text{C-F}} = 31.4$  Hz), 132.4 (d,  $^3J_{\text{C-F}} = 8.1$  Hz), 126.0, 116.0 (d,  $^2J_{\text{C-F}} = 21.5$  Hz), 71.3 (dd,  $^2J_{\text{C-F}} = 25.2, 20.8$  Hz), 63.3, 51.7, 29.6, 13.8;  $^{19}\text{F}$  NMR (376 MHz,  $\text{CDCl}_3$ )  $\delta$  -108.22 (d,  $J = 260.9$  Hz), -110.94, -112.95 (d,  $J = 261.3$  Hz). HRMS (ESI):  $\text{C}_{14}\text{H}_{16}\text{F}_3\text{N}_2\text{O}_3^+$   $[\text{M}+\text{H}]^+$  Calcd 317.1108, Found 317.1079.

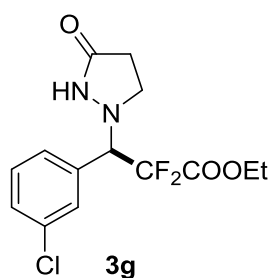

difluorinated 3-pyrazolidinone **3g**: pale yellow oil (41.2 mg, 0.124 mmol, yield 62%); IR (KBr)  $\nu$  694, 788, 1063, 1217, 1302, 1421, 1681, 1723, 2922  $\text{cm}^{-1}$ ;  $^1\text{H}$  NMR (400 MHz,  $\text{CDCl}_3$ )  $\delta$  7.26-7.40 (m, 4H), 4.27-4.34 (m, 1H), 4.24 (q,  $J = 7.2$  Hz, 2H), 3.36-3.42 (m, 1H), 3.24-3.30 (m,

1H), 2.10-2.18 (m, 1H), 1.89-1.97 (m, 1H), 1.22 (t,  $J = 7.2$  Hz, 3H);  $^{13}\text{C}$  NMR (100 MHz,  $\text{CDCl}_3$ )  $\delta$  174.7, 162.1 (t,  $^2J_{\text{C-F}} = 30.8$  Hz), 133.8, 131.2, 129.5, 129.1, 129.0, 127.6, 113.6 (dd,  $^1J_{\text{C-F}} = 259.1, 255.2$  Hz), 70.44 (dd,  $^2J_{\text{C-F}} = 25.7, 20.9$  Hz), 62.4, 50.6, 28.7, 12.8;  $^{19}\text{F}$  NMR (376 MHz,  $\text{CDCl}_3$ )  $\delta$  -107.64 (d,  $J = 262.1$  Hz), -112.90 (d,  $J = 262.0$  Hz). HRMS (ESI):  $\text{C}_{14}\text{H}_{16}\text{ClF}_2\text{N}_2\text{O}_3^+$   $[\text{M}+\text{H}]^+$  Calcd 333.0812, Found 333.0837.

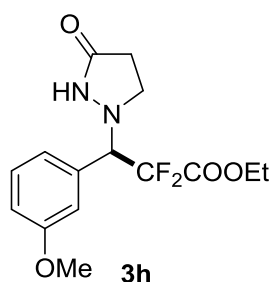

difluorinated 3-pyrazolidinone **3h**: pale yellow solid (45.3 mg, 0.138 mmol, yield 69%); m.p. 103-105  $^\circ\text{C}$ ; IR (KBr)  $\nu$  654, 729, 789, 1055, 1232, 1302, 1680, 1768, 2924  $\text{cm}^{-1}$ ;  $^1\text{H}$  NMR (400 MHz,  $\text{CDCl}_3$ )  $\delta$  7.23 (d,  $J = 8.1$  Hz, 1H), 7.21 (d,  $J = 8.0$  Hz, 1H), 6.88-6.96 (m, 3H), 4.23-

4.28 (m, 1H), 4.22 (q,  $J = 7.2$  Hz, 2H), 3.74 (s, 3H), 3.38-3.45 (m, 1H), 3.23-3.30 (m, 1H), 2.04-2.12 (m, 1H), 1.83-1.92 (m, 1H), 1.20 (t,  $J = 7.2$  Hz, 3H);  $^{13}\text{C}$  NMR (100 MHz,  $\text{CDCl}_3$ )  $\delta$  174.5, 162.4 (t,  $^2J_{\text{C-F}} = 31.6$  Hz), 158.7, 130.6, 128.9, 121.8, 115.3 (dd,  $^1J_{\text{C-F}} = 257.3, 256.0$  Hz), 115.1, 114.2, 71.1 (dd,  $^2J_{\text{C-F}} = 23.9, 21.5$  Hz), 62.2, 54.3, 50.6, 28.7, 12.8.  $^{19}\text{F}$  NMR (376 MHz,  $\text{CDCl}_3$ )  $\delta$

-108.53 (d,  $J = 260.1$  Hz), -111.91 (d,  $J = 260.9$  Hz). HRMS (ESI):  $C_{15}H_{18}F_2N_2NaO_4^+$   $[M+Na]^+$

Calcd 351.1127, Found 351.1121.

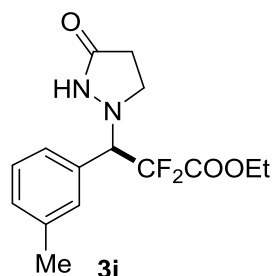

difluorinated 3-pyrazolidinone **3i**: pale yellow solid (46.2 mg, 0.148

mmol, yield 74%); m.p. 85-87 °C; IR (KBr)  $\nu$  657, 713, 781, 1063, 1213,

1302, 1695, 1762, 2930  $cm^{-1}$ ; <sup>1</sup>H NMR (400 MHz, CDCl<sub>3</sub>)  $\delta$  7.40 (*br s*,

1H), 7.22-7.30 (m, 4H), 4.25-4.35 (m, 3H), 3.43-3.51 (m, 1H), 3.28-3.35

(m, 1H), 2.37 (s, 3H), 2.09-2.18 (m, 1H), 1.88-1.97 (m, 1H), 1.26 (t,  $J = 7.2$  Hz, 3H); <sup>13</sup>C NMR (100

MHz, CDCl<sub>3</sub>)  $\delta$  175.5, 163.3 (t, <sup>2</sup> $J_{C-F} = 31.5$  Hz), 138.6, 131.2, 130.5, 130.1, 128.7, 127.5, 115.1 (t,

<sup>1</sup> $J_{C-F} = 256.9$  Hz), 72.2 (dd, <sup>2</sup> $J_{C-F} = 23.7, 21.6$  Hz), 63.2, 51.7, 29.7, 21.4, 13.8; <sup>19</sup>F NMR (376 MHz,

CDCl<sub>3</sub>)  $\delta$  -108.70 (d,  $J = 259.9$  Hz), -111.77 (d,  $J = 260.4$  Hz). HRMS (ESI):  $C_{15}H_{18}F_2NaN_2O_3^+$

$[M+Na]^+$  Calcd 335.1178, Found 335.1159.

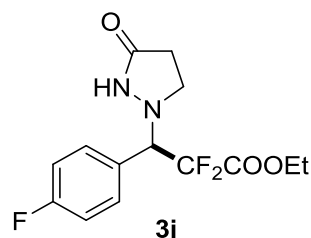

difluorinated 3-pyrazolidinone motif **3j**: pale yellow oil (40.5 mg,

0.128 mmol, yield 64%); IR (KBr)  $\nu$  657, 702, 785, 1063, 1229, 1304,

1693, 1710, 2925  $cm^{-1}$ ; <sup>1</sup>H NMR (400 MHz, CDCl<sub>3</sub>)  $\delta$  7.54 (*br s*, 1H),

7.36-7.41 (m, 1H), 7.21-7.27 (m, 2H), 7.12-7.17 (m, 1H), 4.38 (dd,  $J$

= 18.1, 9.5 Hz, 1H), 4.31 (t,  $J = 7.2$  Hz, 2H), 3.43-3.50 (m, 1H), 3.31-3.37 (m, 1H), 2.14-2.22 (m,

1H), 1.94-2.04 (m, 1H), 1.29 (t,  $J = 6.8$  Hz, 3H); <sup>13</sup>C NMR (100 MHz, CDCl<sub>3</sub>)  $\delta$  175.6, 163.3 (d,

<sup>2</sup> $J_{C-F} = 30.9$  Hz), 162.6 (d, <sup>1</sup> $J_{C-F} = 247.9$  Hz), 132.6 (d, <sup>3</sup> $J_{C-F} = 7.1$  Hz), 130.4 (d, <sup>3</sup> $J_{C-F} = 8.2$  Hz),

126.4, 117.5 (d, <sup>2</sup> $J_{C-F} = 22.4$  Hz), 116.8 (d, <sup>2</sup> $J_{C-F} = 20.9$  Hz), 114.7 (dd, <sup>1</sup> $J_{C-F} = 259.2, 255.5$  Hz),

71.5 (dd, <sup>2</sup> $J_{C-F} = 24.5, 21.3$  Hz), 63.4, 51.6, 29.6, 13.82; <sup>19</sup>F NMR (376 MHz, CDCl<sub>3</sub>)  $\delta$  -107.84 (d,

$J = 261.9$  Hz), -111.43, -112.95 (d,  $J = 262.0$  Hz). HRMS (ESI):  $C_{14}H_{16}F_3N_2O_3^+$   $[M+H]^+$  Calcd

317.1108, Found 317.1078.



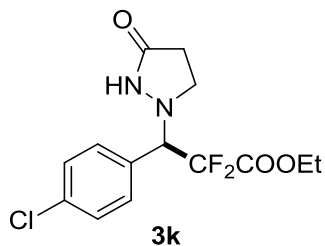

difluorinated 3-pyrazolidinone **3k**: pale yellow solid (36.5 mg, 0.110 mmol, yield 55 %); m.p. 99-101 °C; IR (KBr)  $\nu$  660, 743, 823, 1052, 1181, 1236, 1694, 1755, 2917  $\text{cm}^{-1}$ ;  $^1\text{H}$  NMR (400 MHz,  $\text{CDCl}_3$ )  $\delta$  7.38-7.43 (m, 4H), 7.12 (*br s*, 1H), 4.29-4.38 (m, 3H), 3.43-3.51 (m, 1H), 3.27-3.33 (m, 1H), 2.13-2.20 (m, 1H), 1.89-1.97 (m, 1H), 1.30 (t,  $J = 7.2$  Hz, 3H);  $^{13}\text{C}$  NMR (100 MHz,  $\text{CDCl}_3$ )  $\delta$  175.5, 136.2, 131.8, 129.2, 128.6, 71.5 (dd,  $^2J_{\text{C-F}} = 25.5, 20.7$  Hz), 63.4, 51.8, 29.6, 13.9;  $^{19}\text{F}$  NMR (376 MHz,  $\text{CDCl}_3$ )  $\delta$  -107.70 (d,  $J = 261.2$  Hz), -113.12 (d,  $J = 261.5$  Hz); HRMS (ESI):  $\text{C}_{14}\text{H}_{16}\text{ClF}_2\text{N}_2\text{O}_3^+$   $[\text{M}+\text{H}]^+$  Calcd 333.0812, Found 333.0782.

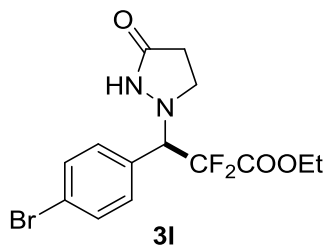

difluorinated 3-pyrazolidinone motif **3l**: pale yellow solid (55.7 mg, 0.146 mmol, yield 73%); m.p. 112-114 °C; IR (KBr)  $\nu$  592, 656, 741, 893, 1051, 1109, 1696, 1746, 2933  $\text{cm}^{-1}$ ;  $^1\text{H}$  NMR (400 MHz,  $\text{CDCl}_3$ )  $\delta$  7.55 (d,  $J = 8.4$  Hz, 2H), 7.35 (d,  $J = 8.4$  Hz, 2H), 7.30 (*br s*, 1H), 4.29-4.37 (m, 3H), 3.43-3.50 (m, 1H), 3.27-3.34 (m, 1H), 2.12-2.20 (m, 1H), 1.89-1.98 (m, 1H), 1.30 (t,  $J = 7.2$  Hz, 3H).  $^{13}\text{C}$  NMR (100 MHz,  $\text{CDCl}_3$ )  $\delta$  175.6, 163.2 (t,  $^2J_{\text{C-F}} = 31.3$  Hz), 132.1, 129.2, 124.4, 71.5 (dd,  $^2J_{\text{C-F}} = 25.4, 20.7$  Hz), 63.4, 51.8, 29.6, 13.9;  $^{19}\text{F}$  NMR (376 MHz,  $\text{CDCl}_3$ )  $\delta$  -107.67 (d,  $J = 261.6$  Hz), -113.25 (d,  $J = 261.8$  Hz). HRMS (ESI):  $\text{C}_{14}\text{H}_{15}\text{BrF}_2\text{KN}_2\text{O}_3^+$   $[\text{M}+\text{K}]^+$  Calcd 414.9866, Found 414.9846.

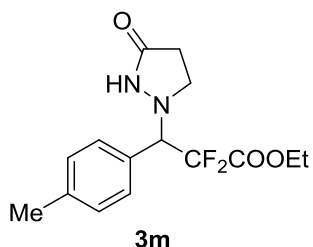

difluorinated 3-pyrazolidinone **3m**: pale yellow solid (45.6 mg, 0.146 mmol, yield 73%); m.p. 111-113 °C; IR (KBr)  $\nu$  653, 731, 826, 1063, 1179, 1228, 1689, 1771, 2934  $\text{cm}^{-1}$ ;  $^1\text{H}$  NMR (400 MHz,  $\text{CDCl}_3$ )  $\delta$  7.27 (d,  $J = 7.6$  Hz, 2H), 7.13 (d,  $J = 8.0$  Hz, 2H), 4.19-4.29 (m, 3H), 3.39-3.46 (m, 1H), 3.21-3.27 (m, 1H), 2.92 (s, 3H), 1.97-2.05 (m, 1H), 1.77-1.85 (m, 1H), 1.20 (t,

$J = 6.8$  Hz, 3H);  $^{13}\text{C}$  NMR (100 MHz,  $\text{CDCl}_3$ )  $\delta$  175.6, 163.2 (t,  $^2J_{\text{C-F}} = 31.3$  Hz), 139.9, 130.4, 129.6, 126.8, 115.2 (t,  $^1J_{\text{C-F}} = 257.0$  Hz), 71.9 (dd,  $^2J_{\text{C-F}} = 25.2, 21.3$  Hz), 63.3, 51.7, 29.8, 21.2, 13.9;  $^{19}\text{F}$  NMR (376 MHz,  $\text{CDCl}_3$ )  $\delta$  -108.53 (d,  $J = 259.6$  Hz), -112.06 (d,  $J = 263.7$  Hz); HRMS (ESI):  $\text{C}_{15}\text{H}_{18}\text{F}_2\text{N}_2\text{NaO}_3^+$   $[\text{M}+\text{Na}]^+$  Calcd 335.1178, Found 335.1189.

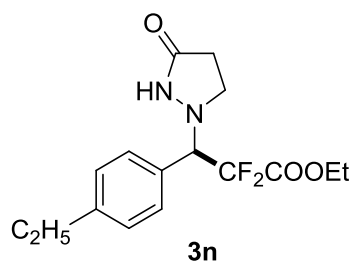

difluorinated 3-pyrazolidinone motif **3n**: pale yellow oil (38.5 mg, 0.118 mmol, yield 59%); IR (KBr)  $\nu$  649, 766, 833, 968, 1130, 1310, 1698, 1753, 2920  $\text{cm}^{-1}$ ;  $^1\text{H}$  NMR (400 MHz,  $\text{CDCl}_3$ )  $\delta$  7.44 (br s, 1H), 7.36 (d,  $J = 8.0$  Hz, 2H), 7.23 (d,  $J = 8.0$  Hz, 2H), 4.26-4.36 (m, 3H), 3.46-3.53 (m, 1H), 3.28-3.34 (m, 1H), 2.60 (q,  $J = 7.6$  Hz, 2H), 2.04-2.12 (m, 1H), 1.83-1.92 (m, 1H), 1.21-1.28 (m, 6H);  $^{13}\text{C}$  NMR (100 MHz,  $\text{CDCl}_3$ )  $\delta$  175.6, 163.4 (t,  $^2J_{\text{C-F}} = 31.5$  Hz), 146.1, 130.5, 128.4, 127.1, 115.2 (t,  $^1J_{\text{C-F}} = 257.2$  Hz), 71.9 (dd,  $^2J_{\text{C-F}} = 23.5, 22.0$  Hz), 63.2, 51.7, 29.7, 28.5, 15.3, 13.8;  $^{19}\text{F}$  NMR (376 MHz, Chloroform- $d$ )  $\delta$  -108.68 (d,  $J = 259.5$  Hz), -112.02 (d,  $J = 260.4$  Hz); HRMS (ESI):  $\text{C}_{16}\text{H}_{21}\text{F}_2\text{N}_2\text{O}_3^+$   $[\text{M}+\text{H}]^+$  Calcd 327.1515, Found 327.1491.

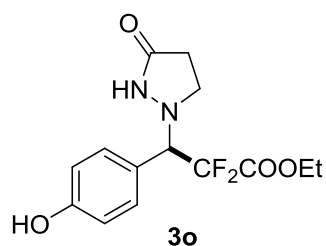

difluorinated 3-pyrazolidinone **3o**: pale yellow solid (37.1 mg, 0.118 mmol, yield 59%); m.p. 162-164  $^\circ\text{C}$ ; IR (KBr)  $\nu$  645, 799, 943, 1015, 1125, 1219, 1678, 1763, 3203  $\text{cm}^{-1}$ ;  $^1\text{H}$  NMR (400 MHz,  $\text{DMSO-}d_6$ )  $\delta$  9.64 (s, 1H), 9.37 (s, 1H), 7.29 (d,  $J = 8.4$  Hz, 2H), 6.76 (d,  $J = 8.8$  Hz, 2H), 4.53 (dd,  $J = 21.6, 10.4$  Hz, 1H), 4.18-4.26 (m, 2H), 3.33-3.38 (m, 2H), 1.72-1.80 (m, 1H), 1.55-1.63 (m, 1H), 1.17 (t,  $J = 6.8$  Hz, 3H).  $^{13}\text{C}$  NMR (100 MHz,  $\text{DMSO}$ )  $\delta$  175.8, 163.5 (t,  $^2J_{\text{C-F}} = 30.7$  Hz), 158.6, 132.5, 121.0, 115.8 (t,  $^1J_{\text{C-F}} = 255.2$  Hz), 115.7, 69.9 (dd,  $^2J_{\text{C-F}} = 24.4, 19.2$  Hz), 63.2, 51.3, 29.9, 14.1;  $^{19}\text{F}$  NMR (376 MHz,  $\text{DMSO-}d_6$ )  $\delta$  -108.06 (d,  $J = 257.8$  Hz), -113.13 (d,  $J = 257.6$  Hz); HRMS (ESI):  $\text{C}_{14}\text{H}_{16}\text{F}_2\text{N}_2\text{NaO}_4^+$   $[\text{M}+\text{Na}]^+$  Calcd 337.0970, Found 337.0995.

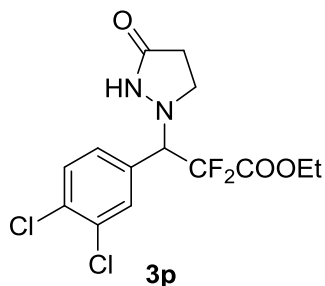

difluorinated 3-pyrazolidinone **3p**: pale yellow oil (62.2 mg, 0.170 mmol, yield 85%); IR (KBr)  $\nu$  669, 718, 1064, 1217, 1300, 1467, 1692, 1710, 2925  $\text{cm}^{-1}$ ;  $^1\text{H}$  NMR (400 MHz,  $\text{CDCl}_3$ )  $\delta$  7.57 (d,  $J = 1.6$  Hz, 1H), 7.50 (d,  $J = 8.4$  Hz, 1H), 7.35 (d,  $J = 8.4$  Hz, 1H), 4.30-4.39 (m, 3H), 3.40-3.47 (m, 1H), 3.29-3.36 (m, 1H), 2.20-2.30 (m, 1H), 2.00-2.08 (m, 1H), 1.32 (t,  $J = 7.2$  Hz, 3H);  $^{13}\text{C}$  NMR (100 MHz,  $\text{CDCl}_3$ )  $\delta$  175.7, 163.0 (dd,  $^2J_{\text{C-F}} = 30.7, 30.4$  Hz), 134.4, 133.1, 132.4, 130.9, 130.5, 129.6, 114.5 (dd,  $^1J_{\text{C-F}} = 259.8, 254.7$  Hz), 70.87 (dd,  $^2J_{\text{C-F}} = 25.9, 20.8$  Hz), 63.6, 51.7, 29.6, 13.9;  $^{19}\text{F}$  NMR (376 MHz,  $\text{CDCl}_3$ )  $\delta$  -106.86 (d,  $J = 263.3$  Hz), -113.60 (d,  $J = 263.2$  Hz); HRMS (ESI):  $\text{C}_{14}\text{H}_{15}\text{Cl}_2\text{F}_2\text{N}_2\text{O}_3^+$  [M+H] $^+$  Calcd 367.0422, Found 367.0402.

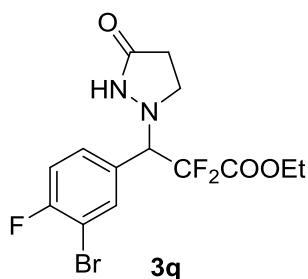

difluorinated 3-pyrazolidinone **3q**: pale yellow oil (67.1 mg, 0.118 mmol, yield 94%); IR (KBr)  $\nu$  666, 721, 827, 1190, 1254, 1302, 1694, 1723, 2927  $\text{cm}^{-1}$ ;  $^1\text{H}$  NMR (400 MHz,  $\text{CDCl}_3$ )  $\delta$  7.68 (d,  $J = 7.4$  Hz, 1H), 7.64 (br s, 1H), 7.43-7.46 (m, 1H), 7.17 (t,  $J = 8.4$  Hz, 1H), 4.30-4.40 (m, 3H), 3.40-3.47 (m, 1H), 3.29-3.36 (m, 1H), 2.21-2.29 (m, 1H), 1.99-2.07 (m, 1H), 1.31 (t,  $J = 6.8$  Hz, 3H);  $^{13}\text{C}$  NMR (100 MHz,  $\text{CDCl}_3$ )  $\delta$  175.8, 163.1 (t,  $^2J_{\text{C-F}} = 31.2$  Hz), 159.9 (d,  $^1J_{\text{C-F}} = 251.3$  Hz), 135.6, 131.2, 127.9, 116.9 (d,  $^2J_{\text{C-F}} = 22.5$  Hz), 114.6 (t,  $^1J_{\text{C-F}} = 259.6$  Hz), 109.6 (d,  $^2J_{\text{C-F}} = 21.2$  Hz), 70.7 (dd,  $^2J_{\text{C-F}} = 26.0, 20.8$  Hz), 63.5, 51.7, 29.6, 13.9;  $^{19}\text{F}$  NMR (376 MHz,  $\text{CDCl}_3$ )  $\delta$  -104.95, -107.22 (d,  $J = 262.8$  Hz), -113.60 (d,  $J = 262.7$  Hz); HRMS (ESI):  $\text{C}_{14}\text{H}_{14}\text{BrF}_3\text{KN}_2\text{O}_3^+$  [M+K] $^+$  Calcd 432.9737, Found 432.9710.

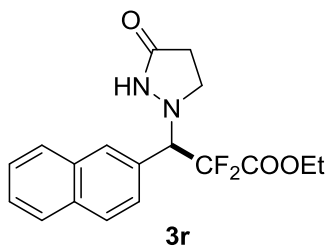

difluorinated 3-pyrazolidinone **3r**: pale yellow oil (29.9 mg, 0.086 mmol, yield 43%); IR (KBr)  $\nu$  746, 800, 1061, 1206, 1293, 1680, 1760, 2922  $\text{cm}^{-1}$ ;  $^1\text{H}$  NMR (400 MHz,  $\text{CDCl}_3$ )  $\delta$  7.93 (br s, 1H),

7.85-7.89 (m, 3H), 7.49-7.59 (m, 4H), 4.53 (dd,  $J = 16.8, 11.2$  Hz, 1H), 4.27 (q,  $J = 7.2$  Hz, 2H), 3.46-3.53 (m, 1H), 3.34-3.41 (m, 1H), 2.10-2.18 (m, 1H), 1.87-1.96 (m, 1H), 1.23 (t,  $J = 7.2$  Hz, 3H);  $^{13}\text{C}$  NMR (100 MHz,  $\text{CDCl}_3$ )  $\delta$  175.5, 163.2 (t,  $^2J_{\text{C-F}} = 31.6$  Hz), 133.6, 130.7, 130.0, 128.7, 128.3, 127.71, 127.68, 127.2, 126.9, 126.7, 113.9 (t,  $^1J_{\text{C-F}} = 257.2$  Hz), 72.9-71.7 (t,  $^2J_{\text{C-F}} = 23.2$  Hz), 63.3, 51.8, 29.7, 13.8;  $^{19}\text{F}$  NMR (376 MHz,  $\text{CDCl}_3$ )  $\delta$  -108.38 (d,  $J = 260.2$  Hz), -111.51 (d,  $J = 260.8$  Hz); HRMS (ESI):  $\text{C}_{18}\text{H}_{18}\text{F}_2\text{N}_2\text{NaO}_3^+$   $[\text{M}+\text{Na}]^+$  Calcd 371.1178, Found 371.1179.

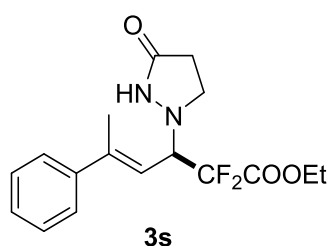

difluorinated 3-pyrazolidinone **3s**: pale yellow oil (29.8 mg, 0.088 mmol, yield 44%); IR (KBr)  $\nu$  698, 746, 1017, 1189, 1296, 1371, 1697, 1762, 2922  $\text{cm}^{-1}$ ;  $^1\text{H}$  NMR (400 MHz,  $\text{CDCl}_3$ )  $\delta$  7.34-7.38 (m, 2H), 7.25-7.30 (m, 3H), 7.03 (*br s*, 1H), 6.65 (s, 1H), 4.31 (q,  $J = 7.2$  Hz, 2H), 3.88 (t,  $J = 12.8$  Hz, 1H), 3.41-3.50 (m, 2H), 2.42-2.60 (m, 2H), 2.00 (s, 3H), 1.31 (t,  $J = 7.2$  Hz, 3H);  $^{13}\text{C}$  NMR (101 MHz,  $\text{CDCl}_3$ )  $\delta$  175.1, 163.3 (t,  $J = 31.6$  Hz), 136.0, 135.5, 129.8, 129.0, 128.4, 127.6, 117.9-112.7 (m), 76.1-75.7 (m), 63.3, 51.2, 29.8, 16.0, 14.0. HRMS (ESI):  $\text{C}_{17}\text{H}_{20}\text{F}_2\text{N}_2\text{NaO}_3^+$   $[\text{M}+\text{Na}]^+$  Calcd 361.1334, Found 361.1356.

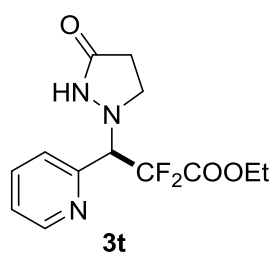

difluorinated 3-pyrazolidinone **3t**: pale yellow solid (41.3 mg, 0.138 mmol, yield 69%); m.p. 104-106  $^\circ\text{C}$ ; IR (KBr)  $\nu$  656, 745, 1055, 1207, 1307, 1371, 1686, 1763, 2927  $\text{cm}^{-1}$ ;  $^1\text{H}$  NMR (400 MHz,  $\text{CDCl}_3$ )  $\delta$  8.58-8.59 (d,  $J = 4.1$  Hz, 1H), 7.71 (td,  $J = 8.0, 1.6$  Hz, 1H), 7.54 (d,  $J = 7.6$  Hz, 1H), 7.30-7.33 (m, 1H), 4.72 (dd,  $J = 20.8, 8.0$  Hz, 1H), 4.24-4.30 (m, 2H), 3.47-3.61 (m, 2H), 1.98-2.06 (m, 1H), 1.69-1.77 (m, 1H), 1.24 (t,  $J = 7.2$  Hz, 3H);  $^{13}\text{C}$  NMR (100 MHz,  $\text{CDCl}_3$ )  $\delta$  175.8, 163.1 (dd,  $^2J_{\text{C-F}} = 32.7, 30.3$  Hz), 151.0, 149.6, 137.1, 125.36 (d,  $^3J_{\text{C-F}} = 3.7$  Hz), 124.4, 114.8 (dd,  $^1J_{\text{C-F}} = 258.1, 254.8$  Hz), 72.9 (dd,  $^2J_{\text{C-F}} = 26.3, 20.1$  Hz), 63.4, 51.9, 29.7, 13.9;  $^{19}\text{F}$  NMR (376

MHz, CDCl<sub>3</sub>)  $\delta$  -107.17 (d,  $J$  = 265.0 Hz), -114.32 (d,  $J$  = 264.9 Hz). HRMS (ESI): C<sub>13</sub>H<sub>16</sub>F<sub>2</sub>N<sub>3</sub>O<sub>3</sub><sup>+</sup> [M+H]<sup>+</sup> Calcd 300.1154, Found 300.1150.

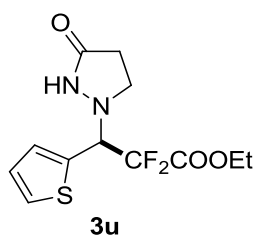

difluorinated 3-pyrazolidinone motif **3u**: pale yellow solid (38.9 mg, 0.128 mmol, yield 64%); m.p. 118-120 °C; IR (KBr)  $\nu$  657, 716, 800, 1012, 1176, 1294, 1675, 1761, 3193 cm<sup>-1</sup>; <sup>1</sup>H NMR (400 MHz, CDCl<sub>3</sub>)  $\delta$  7.40 (d,  $J$  = 5.2 Hz, 1H), 7.17 (d,  $J$  = 4.8 Hz, 1H), 7.02-7.04 (m, 1H), 4.66 (dd,  $J$  = 21.3, 8.1 Hz, 1H), 4.29 (q,  $J$  = 6.8 Hz, 2H), 3.54-3.62 (m, 1H), 3.22-3.29 (m, 1H), 1.90-1.98 (m, 1H), 1.72-1.81 (m, 1H), 1.27 (t,  $J$  = 7.2 Hz, 3H); <sup>13</sup>C NMR (100 MHz, CDCl<sub>3</sub>)  $\delta$  176.0, 163.3 (dd, <sup>2</sup> $J_{C-F}$  = 32.1, 30.3 Hz), 131.1, 128.8, 128.4, 127.2, 114.4 (dd, <sup>1</sup> $J_{C-F}$  = 259.2, 254.6 Hz), 67.4 (dd, <sup>2</sup> $J_{C-F}$  = 27.4, 20.6 Hz), 63.4, 51.6, 29.8, 13.9; <sup>19</sup>F NMR (376 MHz, CDCl<sub>3</sub>)  $\delta$  -106.88 (d,  $J$  = 260.2 Hz), -115.54 (d,  $J$  = 260.2 Hz); HRMS (ESI): C<sub>12</sub>H<sub>14</sub>F<sub>2</sub>N<sub>2</sub>NaO<sub>3</sub>S<sup>+</sup> [M+Na]<sup>+</sup> Calcd 327.0585, Found 327.0555.

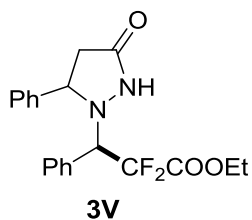

difluorinated 3-pyrazolidinone motif **3v**: pale yellow solid (52.4 mg, 0.140 mmol, yield 70%); m.p. 132-134 °C; IR (KBr)  $\nu$  697, 1058, 1224, 1305, 1370, 1456, 1693, 1750, 2925 cm<sup>-1</sup>; <sup>1</sup>H NMR (400 MHz, CDCl<sub>3</sub>)  $\delta$  7.98 (br s, 1H), 7.43-7.45 (m, 2H), 7.33-7.40 (m, 3H), 7.25-7.30 (m, 3H), 7.19-7.20 (m, 2H), 4.68 (dd,  $J$  = 17.2, 8.9 Hz, 1H), 4.51-4.53 (m, 1H), 4.22-4.28 (m, 2H), 2.72 (dd,  $J$  = 16.8, 8.4 Hz, 1H), 2.22 (dd,  $J$  = 16.8, 2.4 Hz, 1H), 1.21 (t,  $J$  = 7.2 Hz, 3H); <sup>13</sup>C NMR (100 MHz, CDCl<sub>3</sub>)  $\delta$  175.3, 163.5 (t, <sup>2</sup> $J_{C-F}$  = 31.2 Hz), 140.2, 131.4, 130.0, 129.7, 128.9, 128.6, 127.7, 126.3, 114.7 (dd, <sup>1</sup> $J_{C-F}$  = 260.4, 254.2 Hz), 71.7 (dd, <sup>2</sup> $J_{C-F}$  = 24.6, 20.4 Hz), 63.4, 36.0, 13.8; <sup>19</sup>F NMR (376 MHz, CDCl<sub>3</sub>)  $\delta$  -107.13 (d,  $J$  = 262.5 Hz), -112.88 (d,  $J$  = 262.9 Hz); HRMS (ESI): C<sub>20</sub>H<sub>20</sub>F<sub>2</sub>KN<sub>2</sub>O<sub>3</sub><sup>+</sup> [M+K]<sup>+</sup> Calcd 413.1074, Found 413.1048.

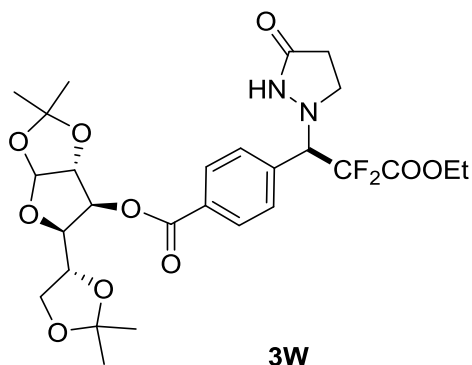

difluorinated 3-pyrazolidinone motifs **3v**: Pale yellow solid (101.8 mg, 0.174 mmol, yield 87%); m.p. 162-164 °C; IR (KBr)  $\nu$  669, 873, 1162, 1215, 1307, 1652, 1683, 1791, 2930  $\text{cm}^{-1}$ ;  $^1\text{H}$  NMR (400 MHz,  $\text{CDCl}_3$ )  $\delta$  8.07 (d,  $J = 8.0$  Hz, 2H), 7.59 (d,  $J = 8.0$  Hz, 2H), 7.53

(br s, 1H), 5.94-5.97 (m, 1H), 5.51 (s, 1H), 4.63 (d,  $J = 3.6$  Hz, 1H), 4.47 (dd,  $J = 18.4, 8.4$  Hz, 1H), 4.30-4.39 (m, 4H), 4.08-4.16 (m, 2H), 3.44-3.51 (m, 1H), 3.31-3.37 (m, 1H), 2.11-2.22 (m, 1H), 1.81-1.98 (m, 1H), 1.56 (s, 3H), 1.42 (s, 3H), 1.33 (s, 3H), 1.26-1.29 (m, 6H);  $^{13}\text{C}$  NMR (100 MHz,  $\text{CDCl}_3$ )  $\delta$  175.7, 164.5, 163.1 (t,  $^2J_{\text{C-F}} = 31.6$  Hz), 135.8, 135.7, 130.8-130.9 (m), 130.0, 112.4, 112.3, 109.5, 109.4, 105.1, 105.0, 83.3, 79.9, 72.5, 72.4, 71.6 (dd,  $^2J_{\text{C-F}} = 25.6, 20.3$  Hz), 67.3 (d,  $J_{\text{C-F}} = 1.0$  Hz), 63.5, 51.8, 51.7, 29.6, 29.5, 26.9, 26.8, 26.7, 26.2, 25.2, 13.9;  $^{19}\text{F}$  NMR (376 MHz,  $\text{CDCl}_3$ )  $\delta$  -106.94 (d,  $J = 263.2$  Hz), -113.50 (d,  $J = 263.2$  Hz); HRMS (ESI):  $\text{C}_{27}\text{H}_{34}\text{F}_2\text{N}_2\text{NaO}_{10}^+$   $[\text{M}+\text{Na}]^+$  Calcd 607.2074, Found 607.2064.

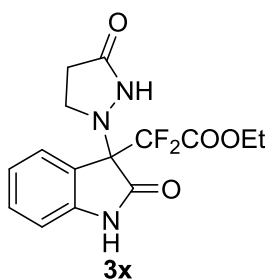

difluorinated 3-pyrazolidinone **3x**: pale yellow solid (40 mg, 0.058 mmol, yield 46%), mp: 170-172 °C; IR (KBr) 627, 731, 953, 1113, 1246, 1367, 1469, 1672, 2918  $\text{cm}^{-1}$ ;  $^1\text{H}$  NMR (400 MHz,  $\text{DMSO-}d_6$ )  $\delta$  10.95 (s, 1H), 9.38 (s, 1H), 7.36-7.39 (m, 2H), 7.04 (t,  $J = 7.6$  Hz, 1H), 6.90 (d,  $J = 8.0$

Hz, 1H), 4.11 (q,  $J = 7.0$  Hz, 2H), 3.55 (t,  $J = 7.6$  Hz, 2H), 1.97-2.61 (m, 2H), 1.03 (t,  $J = 7.2$  Hz, 3H);  $^{13}\text{C}$  NMR (100 MHz,  $\text{DMSO-}d_6$ )  $\delta$  180.5, 175.7, 166.1 (t,  $^2J_{\text{C-F}} = 31.1$  Hz), 148.5, 136.4, 132.4, 127.4, 126.9, 118.9 (t,  $^1J_{\text{C-F}} = 247.4$  Hz), 115.4, 77.3 (t,  $^2J_{\text{C-F}} = 21.2$  Hz), 68.3, 53.6, 35.2, 18.5;  $^{19}\text{F}$  NMR (376 MHz,  $\text{DMSO-}d_6$ )  $\delta$  -108.78 (d,  $J = 258.4$  Hz), -109.92 (d,  $J = 258.2$  Hz); HRMS (ESI):  $\text{C}_{15}\text{H}_{16}\text{F}_2\text{N}_3\text{O}_4^+$   $[\text{M}+\text{H}]^+$  Calcd 340.1103, Found 340.1083.

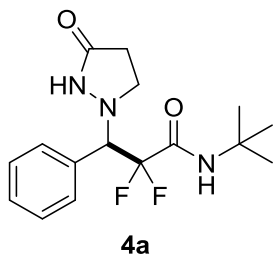

difluorinated 3-pyrazolidinone **4a**: pale yellow solid (26.0 mg, 0.080 mmol, yield 40%); m.p. 179-181 °C; IR (KBr)  $\nu$  650, 701, 822, 1057, 1144, 1229, 1679, 1768, 2924  $\text{cm}^{-1}$ ;  $^1\text{H}$  NMR (400 MHz,  $\text{CDCl}_3$ )  $\delta$  8.59 (br s, 1H), 7.39-7.48 (m, 5H), 6.32 (br s, 1H), 4.45 (t,  $J = 6.4$  Hz, 1H), 3.43-3.50 (m, 1H), 3.28-3.35 (m, 1H), 2.11-2.19 (m, 1H), 1.86-1.95 (m, 1H), 1.26 (s, 9H);  $^{13}\text{C}$  NMR (100 MHz,  $\text{CDCl}_3$ )  $\delta$  175.7, 162.1 (t,  $^2J_{\text{C-F}} = 26.2$  Hz), 131.0, 130.5, 129.5, 128.8, 117.6 (t,  $^1J_{\text{C-F}} = 259.5$  Hz), 71.62 (t,  $^2J_{\text{C-F}} = 22.6$  Hz), 52.1, 51.9, 29.9, 28.1;  $^{19}\text{F}$  NMR (376 MHz,  $\text{CDCl}_3$ )  $\delta$  -109.39 (d,  $J = 253.2$  Hz), -112.06 (d,  $J = 256.4$  Hz); HRMS (ESI):  $\text{C}_{16}\text{H}_{21}\text{F}_2\text{N}_3\text{NaO}_2^+$   $[\text{M}+\text{Na}]^+$  Calcd 348.1494, Found 348.1493.

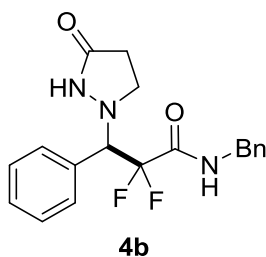

difluorinated 3-pyrazolidinone **4b**: pale yellow solid (62.5 mg, 0.174 mmol, yield 87%); m.p. 143-145 °C; IR (KBr)  $\nu$  610, 741, 1060, 1155, 1365, 1460, 1680, 1771, 2924  $\text{cm}^{-1}$ ;  $^1\text{H}$  NMR (400 MHz,  $\text{DMSO-}d_6$ )  $\delta$  9.37 (s, 1H), 9.09 (t,  $J = 6.0$  Hz, 1H), 7.54 (d,  $J = 7.0$  Hz, 2H), 7.38-7.48 (m, 3H), 7.20-7.29 (m, 3H), 7.12 (d,  $J = 6.9$  Hz, 2H), 4.67 (dd,  $J = 22.4, 10.4$  Hz, 1H), 4.35 (d,  $J = 6.0$  Hz, 2H), 3.39-3.51 (m, 2H), 1.64-1.71 (m, 1H), 1.33-1.42 (m, 1H);  $^{13}\text{C}$  NMR (100 MHz,  $\text{DMSO-}d_6$ )  $\delta$  176.6, 163.7 (t,  $^1J_{\text{C-F}} = 27.5$  Hz), 137.0, 130.8, 130.3, 129.6, 128.8, 128.6, 127.6, 127.5, 119.53, 117.0 (dd,  $^1J_{\text{C-F}} = 261.3, 255.2$  Hz), 71.0 (dd,  $^2J_{\text{C-F}} = 27.2, 19.8$  Hz), 51.8, 43.5, 29.9;  $^{19}\text{F}$  NMR (376 MHz,  $\text{DMSO-}d_6$ )  $\delta$  -107.60 (d,  $J = 253.9$  Hz), -113.36 (d,  $J = 254.1$  Hz); HRMS (ESI):  $\text{C}_{19}\text{H}_{19}\text{F}_2\text{N}_3\text{NaO}_2^+$   $[\text{M}+\text{Na}]^+$  Calcd 382.1338, Found 382.1336.

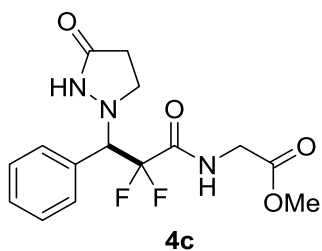

difluorinated 3-pyrazolidinone **4c**: pale yellow solid (67.5 mg, 0.198 mmol, yield 99%); m.p. 122-124 °C; IR (KBr)  $\nu$  655, 747, 987, 1207, 1366, 1669, 1699, 1730, 2924  $\text{cm}^{-1}$ ;  $^1\text{H}$  NMR (400 MHz,  $\text{CDCl}_3$ )  $\delta$

8.80 (*br s*, 1H), 7.63 (*br s*, 1H), 7.50-7.51 (m, 2H), 7.40-7.42 (m, 3H), 4.52 (dd,  $J = 21.9, 7.8$  Hz, 1H), 4.07 (d,  $J = 4.8$  Hz, 2H), 3.75 (s, 3H), 3.51-3.58 (m, 1H), 3.29-3.35 (m, 1H), 2.01-2.08 (m, 1H), 1.73-1.81 (m, 1H);  $^{13}\text{C}$  NMR (101 MHz,  $\text{CDCl}_3$ )  $\delta$  176.6, 169.3, 163.9 (t,  $^2J_{\text{C-F}} = 28.4$  Hz), 130.6, 130.3, 129.6, 128.8, 116.5 (dd,  $^1J_{\text{C-F}} = 261.2, 254.7$  Hz), 71.3 (dd,  $^2J_{\text{C-F}} = 27.1, 19.9$  Hz), 52.6, 51.9, 41.1, 29.9;  $^{19}\text{F}$  NMR (376 MHz,  $\text{CDCl}_3$ )  $\delta$  -105.12 (d,  $J = 262.5$  Hz), -116.13 (d,  $J = 258.3$  Hz); HRMS (ESI):  $\text{C}_{15}\text{H}_{17}\text{F}_2\text{N}_3\text{NaO}_4^+$   $[\text{M}+\text{Na}]^+$  Calcd 364.1079, Found 364.1076.

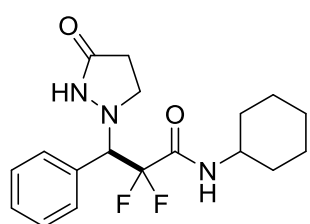

**4d**

difluorinated 3-pyrazolidinone **4d**: pale yellow solid (56.9 mg, 0.162 mmol, yield 81%); m.p. 165-167 °C; IR (KBr)  $\nu$  656, 789, 1056, 1149, 1231, 1303, 1680, 1769, 2923  $\text{cm}^{-1}$ ;  $^1\text{H}$  NMR (400 MHz,  $\text{CDCl}_3$ )  $\delta$  8.38 (*br s*, 1H), 7.48 (d,  $J = 6.8$  Hz, 2H), 7.36-7.42 (m, 3H), 6.56 (*br s*, 1H), 4.46 (dd,  $J = 17.2, 12.0$  Hz 1H), 3.68-3.76 (m, 1H), 3.45-3.52 (m, 1H), 3.28-3.34 (m, 1H), 2.09-2.16 (m, 1H), 1.83-1.91 (m, 2H), 1.57-1.71 (m, 4H), 1.28-1.38 (m, 2H), 1.10-1.16 (m, 2H), 0.95-1.05 (m, 1H);  $^{13}\text{C}$  NMR (100 MHz,  $\text{CDCl}_3$ )  $\delta$  175.8, 162.2 (t,  $^2J_{\text{C-F}} = 27.0$  Hz), 130.9, 130.5, 129.5, 128.8, 116.6 (t,  $^1J_{\text{C-F}} = 261.4$  Hz), 72.1 (t,  $^2J_{\text{C-F}} = 22.9$  Hz), 51.8, 48.7, 32.3, 30.0, 25.3, 24.7, 24.6;  $^{19}\text{F}$  NMR (376 MHz,  $\text{CDCl}_3$ )  $\delta$  -108.52 (d,  $J = 253.0$  Hz), -113.29 (d,  $J = 260.4$  Hz); HRMS (ESI):  $\text{C}_{18}\text{H}_{23}\text{F}_2\text{N}_3\text{NaO}_2^+$   $[\text{M}+\text{Na}]^+$  Calcd 374.1651, Found 374.1652.

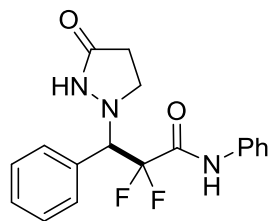

**4e**

difluorinated 3-pyrazolidinone motif **4e**: pale yellow solid (62.1 mg, 0.180 mmol, yield 90%); m.p. 175-177 °C; IR (KBr)  $\nu$  651, 751, 1059, 1137, 1219, 1551, 1686, 1712, 2920  $\text{cm}^{-1}$ ;  $^1\text{H}$  NMR (400 MHz,  $\text{DMSO-}d_6$ )  $\delta$  10.28 (s, 1H), 9.49 (s, 1H), 7.59-7.65 (m, 4H), 7.43-7.45 (m, 3H), 7.36-7.39 (m, 2H), 7.15-7.19 (m, 1H), 4.76 (dd,  $J = 24.4, 7.6$  Hz, 1H), 3.42-3.46 (m, 2H), 1.66-1.73 (m, 1H), 1.35-1.41 (m, 1H);  $^{13}\text{C}$  NMR (100 MHz,  $\text{DMSO-}d_6$ )  $\delta$  175.75, 162.1 (t,  $^2J_{\text{C-F}} = 28.2$  Hz),



137.6, 131.5, 131.3, 129.5, 129.3, 128.8, 125.4, 121.2, 69.9 (dd,  $^2J_{C-F} = 27.2, 18.9$  Hz), 55.5, 29.9;  
 $^{19}\text{F}$  NMR (376 MHz, DMSO- $d_6$ )  $\delta$  -105.03 (d,  $J = 254.7$  Hz), -114.50 (d,  $J = 254.8$  Hz); HRMS  
 (ESI):  $\text{C}_{18}\text{H}_{17}\text{F}_2\text{N}_3\text{NaO}_2^+$   $[\text{M}+\text{Na}]^+$  Calcd 368.1181, Found 368.1181.

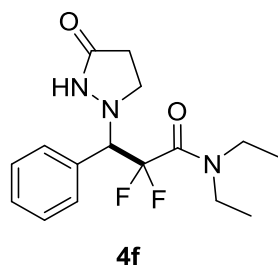

difluorinated 3-pyrazolidinone **4f**: pale yellow oil (55.9 mg, 0.172 mmol,  
 yield 86%); IR (KBr)  $\nu$  652, 702, 802, 969, 1043, 1181, 1643, 1698, 2924  
 $\text{cm}^{-1}$ ;  $^1\text{H}$  NMR (400 MHz,  $\text{CDCl}_3$ )  $\delta$  7.56 (*br s*, 1H), 7.45-7.47 (m, 2H),  
 7.37-7.39 (m, 3H), 4.59 (dd,  $J = 15.5, 11.6$  Hz, 1H), 3.30-3.41 (m, 4H),  
 3.23-3.28 (m, 1H), 3.12-3.19 (m, 1H), 2.12-2.22 (m, 1H), 1.97-2.07 (m, 1H), 1.13 (t,  $J = 7.2$  Hz,  
 3H), 1.07 (t,  $J = 7.2$  Hz, 3H);  $^{13}\text{C}$  NMR (101 MHz,  $\text{CDCl}_3$ )  $\delta$  174.8, 161.9 (t,  $^2J_{C-F} = 27.7$  Hz), 131.3,  
 130.5, 129.4, 128.7, 117.5 (t,  $^1J_{C-F} = 260.8$  Hz), 72.7 (dd,  $^2J_{C-F} = 23.4, 21.0$  Hz), 51.7, 42.3, 42.2 (t,  
 $^3J_{C-F} = 6.8$  Hz), 29.9, 14.5, 12.1;  $^{19}\text{F}$  NMR (376 MHz,  $\text{CDCl}_3$ )  $\delta$  -101.23 (d,  $J = 272.5$  Hz), -104.14  
 (d,  $J = 272.3$  Hz); HRMS (ESI):  $\text{C}_{16}\text{H}_{21}\text{F}_2\text{N}_3\text{NaO}_2^+$   $[\text{M}+\text{Na}]^+$  Calcd 348.1494, Found 348.1470.

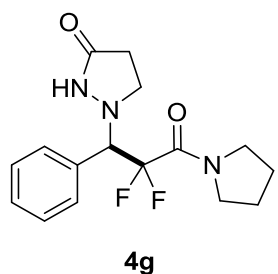

difluorinated 3-pyrazolidinone **4g**: pale yellow solid (47.8 mg, 0.148  
 mmol, yield 74%); m.p. 151-153  $^\circ\text{C}$ ; IR (KBr)  $\nu$  644, 741, 822, 1052,  
 1122, 1446, 1630, 1695, 3310  $\text{cm}^{-1}$ ;  $^1\text{H}$  NMR (400 MHz,  $\text{CDCl}_3$ )  $\delta$  7.48-  
 7.50 (m, 2H), 7.39-7.42 (m, 3H), 4.50 (t,  $J = 12.4$  Hz, 1H), 3.43-3.56 (m,  
 2H), 3.31-3.42 (m, 3H), 3.20-3.21 (m, 1H), 2.23-2.31 (m, 1H), 2.05-2.14 (m, 1H), 1.70-1.83 (m,  
 4H);  $^{13}\text{C}$  NMR (100 MHz,  $\text{CDCl}_3$ )  $\delta$  174.7, 161.2 (t,  $^2J_{C-F} = 28.4$  Hz), 131.4, 130.3, 129.5, 128.7,  
 117.1 (t,  $^1J_{C-F} = 261.2$  Hz), 72.6 (t,  $^2J_{C-F} = 22.3$  Hz), 51.7, 47.9, 46.9 (dd,  $^3J_{C-F} = 7.8, 6.0$  Hz), 29.8,  
 26.5, 23.1;  $^{19}\text{F}$  NMR (376 MHz,  $\text{CDCl}_3$ )  $\delta$  -103.13 (d,  $J = 268.0$  Hz), -105.64 (d,  $J = 267.9$  Hz);  
 HRMS (ESI):  $\text{C}_{16}\text{H}_{19}\text{F}_2\text{N}_3\text{NaO}_2^+$   $[\text{M}+\text{Na}]^+$  Calcd 346.1338, Found 346.1340.

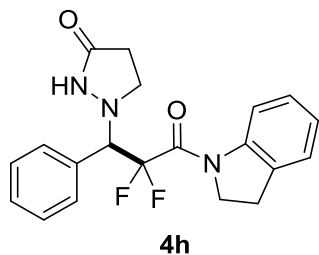

difluorinated 3-pyrazolidinone **4h**: pale yellow solid (73.5 mg, 0.198 mmol, yield 99%); m.p. 164-166 °C; IR (KBr)  $\nu$  646, 763, 863, 1030, 1140, 1174, 1661, 1698, 3201  $\text{cm}^{-1}$ ;  $^1\text{H}$  NMR (400 MHz,  $\text{CDCl}_3$ )  $\delta$  8.20 (d,  $J = 8.0$  Hz, 1H), 7.49-7.51 (m, 3H), 7.37-7.41 (m, 3H), 7.19-7.24 (m, 2H), 7.10 (t,  $J = 7.2$  Hz, 1H), 4.65 (dd,  $J = 15.5, 11.0$  Hz, 1H), 4.03-4.09 (m, 1H), 3.89-3.96 (m, 1H), 3.38 (t,  $J = 7.6$  Hz, 2H), 3.04 (t,  $J = 8.4$  Hz, 2H), 2.16-2.24 (m, 1H), 1.99-2.08 (m, 1H);  $^{13}\text{C}$  NMR (100 MHz,  $\text{CDCl}_3$ )  $\delta$  174.9, 160.6 (t,  $^2J_{\text{C-F}} = 28.9$  Hz), 142.4, 131.6, 131.2, 130.5, 129.5, 128.8, 127.6, 125.4, 124.6, 118.4, 72.5 (dd,  $^2J_{\text{C-F}} = 23.4, 21.0$  Hz), 51.8, 48.2-48.4 (m), 29.9, 28.6;  $^{19}\text{F}$  NMR (376 MHz,  $\text{CDCl}_3$ )  $\delta$  -101.82 (d,  $J = 272.7$  Hz), -106.27 (d,  $J = 272.7$  Hz); HRMS (ESI):  $\text{C}_{20}\text{H}_{19}\text{F}_2\text{N}_3\text{NaO}_2^+$  [ $\text{M}+\text{Na}$ ] $^+$  Calcd 394.1338, Found 394.1334.

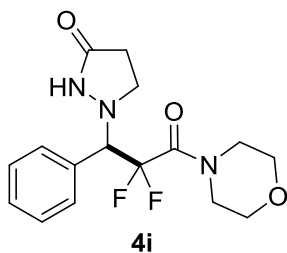

difluorinated 3-pyrazolidinone **4i**: pale yellow solid (38.0 mg, 0.112 mmol, yield 56%); m.p. 164-166 °C; IR (KBr)  $\nu$  696, 749, 847, 965, 1067, 1112, 1623, 1729, 2921  $\text{cm}^{-1}$ ;  $^1\text{H}$  NMR (400 MHz,  $\text{CDCl}_3$ )  $\delta$  7.38-7.46 (m, 5H), 4.09 (dd,  $J = 20.7, 15.3$  Hz, 1H), 3.60-3.67 (m, 6H), 3.36-3.46 (m, 2H), 3.06 (t,  $J = 5.2$  Hz, 2H), 2.53-2.70 (m, 2H);  $^{13}\text{C}$  NMR (100 MHz,  $\text{CDCl}_3$ )  $\delta$  170.2, 158.6 (t,  $^2J_{\text{C-F}} = 29.6$  Hz), 129.6, 129.1, 128.8, 115.1 (t,  $^1J_{\text{C-F}} = 260.3$  Hz), 73.4 (t,  $^2J_{\text{C-F}} = 22.6$  Hz), 66.7, 66.3, 52.1, 45.9, 42.2, 32.9;  $^{19}\text{F}$  NMR (376 MHz,  $\text{CDCl}_3$ )  $\delta$  -115.32 (d,  $J = 253.1$  Hz), -116.49 (d,  $J = 269.7$  Hz); HRMS (ESI):  $\text{C}_{16}\text{H}_{19}\text{F}_2\text{N}_3\text{NaO}_3^+$  [ $\text{M}+\text{Na}$ ] $^+$  Calcd 362.1287, Found 362.1281.

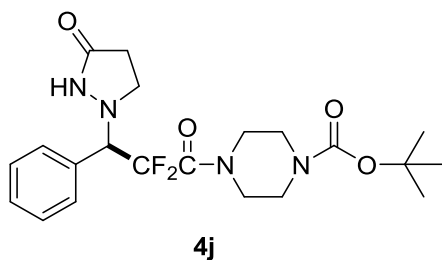

difluorinated 3-pyrazolidinone **4j**: pale yellow solid (81.0 mg, 0.186 mmol, yield 93%); m.p. 143-145 °C; IR (KBr)  $\nu$  657, 869, 1058, 1173, 1245, 1419, 1654, 1683, 2923  $\text{cm}^{-1}$ ;  $^1\text{H}$  NMR (400 MHz,  $\text{CDCl}_3$ )  $\delta$  7.45-7.47 (m, 2H), 7.38-

7.42 (m, 3H), 4.57 (dd,  $J = 10.9, 16.6$  Hz, 1H), 3.62-3.64 (m, 1H), 3.32-3.53 (m, 8H), 3.23-3.28 (m, 1H), 2.10-2.20 (m, 1H), 1.98-2.04 (m, 1H), 1.46 (s, 9H);  $^{13}\text{C}$  NMR (100 MHz,  $\text{CDCl}_3$ )  $\delta$  175.0, 161.4 (t,  $^2J_{\text{C-F}} = 28.1$  Hz), 154.4, 130.9, 130.6, 129.5, 128.8, 118.2 (t,  $^1J_{\text{C-F}} = 259.3$  Hz), 80.5, 72.5 (dd,  $^2J_{\text{C-F}} = 23.4, 20.0$  Hz), 51.8, 45.8, 43.5, 29.9, 29.7, 28.3, 22.7, 14.1;  $^{19}\text{F}$  NMR (376 MHz,  $\text{CDCl}_3$ )  $\delta$  -99.60 (d,  $J = 261.2$  Hz), -103.70 (d,  $J = 276.3$  Hz); HRMS (ESI):  $\text{C}_{21}\text{H}_{28}\text{F}_2\text{N}_4\text{NaO}_4^+$   $[\text{M}+\text{Na}]^+$  Calcd 461.1971, Found 461.1966.

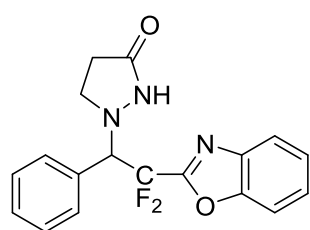

**4k**

difluorinated 3-pyrazolidinone **4k**: pale yellow solid (50 mg, 0.146 mmol, yield 73%); m.p. 172-174 °C; IR (KBr)  $\nu$  605, 845, 957, 1101, 1222, 1351, 1454, 1696, 2918  $\text{cm}^{-1}$ ;  $^1\text{H}$  NMR (400 MHz,  $\text{CDCl}_3$ )  $\delta$  7.80-7.82 (m, 1H), 7.59-7.61 (m, 1H), 7.37-7.50 (m, 7H), 4.80 (dd,  $J = 18.0, 9.6$  Hz, 1H), 3.44-3.52 (m, 1H), 3.31-3.38 (m, 1H), 2.04-2.12 (m, 1H), 1.85-1.93 (m, 1H);  $^{13}\text{C}$  NMR (100 MHz,  $\text{CDCl}_3$ )  $\delta$  175.5, 150.5, 140.0, 130.5, 130.3, 129.8, 129.0, 126.9, 125.4, 121.3, 111.4, 73.6 (dd,  $^2J_{\text{C-F}} = 26.8, 21.5$  Hz), 51.9, 29.7;  $^{19}\text{F}$  NMR (376 MHz,  $\text{CDCl}_3$ )  $\delta$  -98.05 (d,  $J = 277.0$  Hz), -106.98 (d,  $J = 276.9$  Hz); HRMS (ESI):  $\text{C}_{18}\text{H}_{15}\text{F}_2\text{N}_3\text{NaO}_2^+$   $[\text{M}+\text{Na}]^+$  Calcd 366.1025, Found 366.0999.

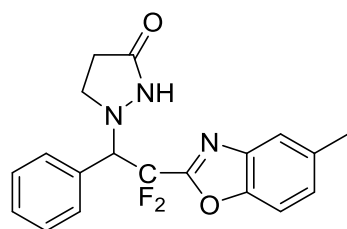

**4l**

difluorinated 3-pyrazolidinone **4l**: pale yellow solid (24 mg, 0.068 mmol, yield 34%); m.p. 155-157 °C; IR (KBr)  $\nu$  653, 804, 931, 1041, 1179, 1295, 1459, 1700, 2920  $\text{cm}^{-1}$ ;  $^1\text{H}$  NMR (400 MHz,  $\text{CDCl}_3$ )  $\delta$  7.54 (*br s*, 1H), 7.51, (s, 1H), 7.37-7.41 (m, 3H), 7.28-7.33 (m, 3H), 7.17-7.19 (m, 1H), 4.59 (dd,  $J = 17.6, 9.9$  Hz, 1H), 3.36-3.43 (m, H), 3.23-3.30 (m, 1H), 2.41 (s, 3H), 2.00-2.08 (m, 1H), 1.80-1.89 (m, 1H);  $^{13}\text{C}$  NMR (100 MHz,  $\text{CDCl}_3$ )  $\delta$  175.3, 157.1 (t,  $^2J_{\text{C-F}} = 32.5$  Hz), 148.8, 140.2, 135.4, 130.4, 129.7, 128.9, 128.0, 121.0, 116.1 (t,  $^1J_{\text{C-F}} =$

250.2 Hz), 110.7, 74.0 (t,  $^2J_{C-F} = 26.4, 21.7$  Hz), 51.9, 29.7, 21.5;  $^{19}\text{F}$  NMR (376 MHz, Chloroform-*d*)  $\delta$  -98.37 (d,  $J = 276.8$  Hz), -106.39 (d,  $J = 277.3$  Hz); HRMS (ESI):  $\text{C}_{19}\text{H}_{17}\text{F}_2\text{N}_3\text{NaO}_2^+$   $[\text{M}+\text{Na}]^+$  Calcd 380.1181, Found 380.1159.

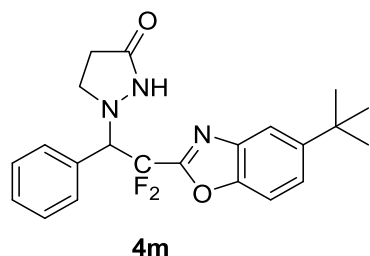

difluorinated 3-pyrazolidinone **4m**: pale yellow oil (22 mg, 0.056 mmol, yield 28%); IR (KBr)  $\nu$  652, 812, 931, 1042, 1178, 1271, 1480, 1695, 2958  $\text{cm}^{-1}$ ;  $^1\text{H}$  NMR (400 MHz,  $\text{CDCl}_3$ )  $\delta$  7.81 (s, 1H), 7.48-7.51 (m, 4H), 7.36-7.41 (m, 3H), 4.67 (dd,  $J = 17.6, 9.9$  Hz, 1H), 3.43-3.51 (m, 1H), 3.30-3.37 (m, 1H), 2.05-2.12 (m, 1H), 1.86-1.94 (m, 1H), 1.38 (s, 9H);  $^{13}\text{C}$  NMR (100 MHz,  $\text{CDCl}_3$ )  $\delta$  175.3, 157.3 (t,  $^2J_{C-F} = 32.8$  Hz), 149.1, 148.6, 140.0, 130.5, 129.7, 129.0, 124.8, 117.6, 116.0 (t,  $^1J_{C-F} = 249.5$  Hz), 110.5, 73.0 (dd,  $^2J_{C-F} = 25.9, 21.4$  Hz), 51.9, 35.0, 31.7, 29.7;  $^{19}\text{F}$  NMR (376 MHz,  $\text{CDCl}_3$ )  $\delta$  -97.35 (d,  $J = 277.3$  Hz), -106.61 (d,  $J = 276.3$  Hz); HRMS (ESI):  $\text{C}_{22}\text{H}_{23}\text{F}_2\text{N}_3\text{NaO}_2^+$   $[\text{M}+\text{Na}]^+$  Calcd 422.1651, Found 422.1661.

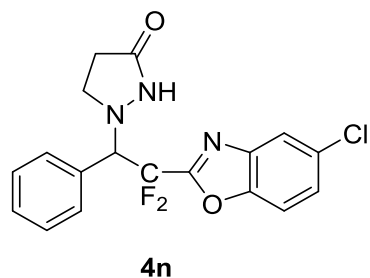

difluorinated 3-pyrazolidinone **4n**: pale yellow solid (28 mg, 0.074 mmol, yield 37%); mp. 170-172  $^\circ\text{C}$ ; IR (KBr)  $\nu$  652, 850, 924, 1044, 1104, 1284, 1452, 1696, 2921  $\text{cm}^{-1}$ ;  $^1\text{H}$  NMR (400 MHz,  $\text{CDCl}_3$ )  $\delta$  7.78 (d,  $J = 1.6$  Hz, 1H), 7.36-7.53 (m, 8H), 4.60 (dd,  $J = 18.0, 9.6$  Hz, 1H), 3.44-3.51 (m, 1H), 3.32-3.38 (m, 1H), 2.05-2.13 (m, 1H), 1.86-1.94 (m, 1H);  $^{13}\text{C}$  NMR (100 MHz,  $\text{CDCl}_3$ )  $\delta$  175.5, 158.6 (t,  $^2J_{C-F} = 33.1$  Hz), 149.1, 141.0, 131.1, 130.4, 130.1, 129.8, 129.0, 127.3, 121.2, 115.9 (t,  $^1J_{C-F} = 261.1$  Hz), 112.1, 73.9 (dd,  $^2J_{C-F} = 26.6, 21.6$  Hz), 53.4, 52.0, 29.7;  $^{19}\text{F}$  NMR (376 MHz,  $\text{CDCl}_3$ )  $\delta$  -98.67 (d,  $J = 277.4$  Hz), -107.05 (d,  $J = 277.5$  Hz); HRMS (ESI):  $\text{C}_{18}\text{H}_{14}\text{ClF}_2\text{N}_3\text{NaO}_2^+$   $[\text{M}+\text{Na}]^+$  Calcd 400.0635, Found 400.0639.

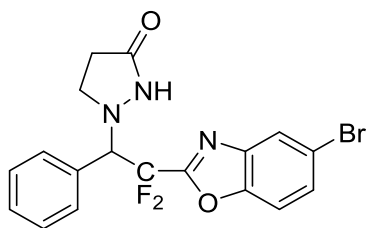

**4o**

difluorinated 3-pyrazolidinone **4o**: pale yellow solid (27 mg, 0.064 mmol, yield 32%); mp. 165-167 °C; IR (KBr)  $\nu$  651, 809, 908, 1034, 1179, 1298, 1447, 1684, 2926  $\text{cm}^{-1}$ ;  $^1\text{H}$  NMR (400 MHz,  $\text{CDCl}_3$ )  $\delta$  7.94 (d,  $J = 1.6$  Hz, 1H), 7.56-7.59 (m, 1H), 7.36-7.49 (m, 7H), 4.66 (dd,  $J = 17.9, 9.8$  Hz, 1H), 3.44-3.51 (m, 1H), 3.31-3.38 (m, 1H), 2.04-2.12 (m, 1H), 1.85-1.94 (m, 1H);  $^{13}\text{C}$  NMR (100 MHz,  $\text{CDCl}_3$ )  $\delta$  175.4, 158.4 (t,  $^2J_{\text{C-F}} = 33.4$  Hz), 149.5, 141.5, 130.4, 130.1, 130.0, 129.8, 129.0, 124.3, 118.3, 115.9 (t,  $^1J_{\text{C-F}} = 250.9$  Hz), 112.6, 73.8 (dd,  $^2J_{\text{C-F}} = 26.4, 21.4$  Hz), 52.0, 29.7;  $^{19}\text{F}$  NMR (376 MHz,  $\text{CDCl}_3$ )  $\delta$  -98.66 (d,  $J = 277.2$  Hz), -107.10 (d,  $J = 277.5$  Hz); HRMS (ESI):  $\text{C}_{18}\text{H}_{14}\text{BrF}_2\text{N}_3\text{NaO}_2^+ [\text{M}+\text{Na}]^+$  Calcd 444.0130, Found 444.0117.

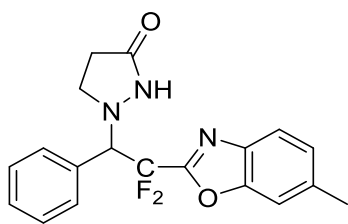

**4p**

difluorinated 3-pyrazolidinone **4p**: pale yellow solid (34 mg, 0.096 mmol, yield 48%); mp. 164-1667 °C; IR (KBr)  $\nu$  654, 748, 806, 930, 1178, 1218, 1457, 1699, 2921  $\text{cm}^{-1}$ ;  $^1\text{H}$  NMR (400 MHz,  $\text{CDCl}_3$ )  $\delta$  7.65 (d,  $J = 8.4$  Hz, 1H), 7.47-7.49 (m, 2H), 7.35-7.40 (m, 4H), 7.22 (d,  $J = 8.4$  Hz, 1H), 4.66 (dd,  $J = 10, 17.6$  Hz, 1H), 3.43-3.50 (m, 1H), 3.31-3.37 (m, 1H), 2.50 (s, 3H), 2.05-2.12 (m, 1H), 1.86-1.94 (m, 1H);  $^{13}\text{C}$  NMR (100 MHz,  $\text{CDCl}_3$ )  $\delta$  175.3, 156.7 (t,  $^2J_{\text{C-F}} = 32.8$  Hz), 150.9, 137.8, 137.5, 130.4, 129.7, 128.9, 126.7, 120.6, 116.1 (t,  $^1J_{\text{C-F}} = 249.9$  Hz), 111.3, 74.0 (dd,  $^2J_{\text{C-F}} = 26.7, 21.6$  Hz), 51.9, 29.7, 21.8;  $^{19}\text{F}$  NMR (376 MHz,  $\text{CDCl}_3$ )  $\delta$  -98.22 (d,  $J = 276.4$  Hz), -106.38 (d,  $J = 276.2$  Hz); HRMS (ESI):  $\text{C}_{19}\text{F}_2\text{N}_3\text{NaO}_2^+ [\text{M}+\text{Na}]^+$  Calcd 380.1181, Found 380.1166.

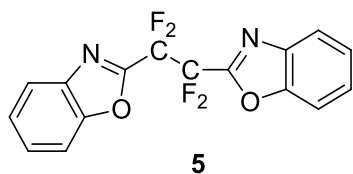

**5**

Dimer **5**: pale yellow solid (12 mg, 0.036 mmol, yield 36%), mp: 132-134 °C; IR (KBr)  $\nu$  427, 584, 671, 751, 865, 967, 1106, 1242, 1352, 1569, 1615, 1727,  $\text{cm}^{-1}$ ;  $^1\text{H}$  NMR (400 MHz,  $\text{CDCl}_3$ )  $\delta$  7.86

(d,  $J = 7.8$  Hz, 2H), 7.66 (d,  $J = 8.2$  Hz, 2H), 7.52 (t,  $J = 7.7$  Hz, 2H), 7.46 (t,  $J = 7.7$  Hz, 2H);  $^{13}\text{C}$   
NMR (100 MHz,  $\text{CDCl}_3$ )  $\delta$  150.9, 139.9, 127.6, 125.7, 121.8, 111.60;  $^{19}\text{F}$  NMR (376 MHz,  $\text{CDCl}_3$ )  
 $\delta$  -112.95; HRMS (ESI):  $\text{C}_{16}\text{H}_8\text{F}_4\text{N}_2\text{NaO}_2^+ [\text{M}+\text{Na}]^+$  Calcd 359.0414, Found 359.0427.

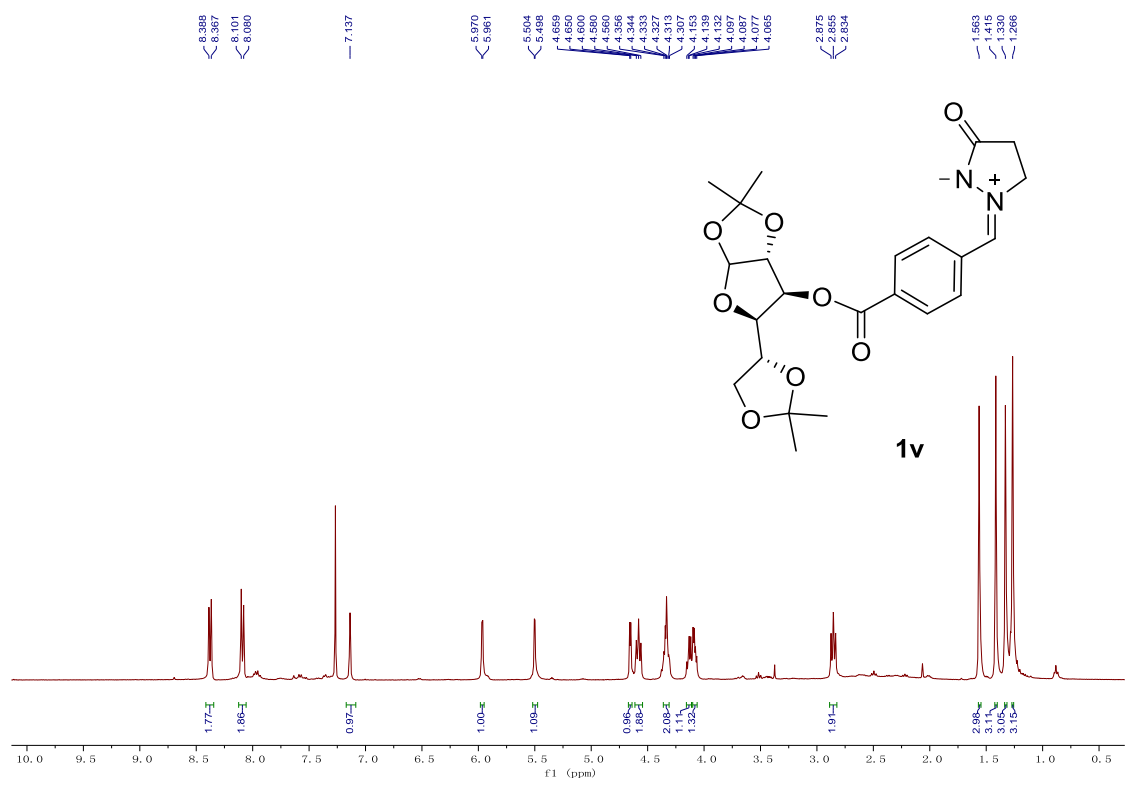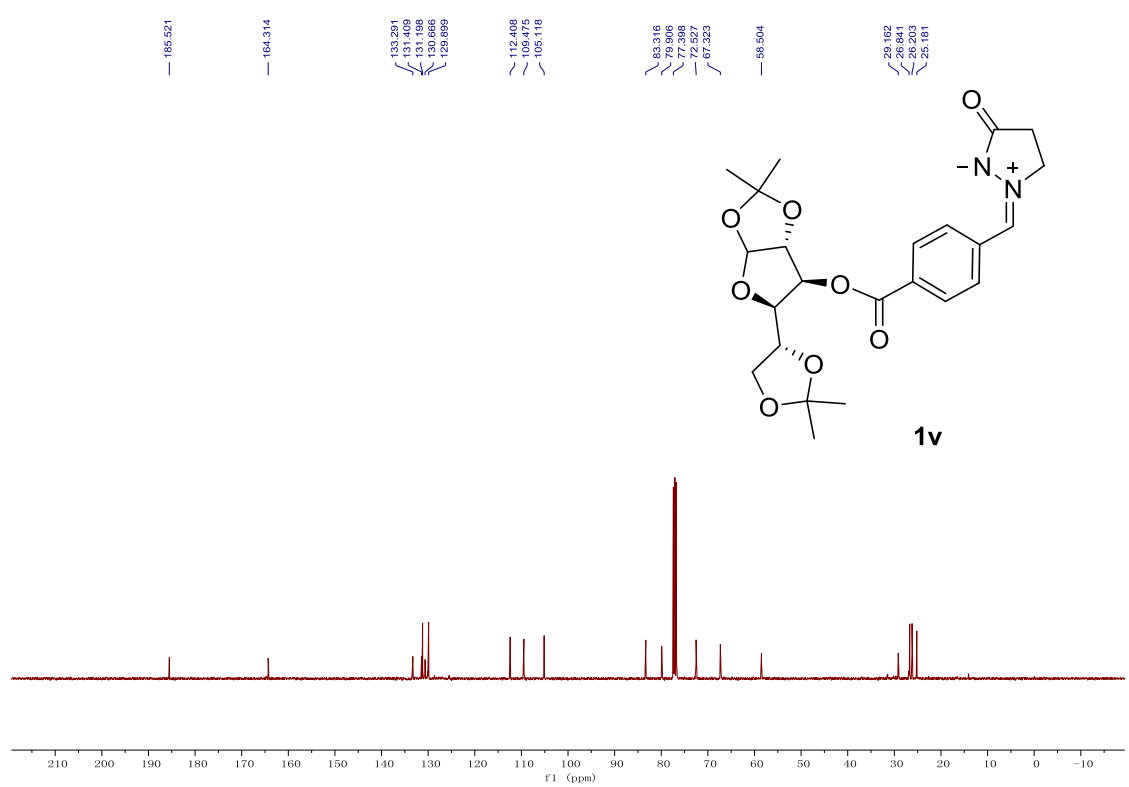

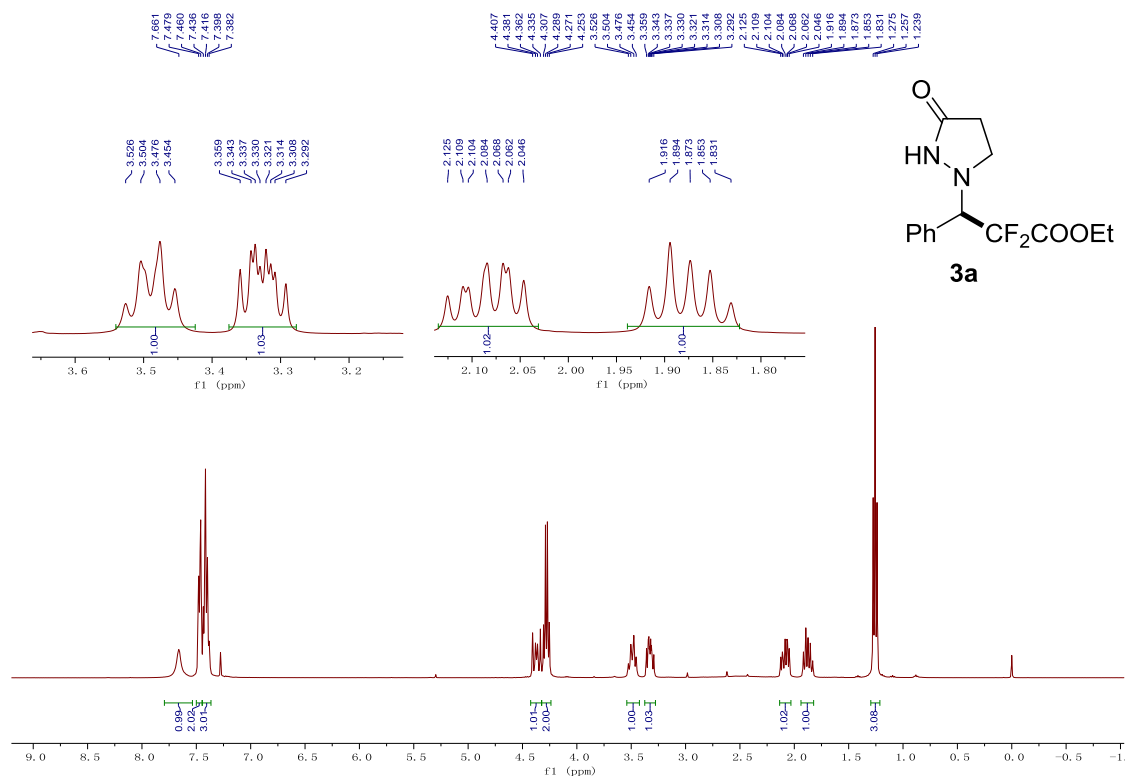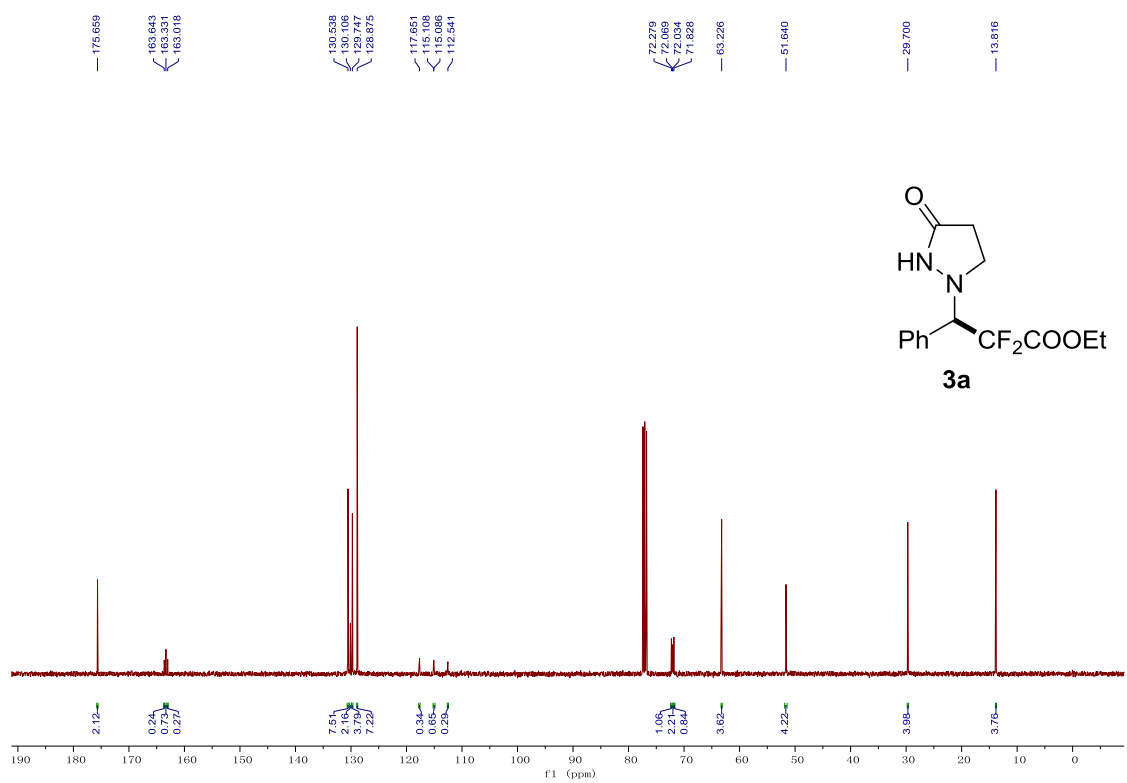



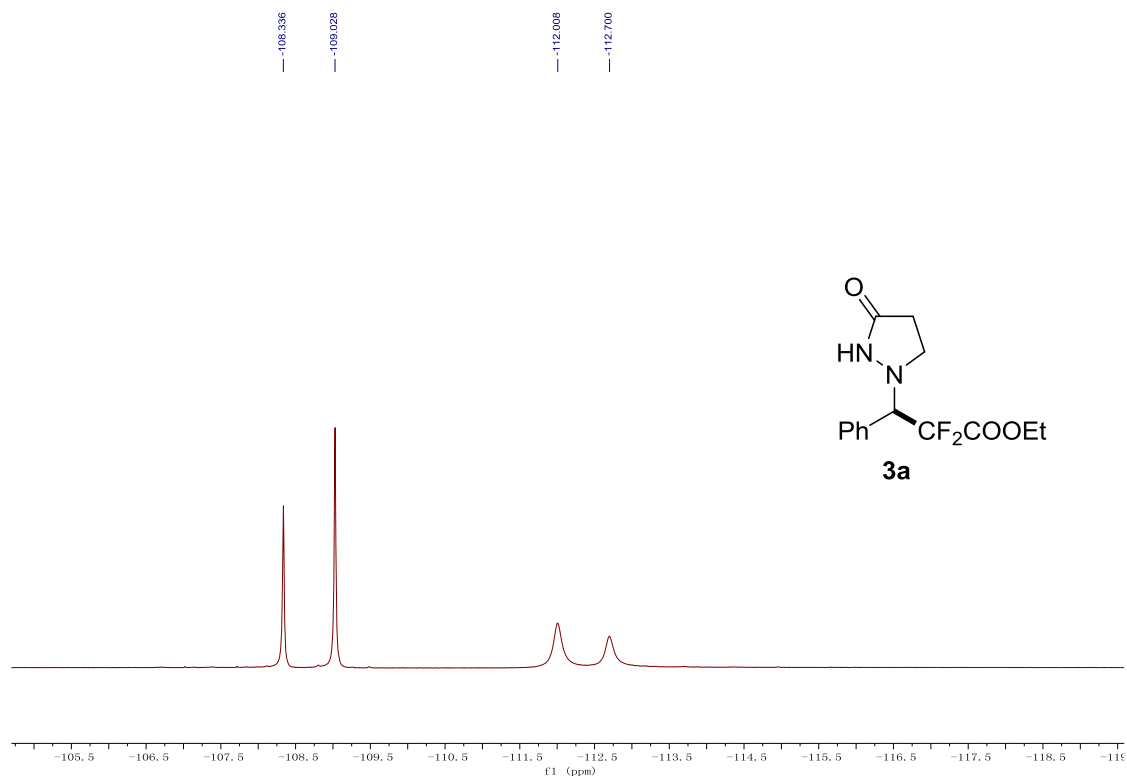

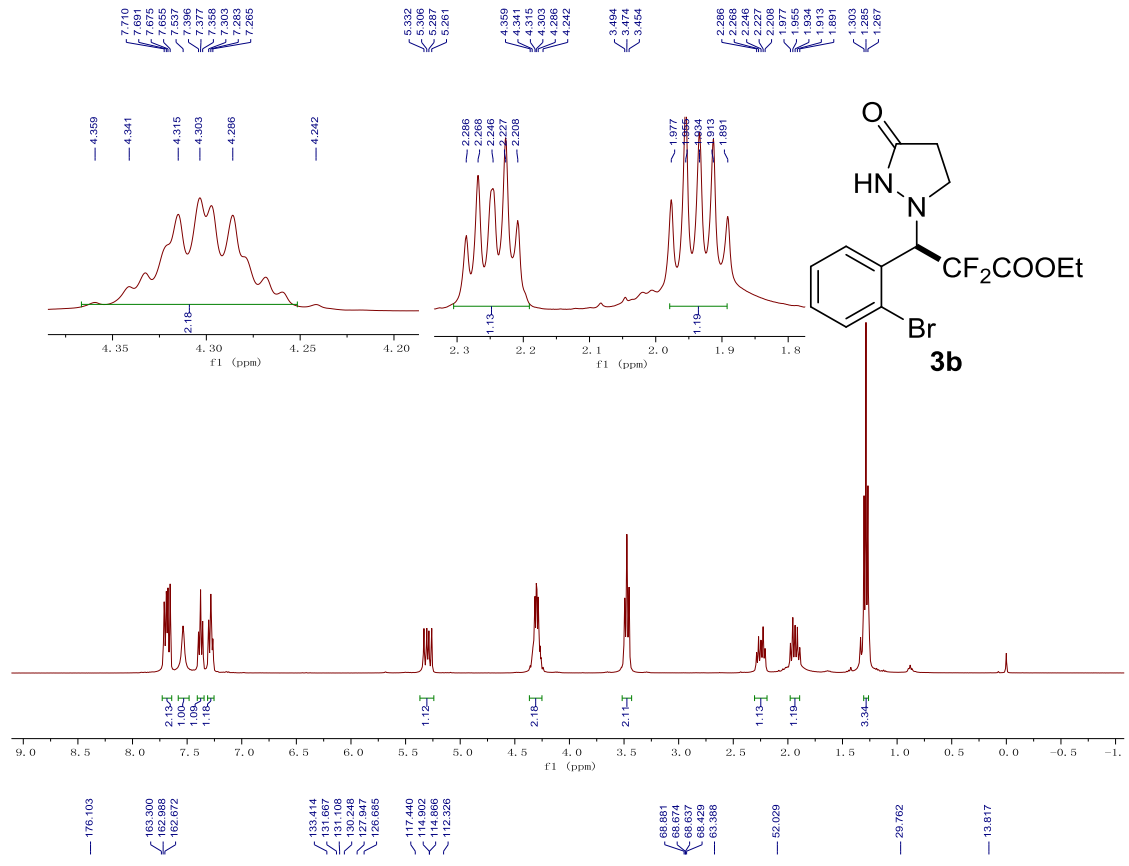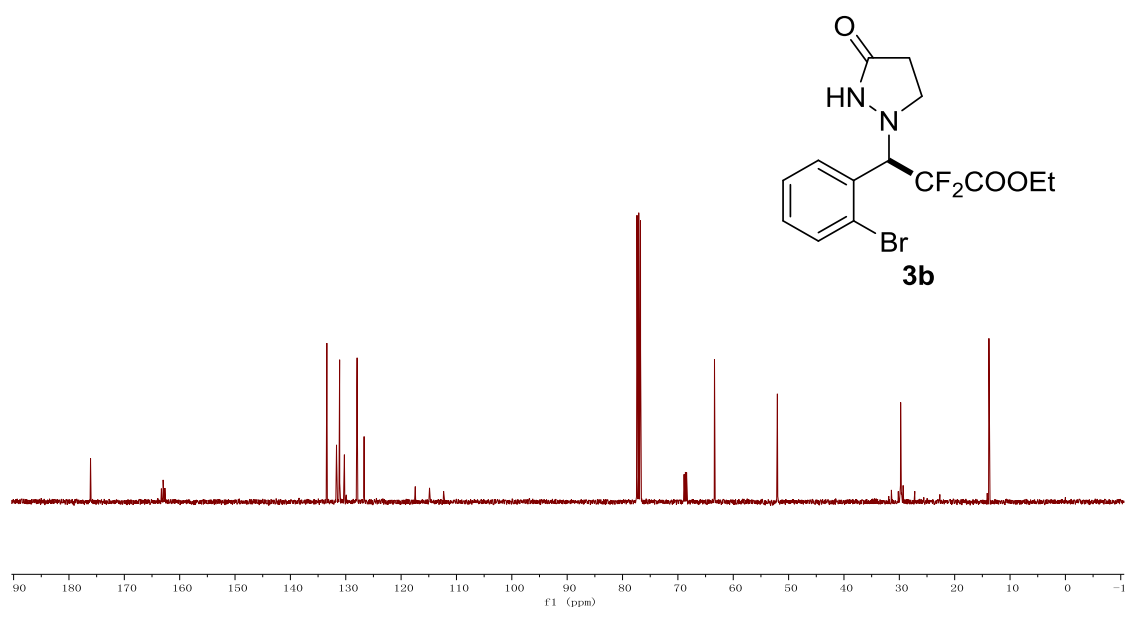

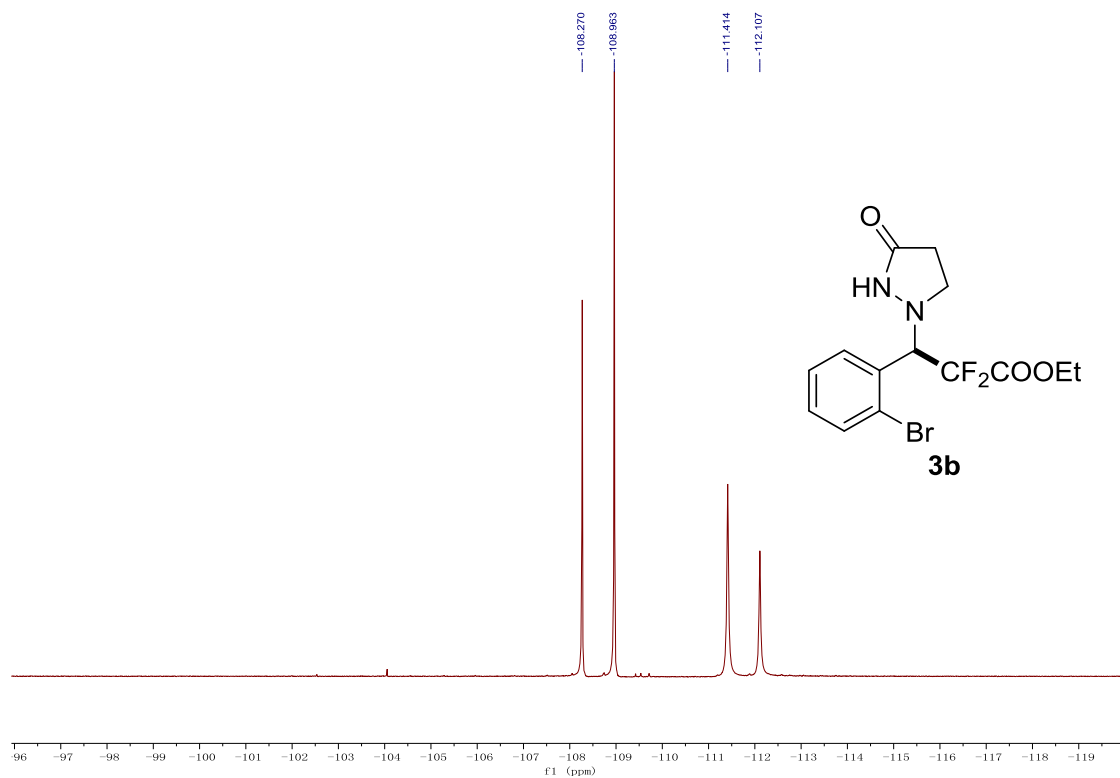

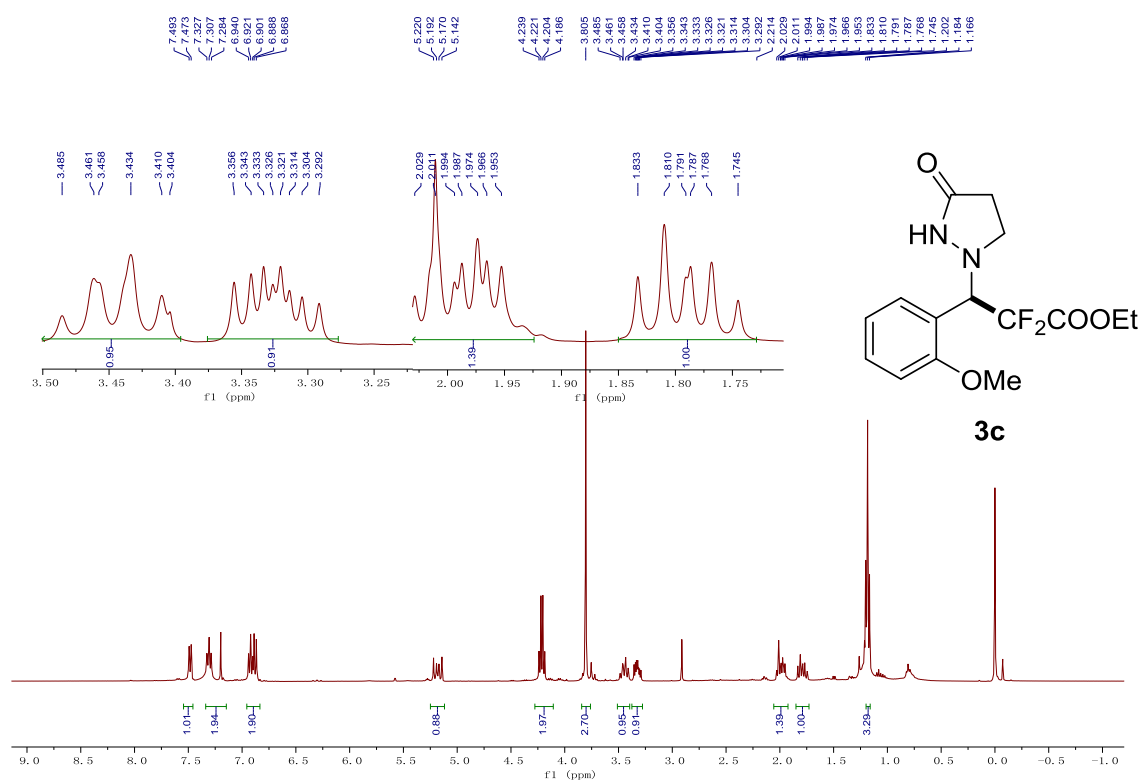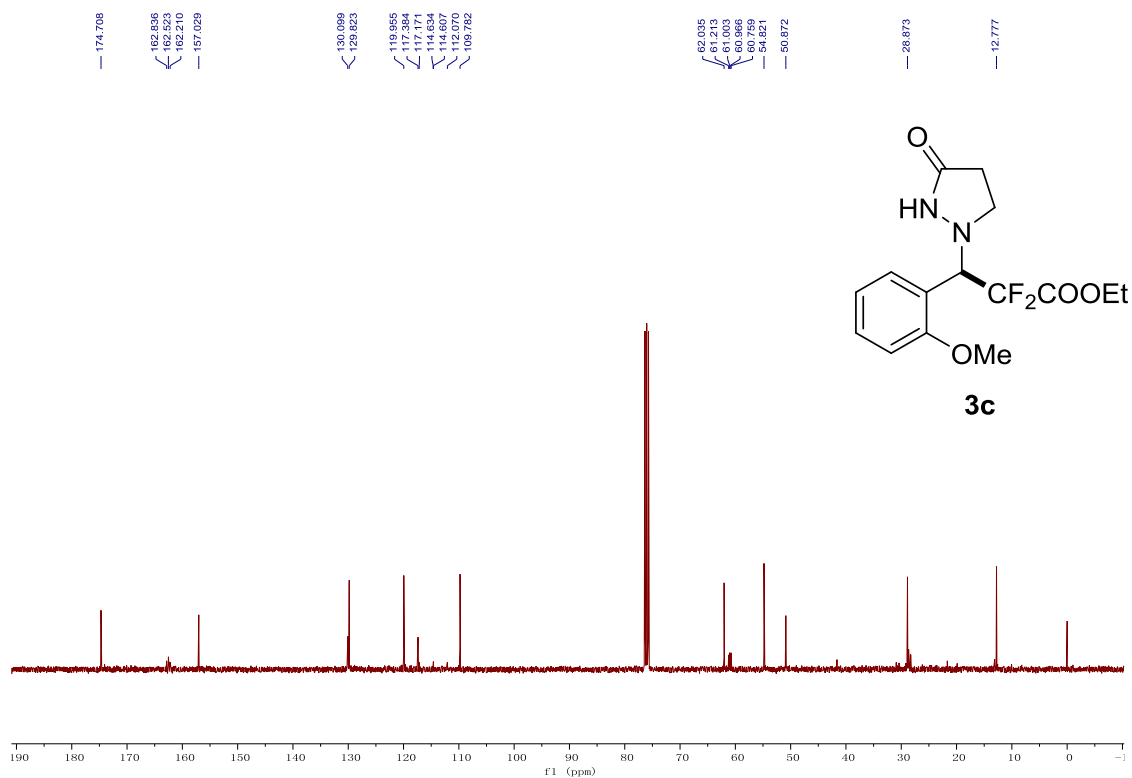

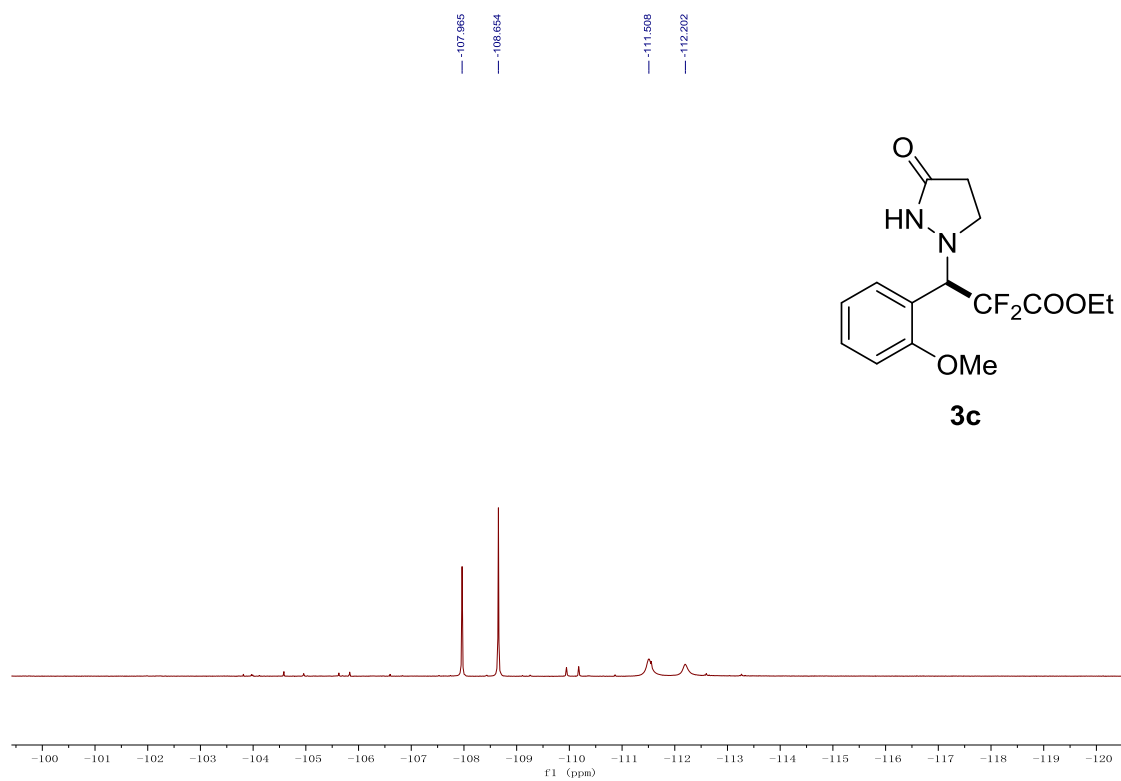

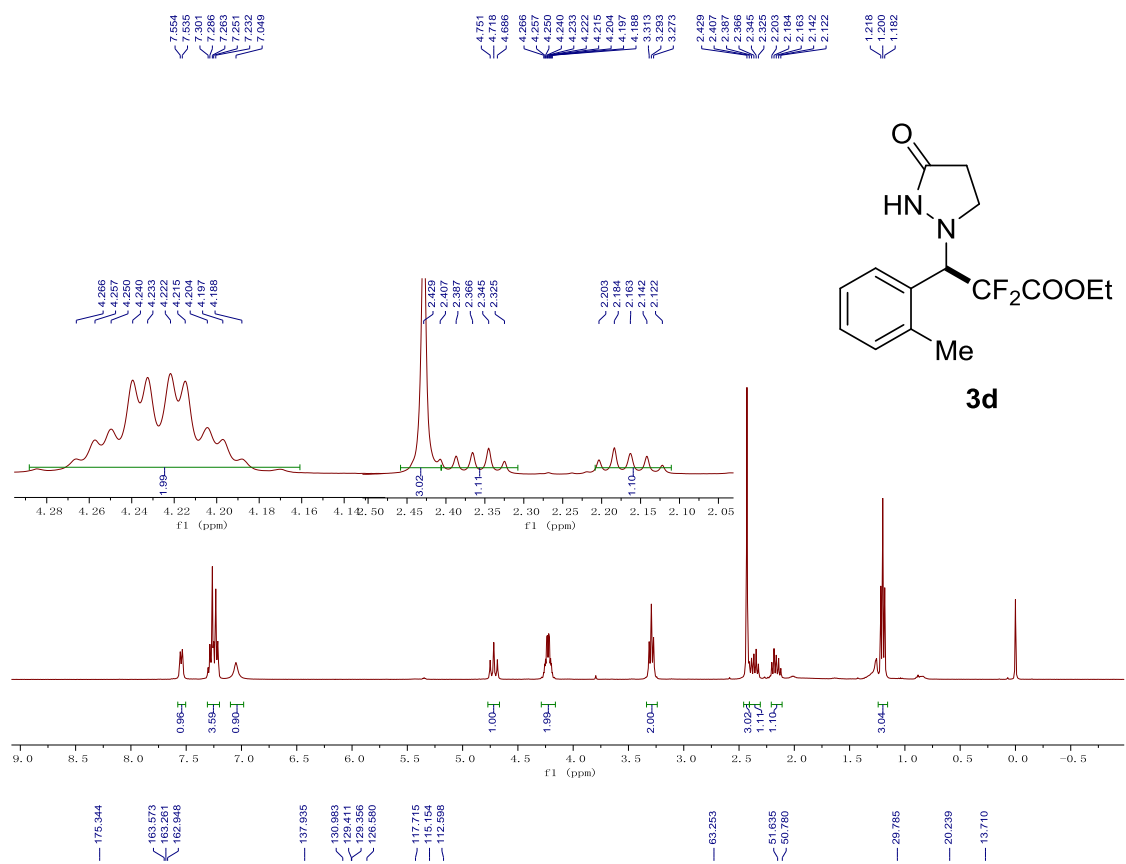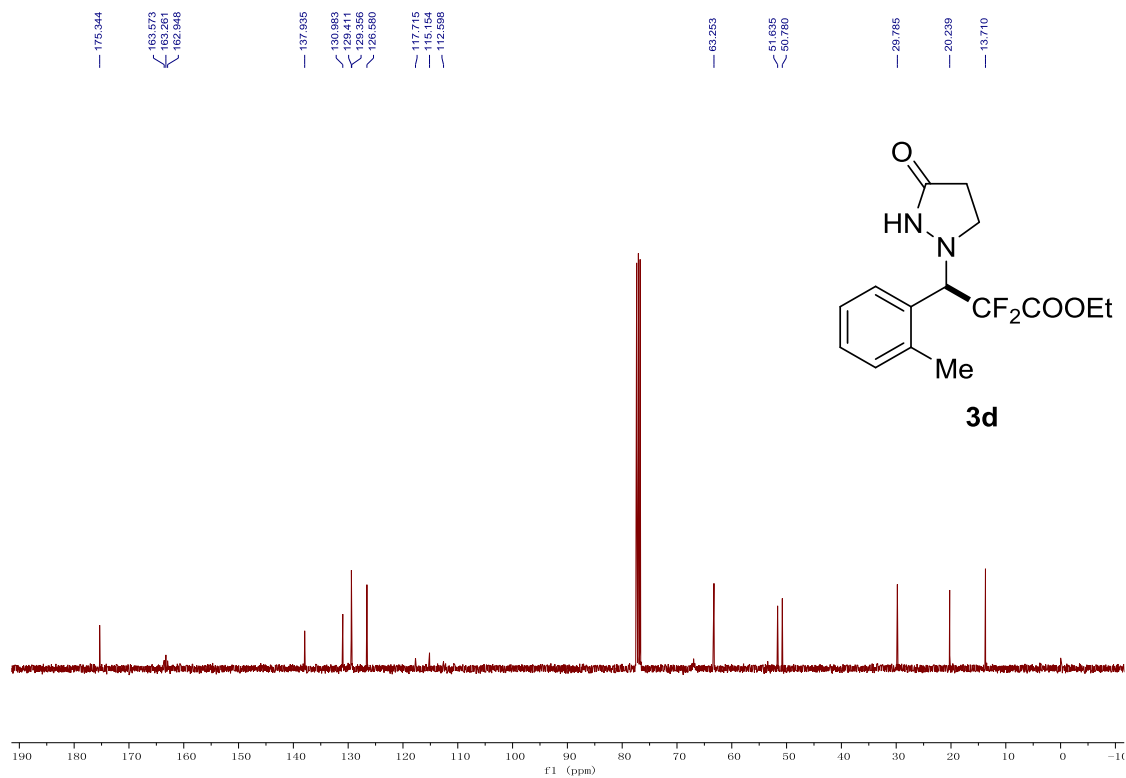

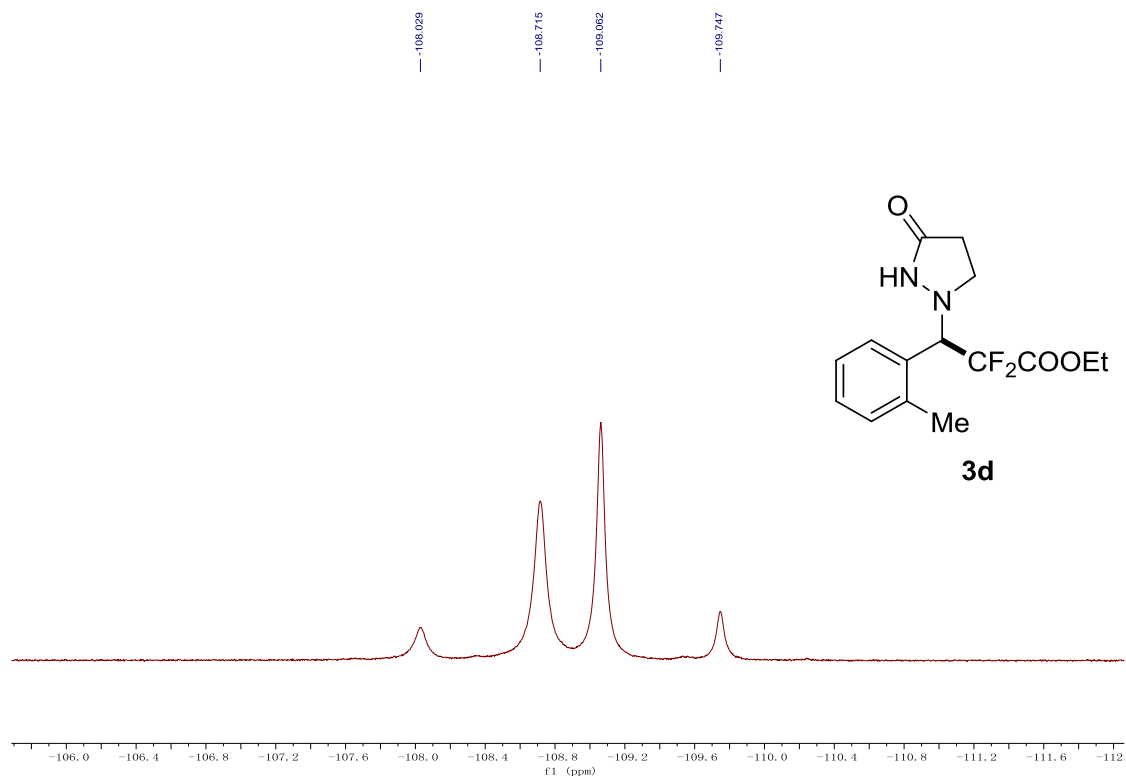

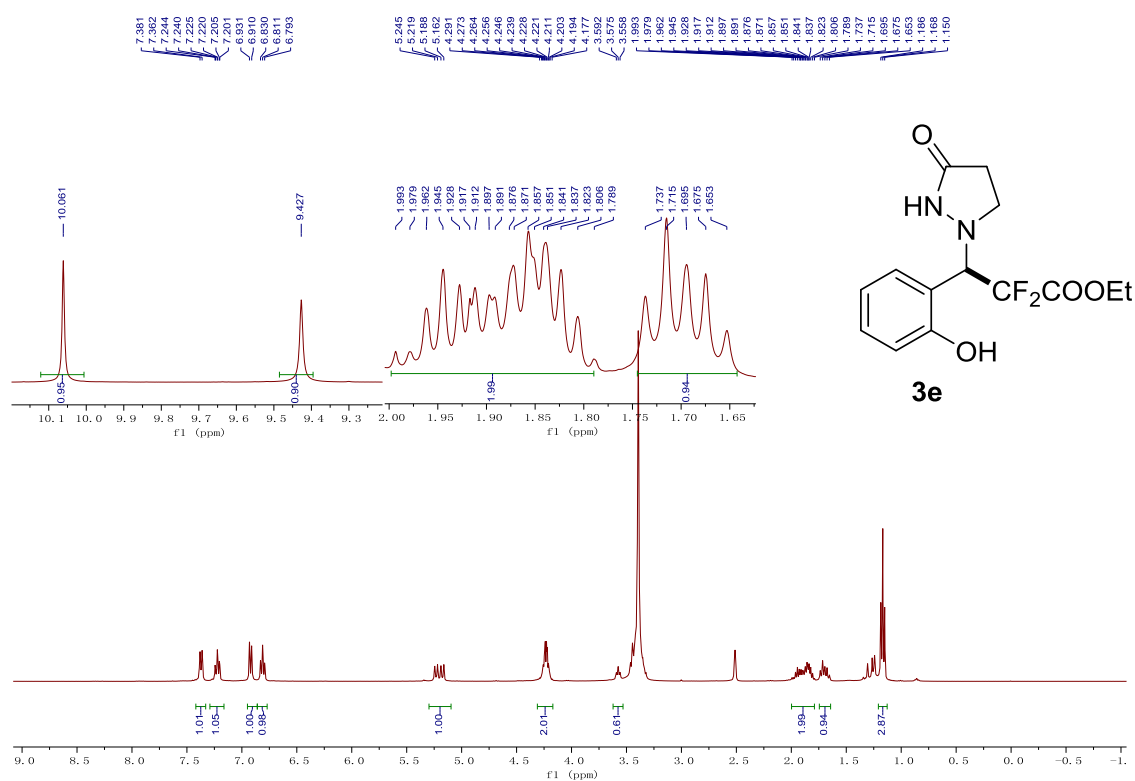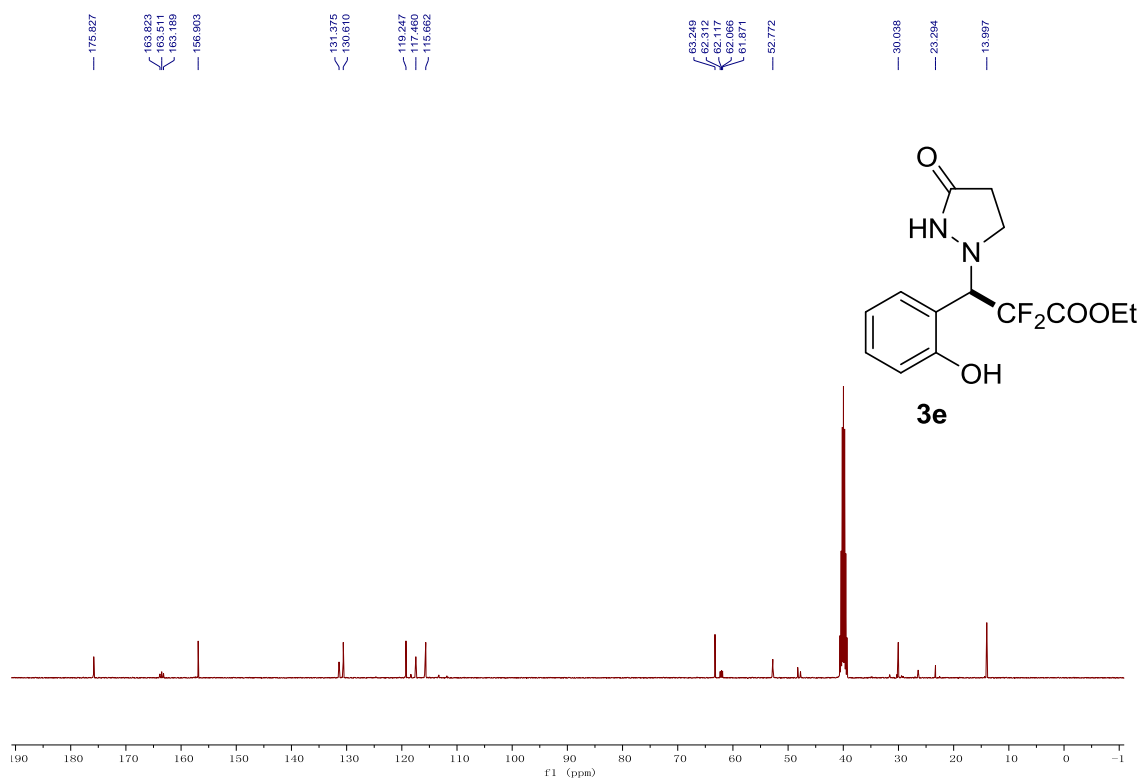



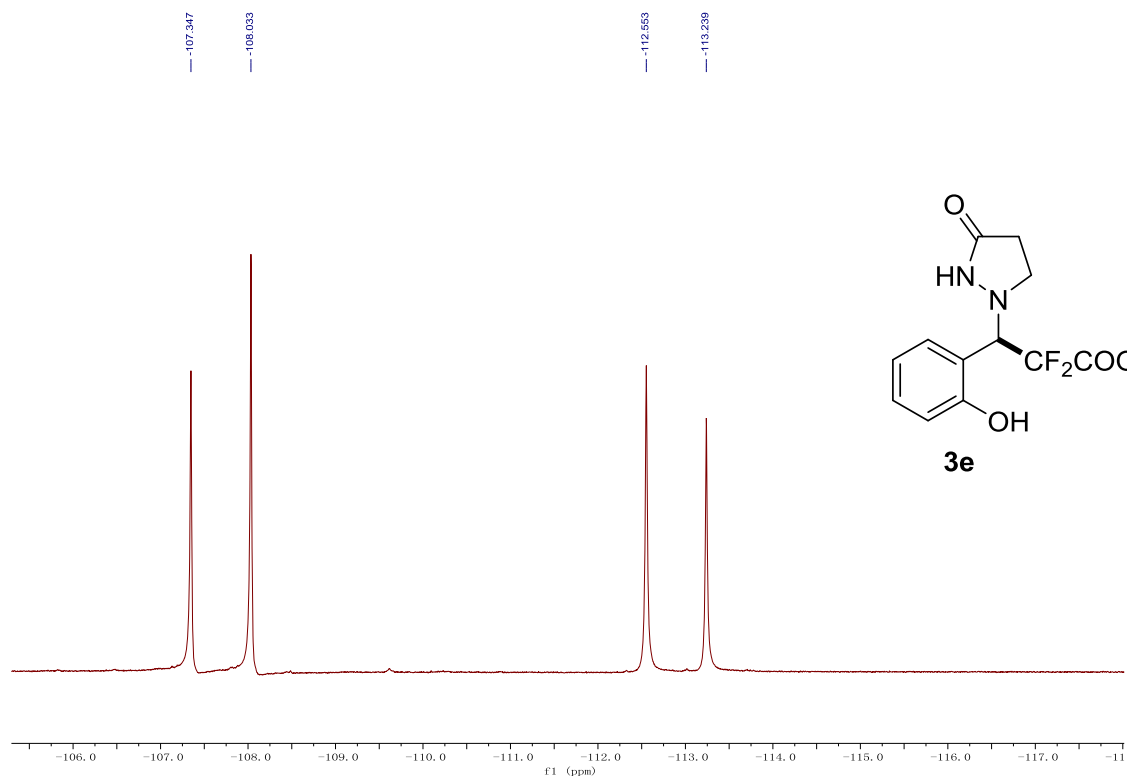

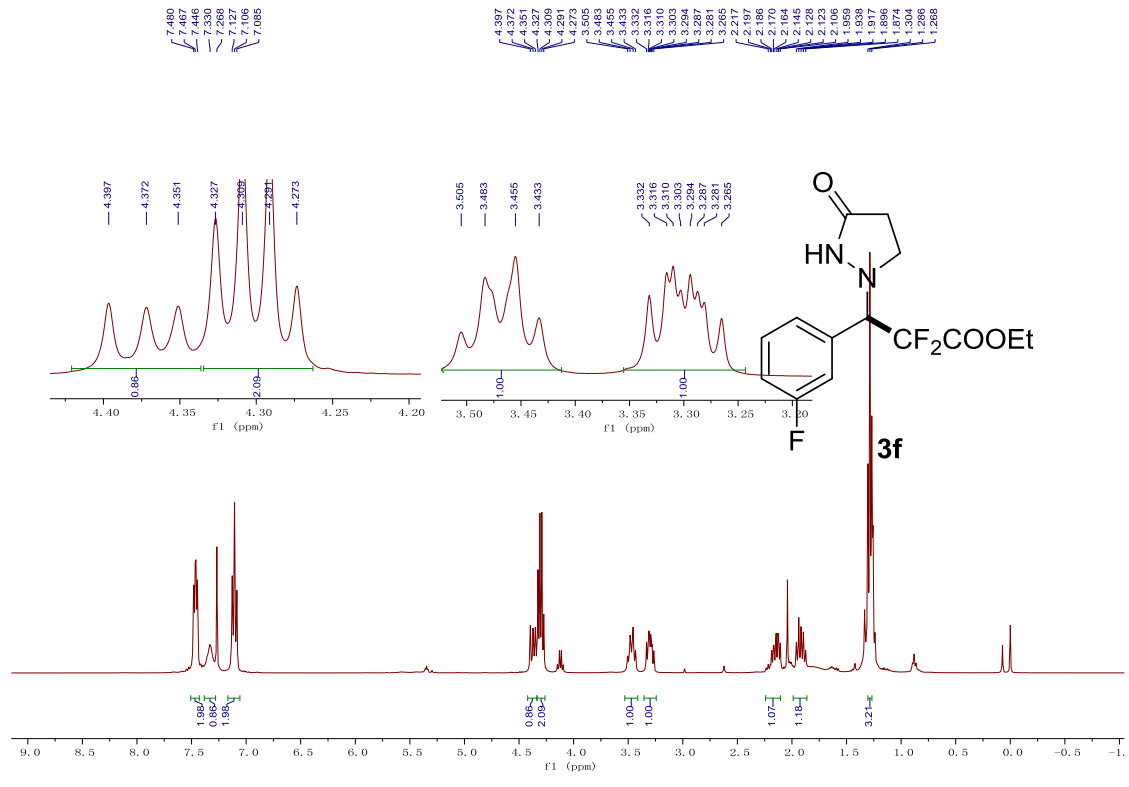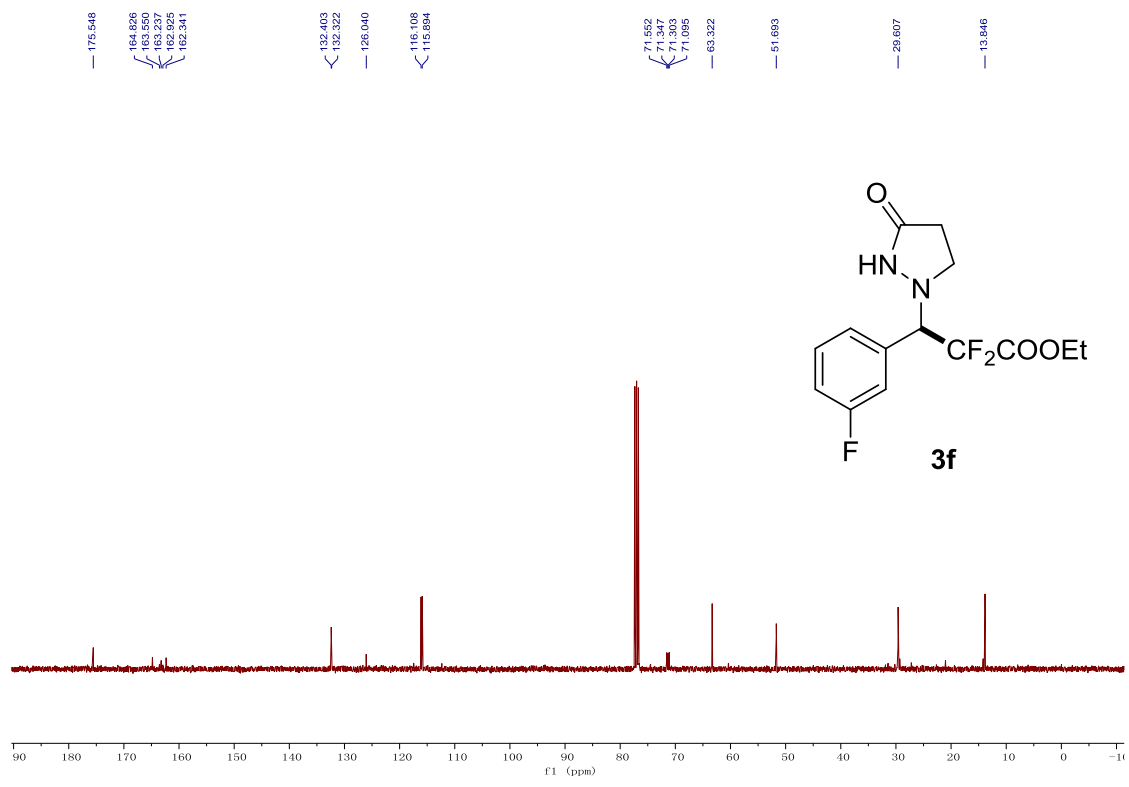

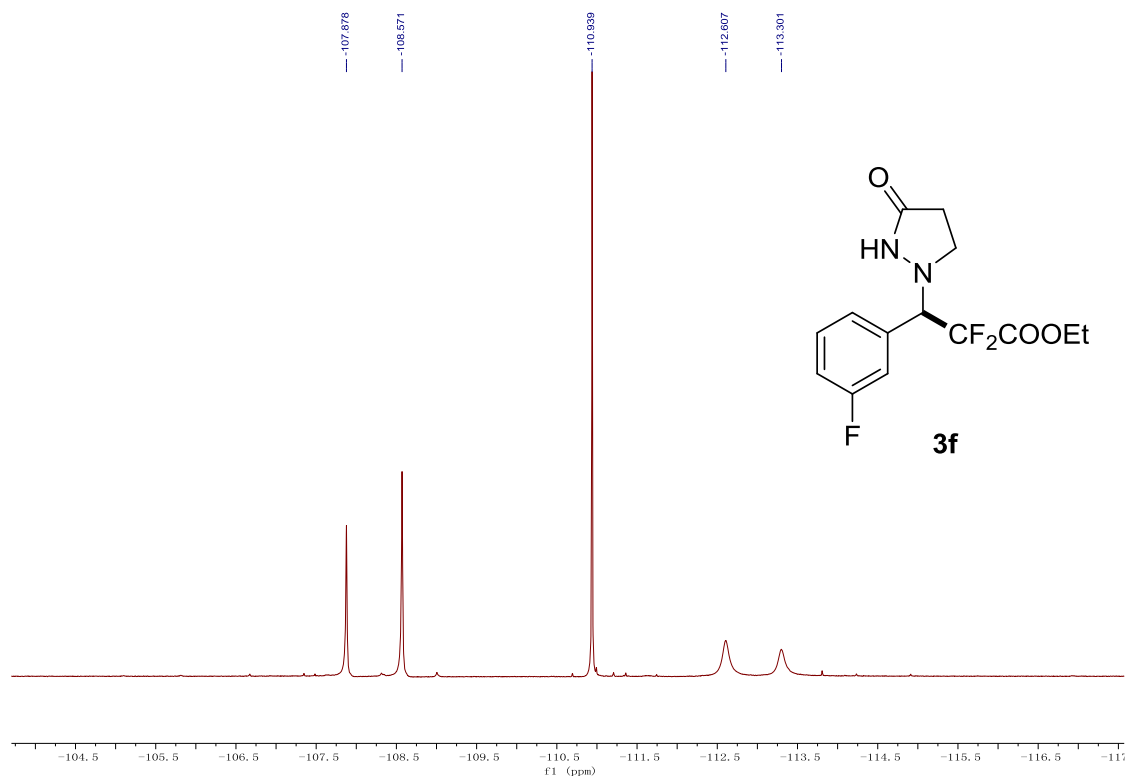

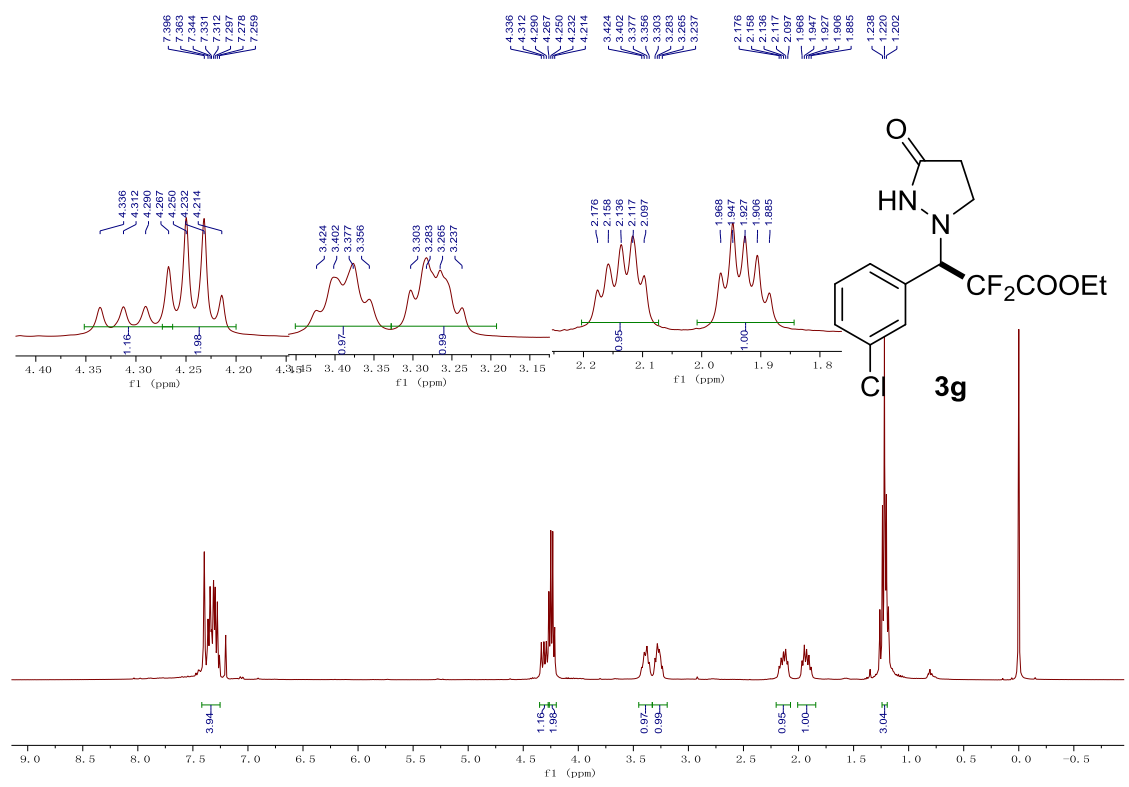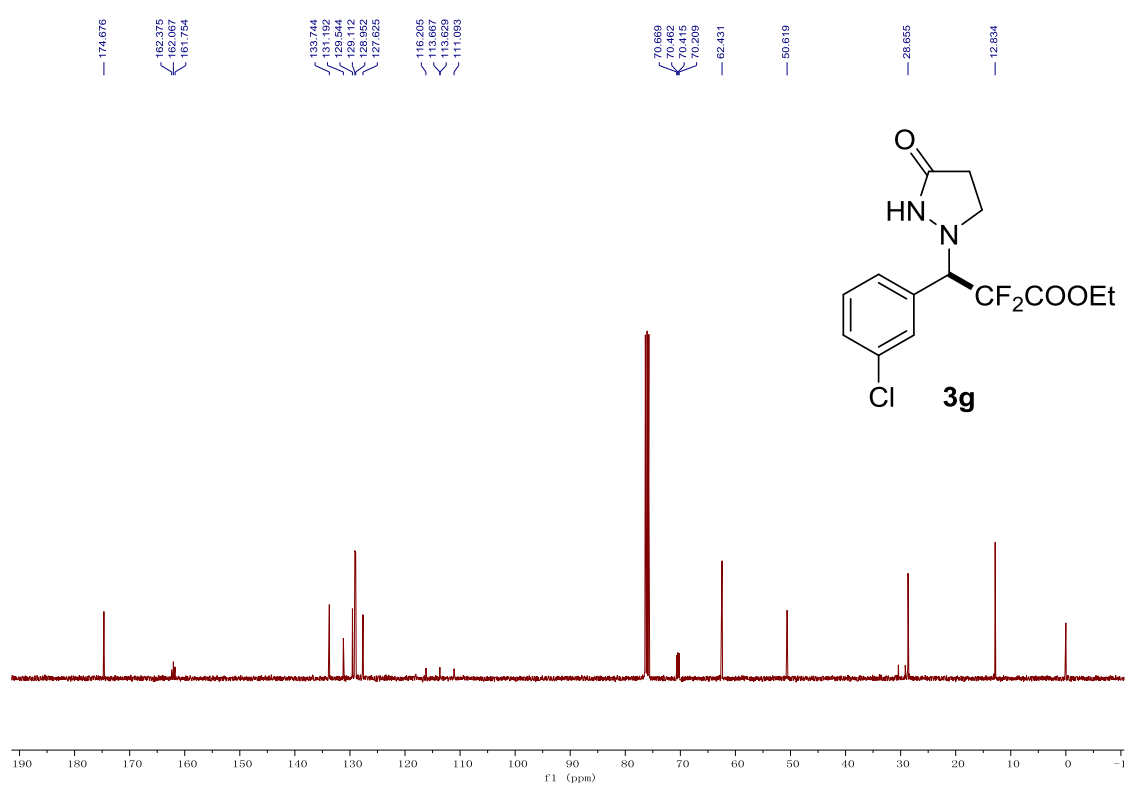

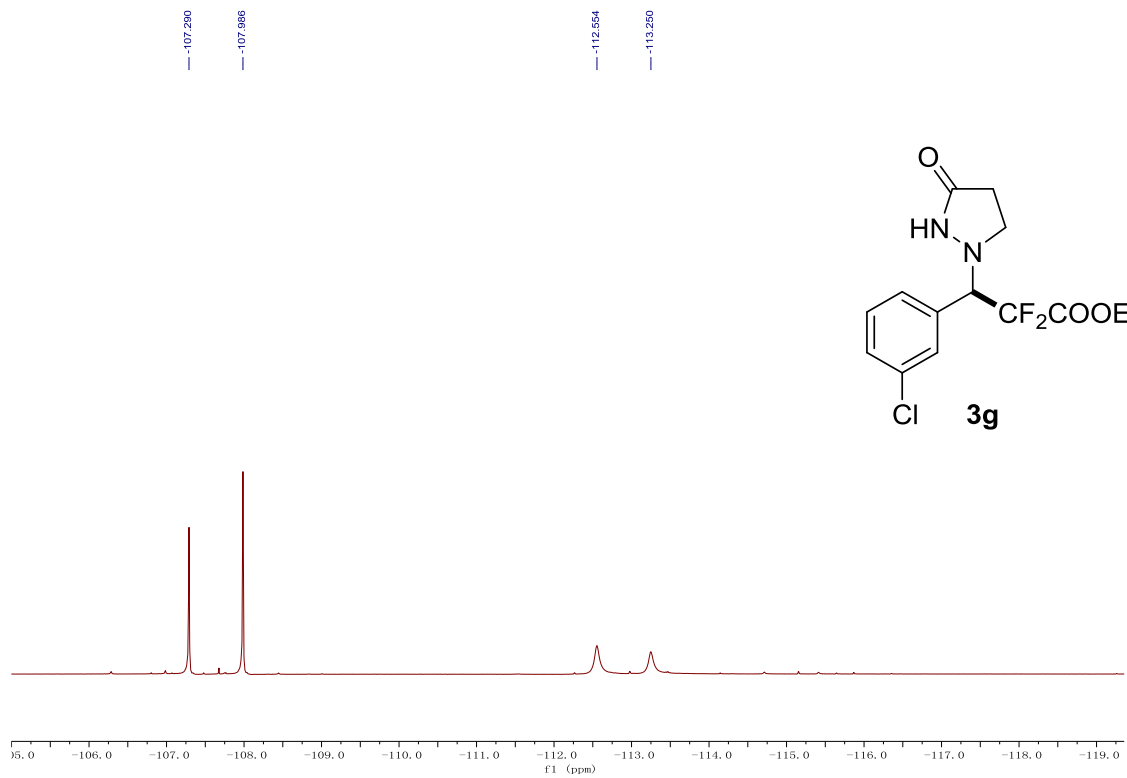

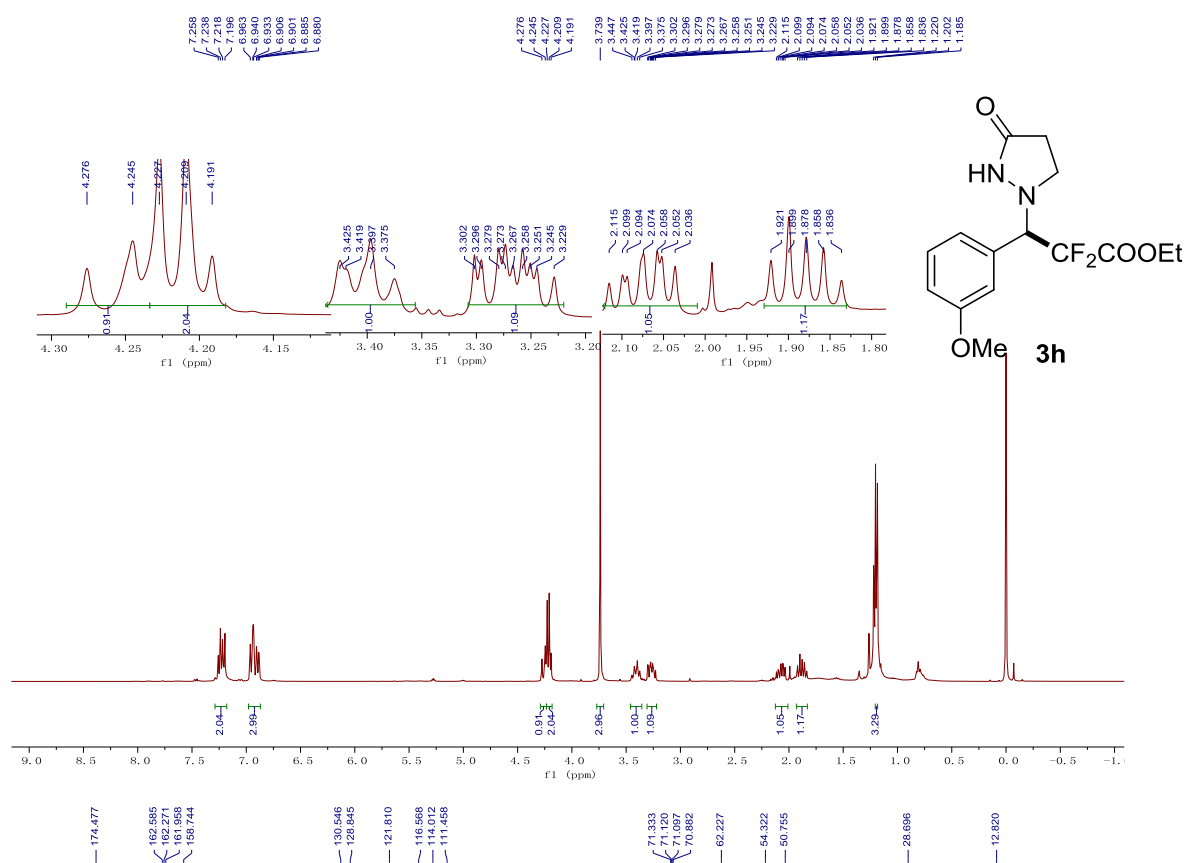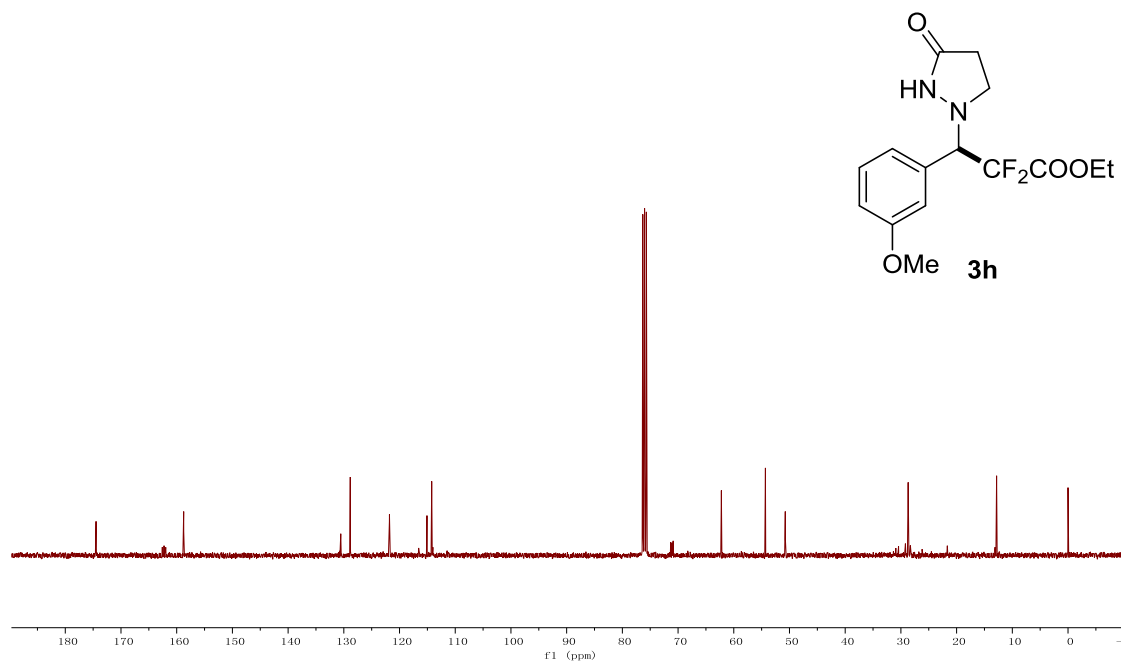

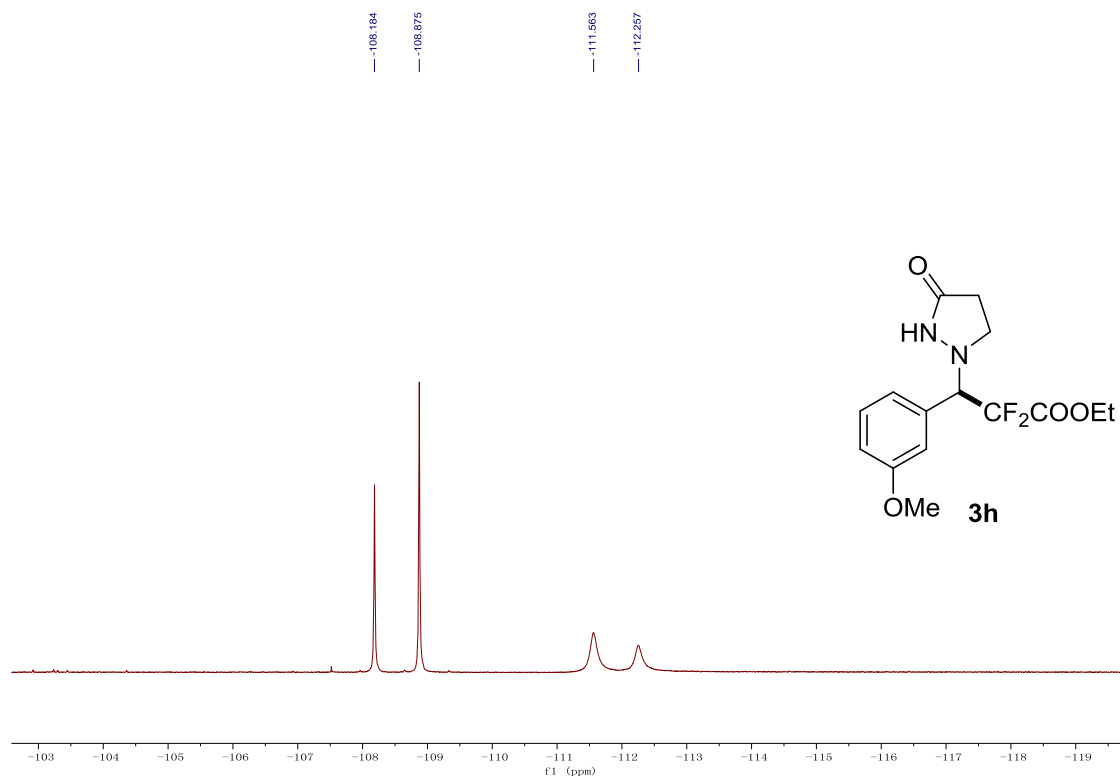

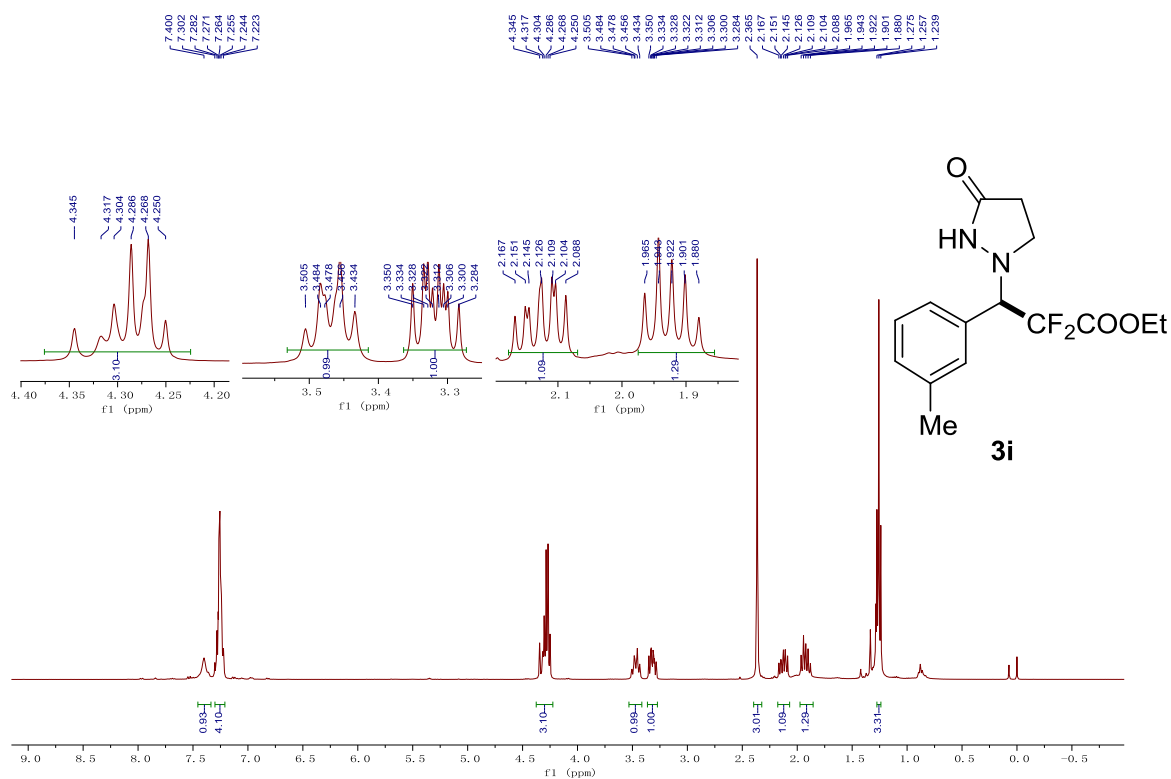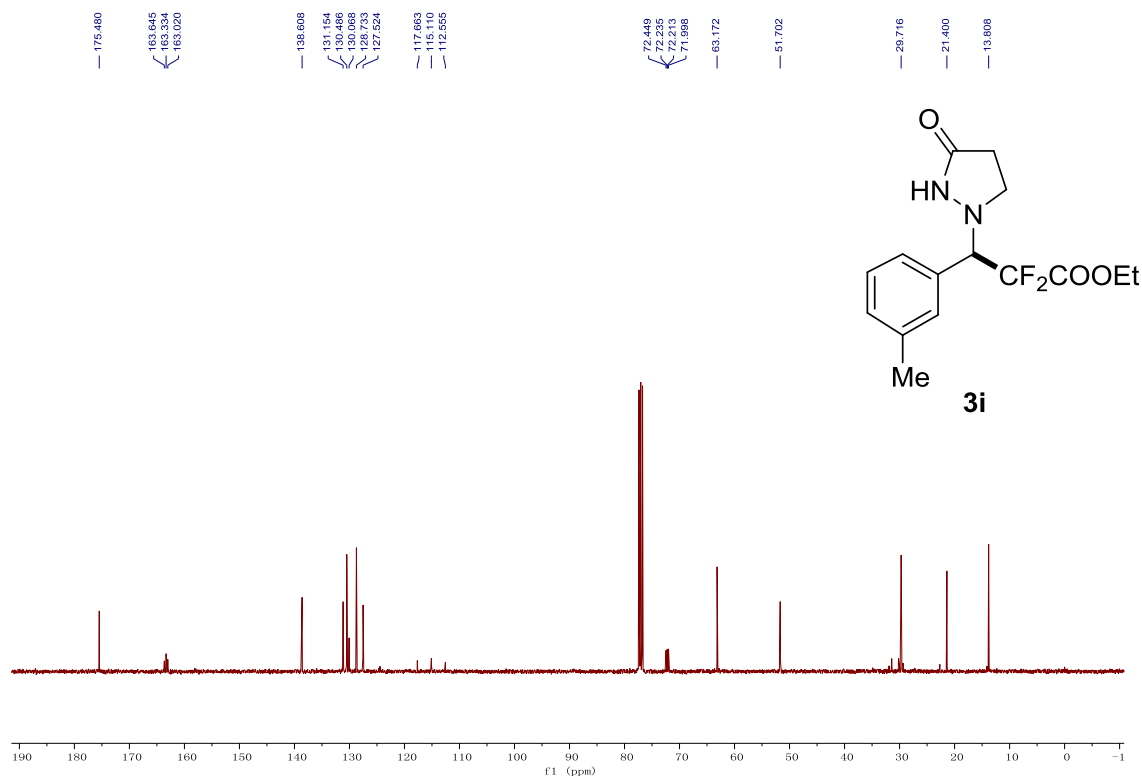



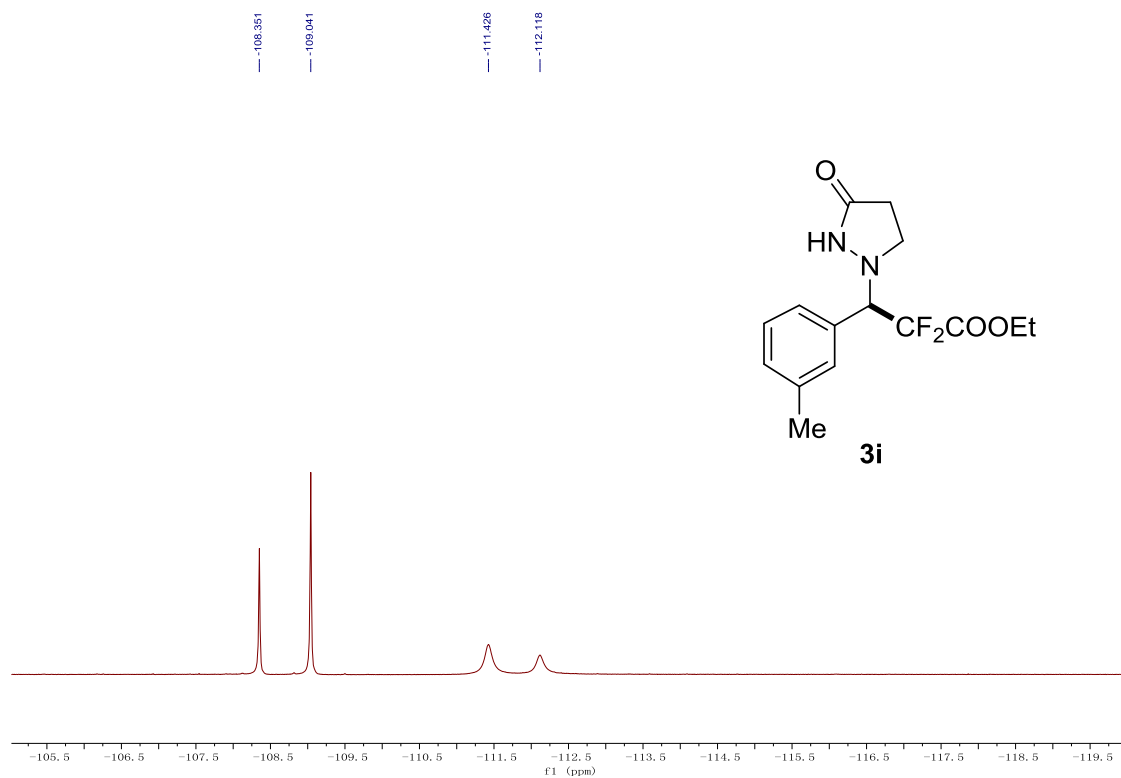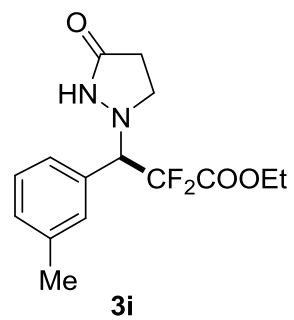

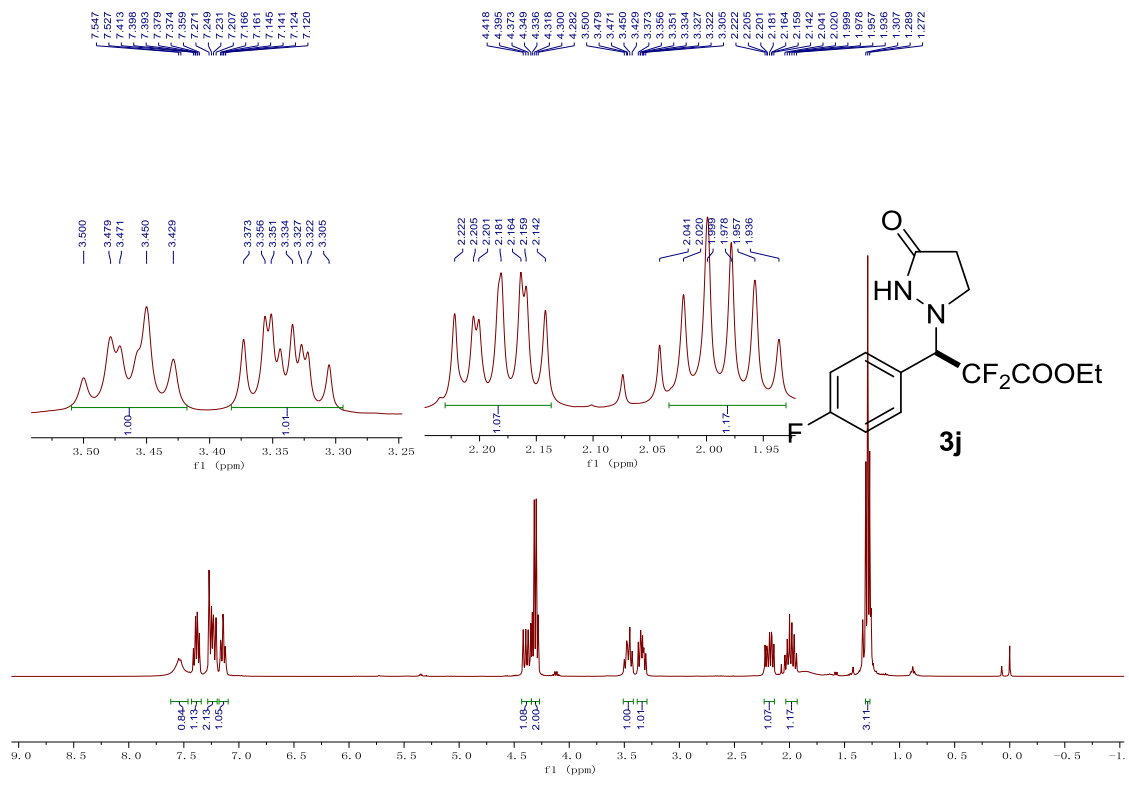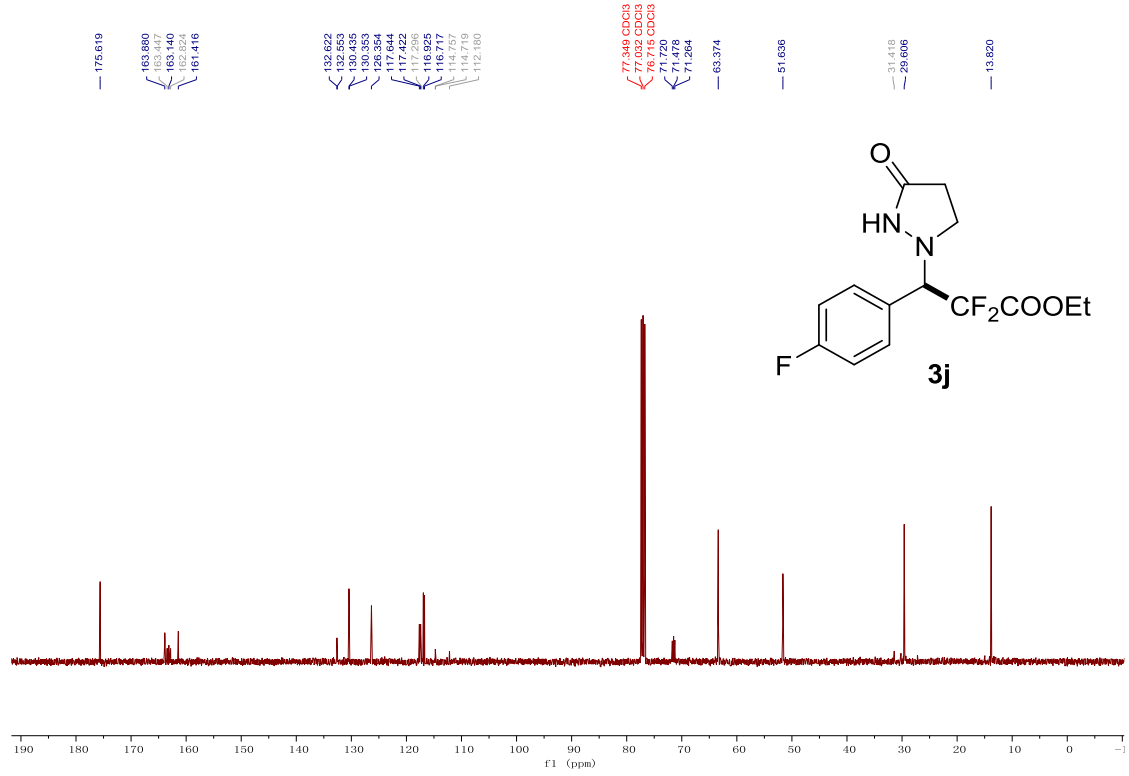

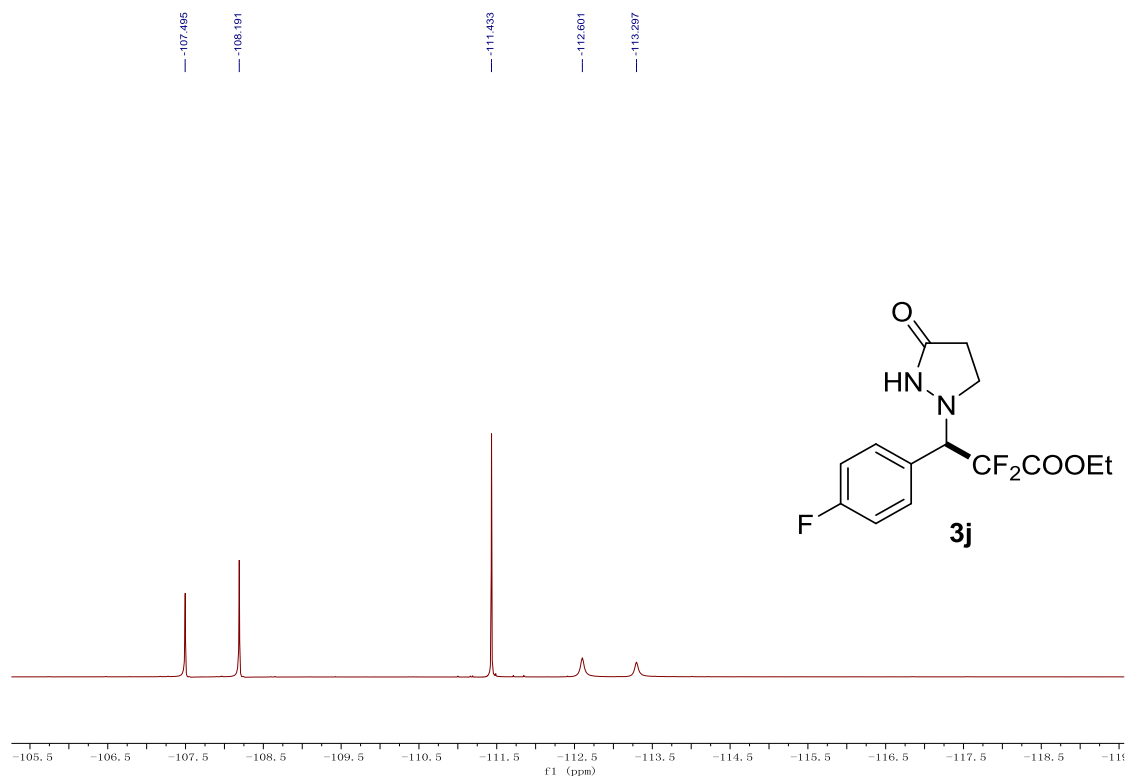

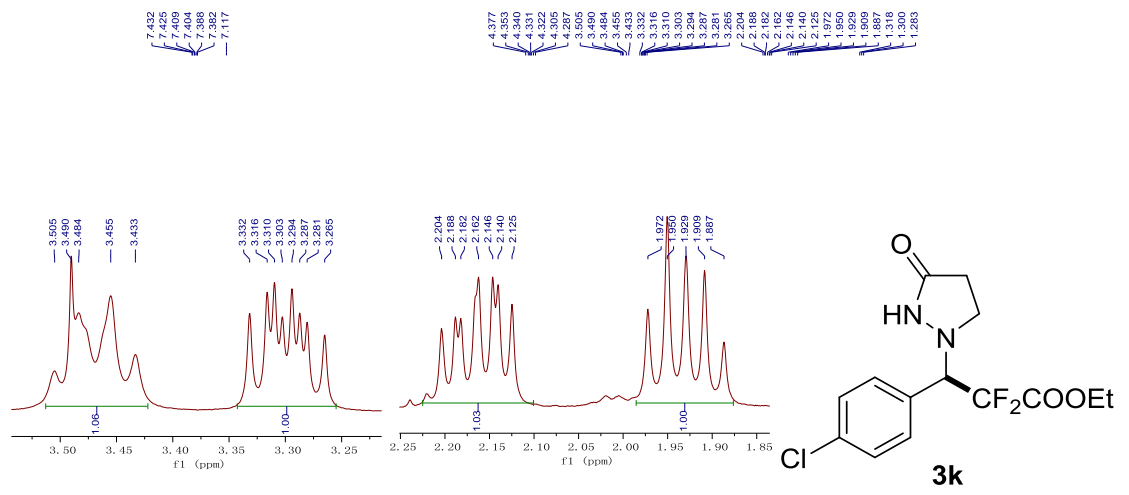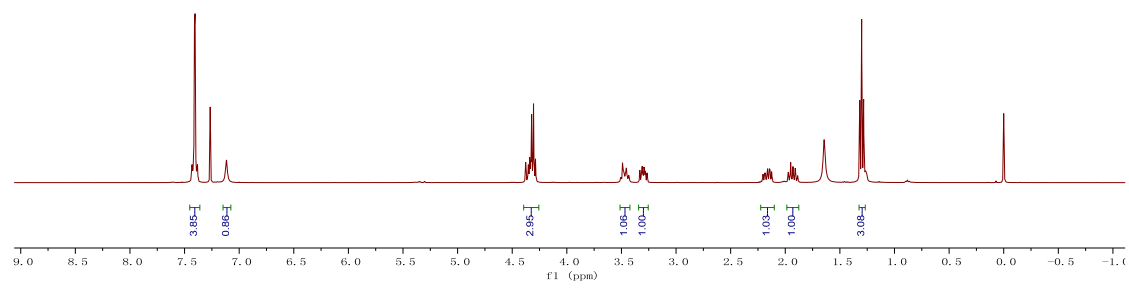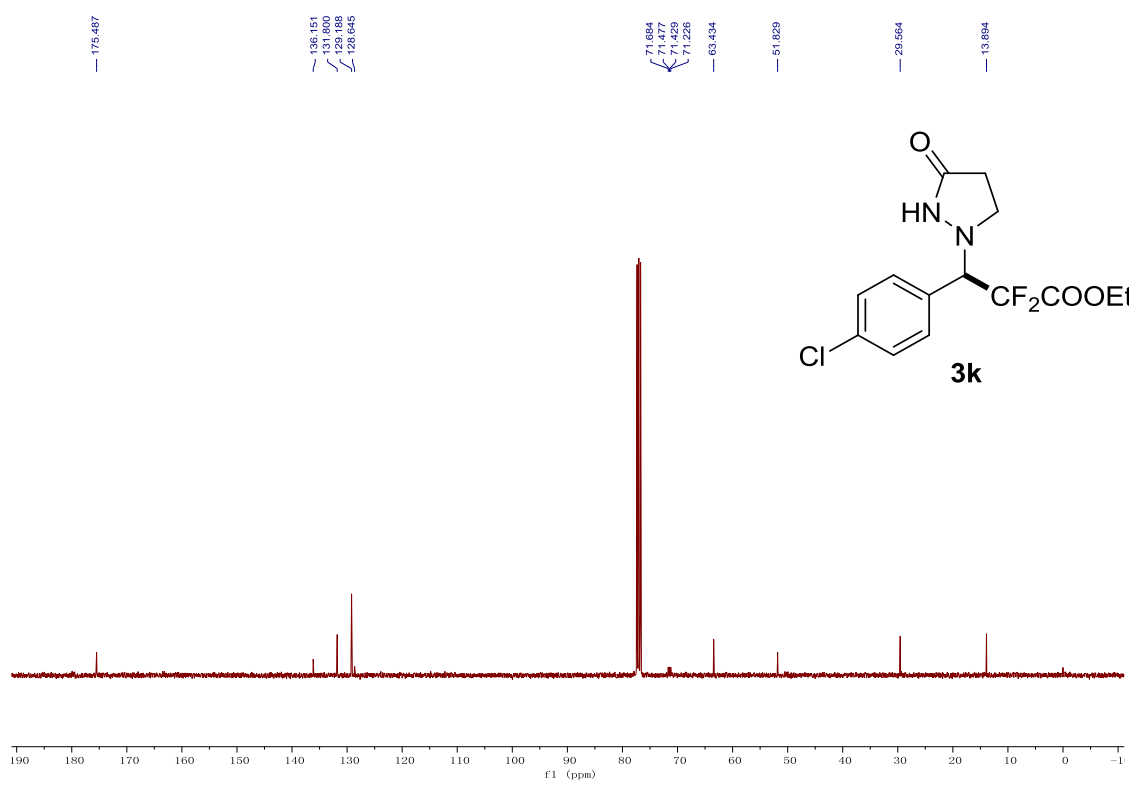

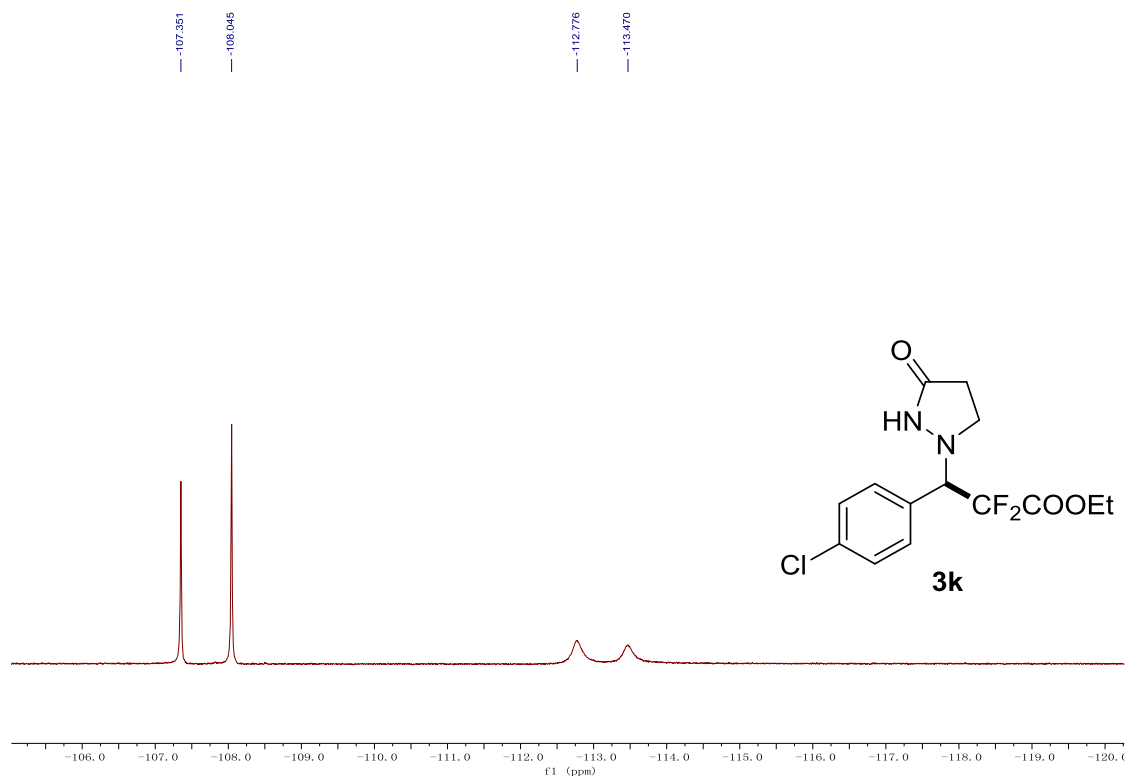

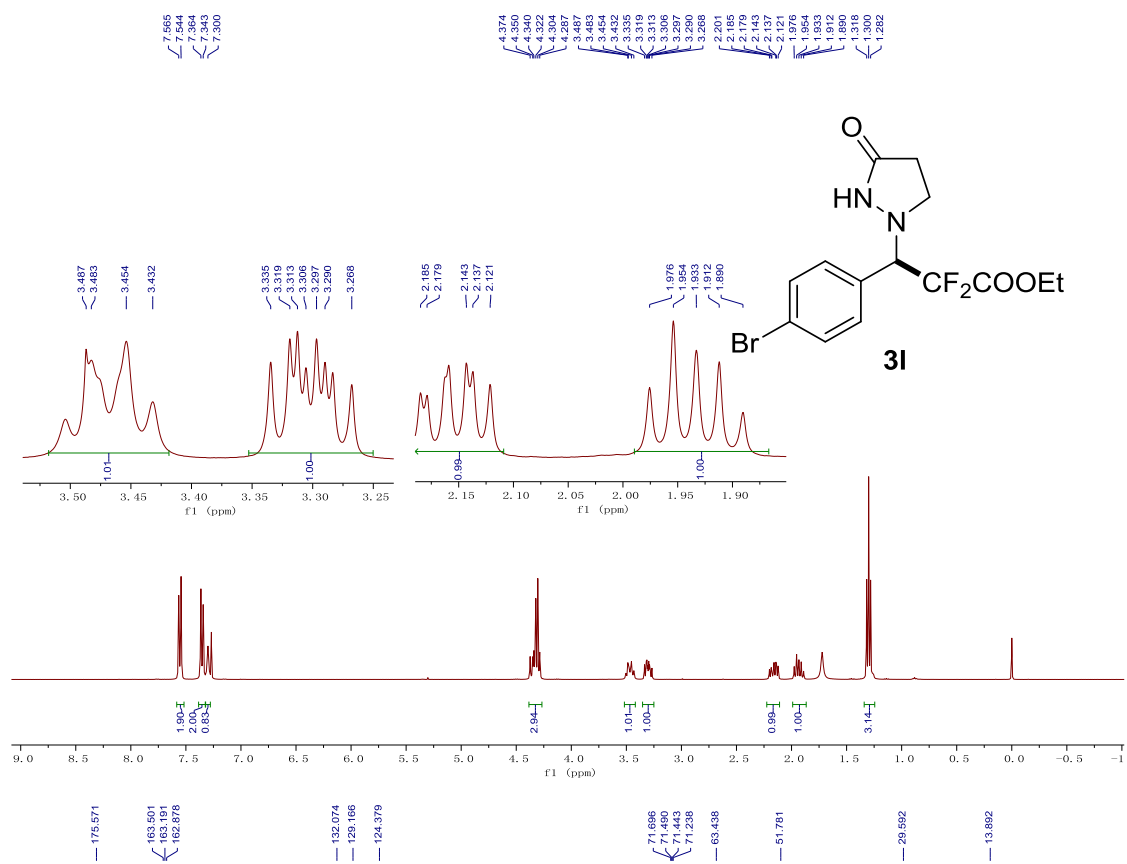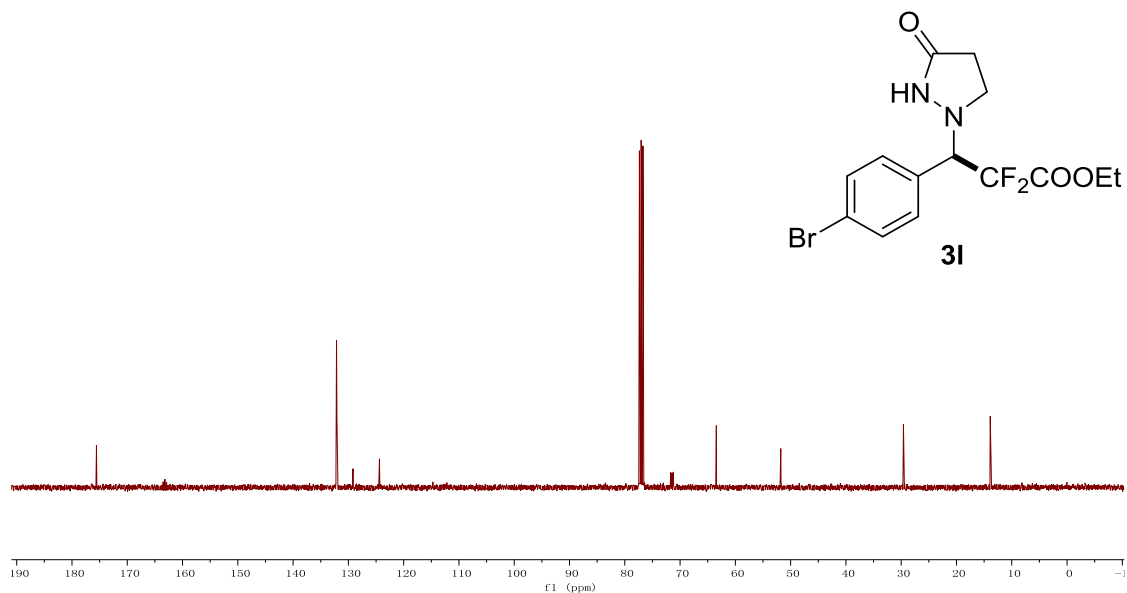

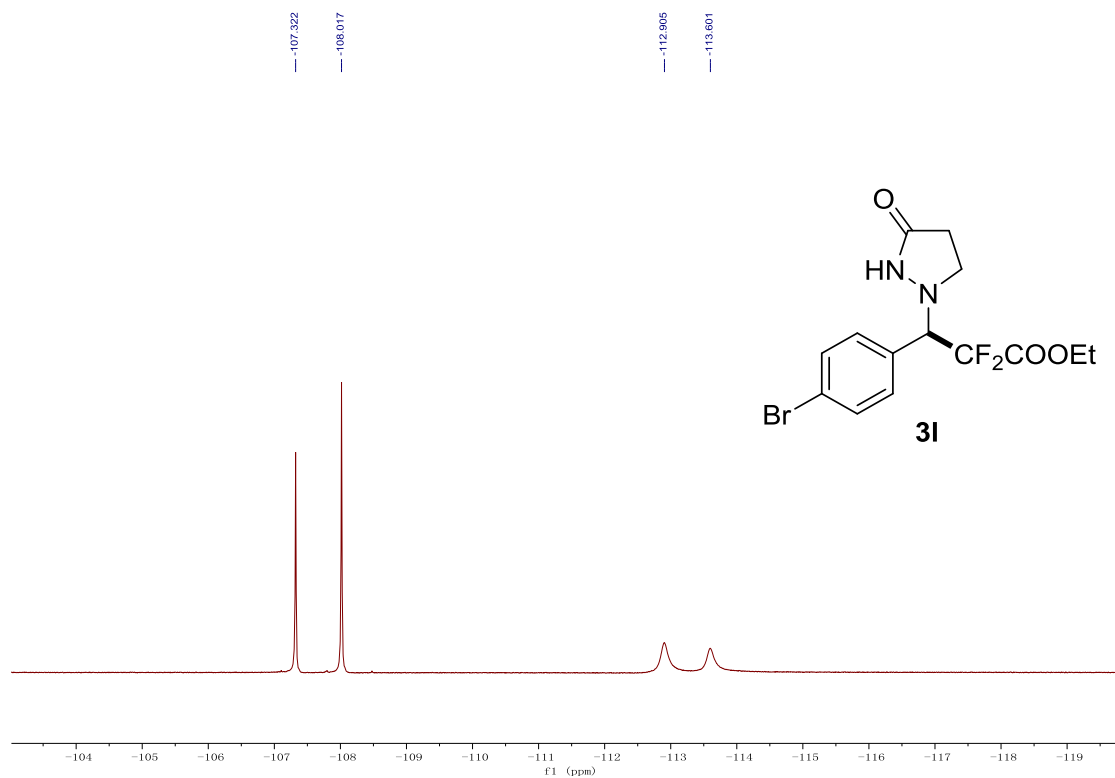

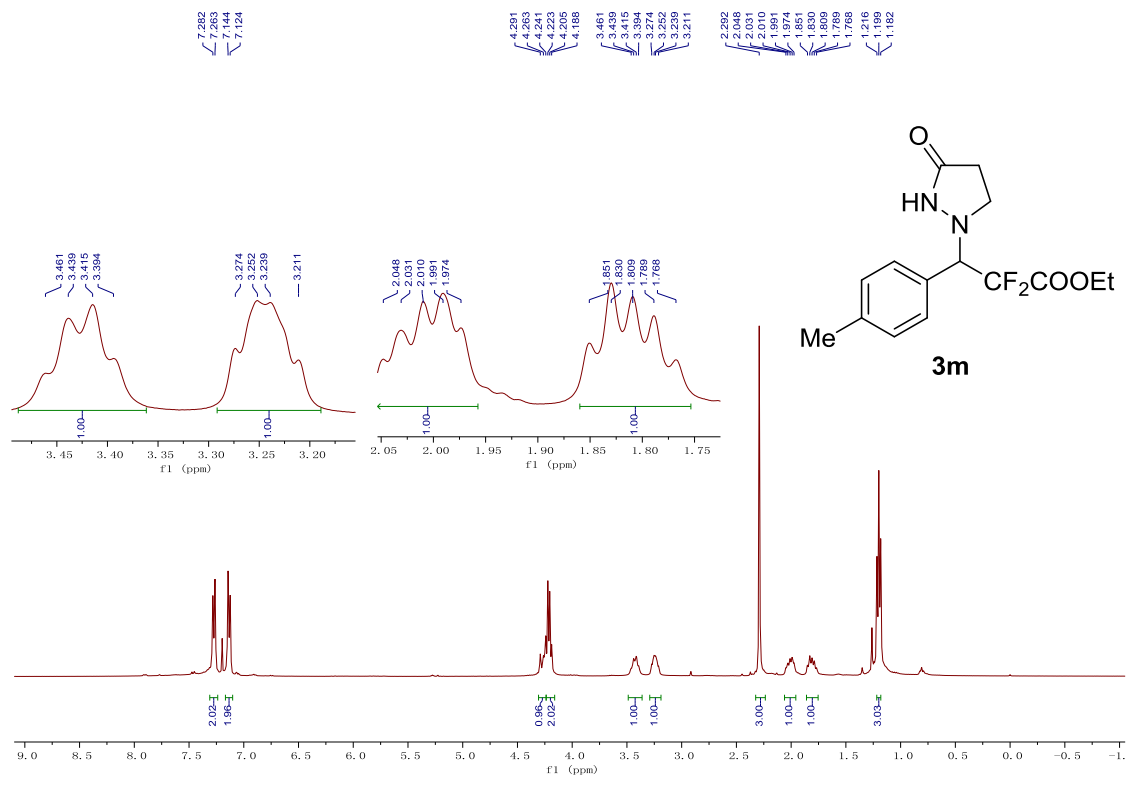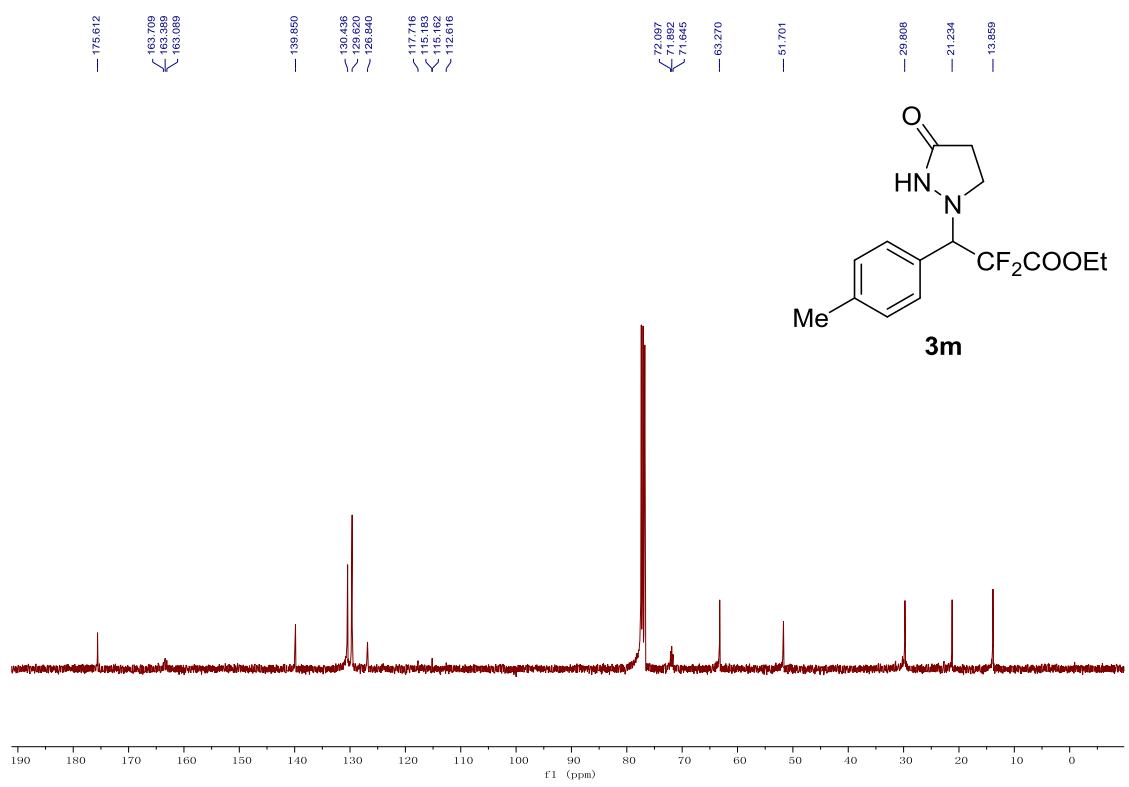



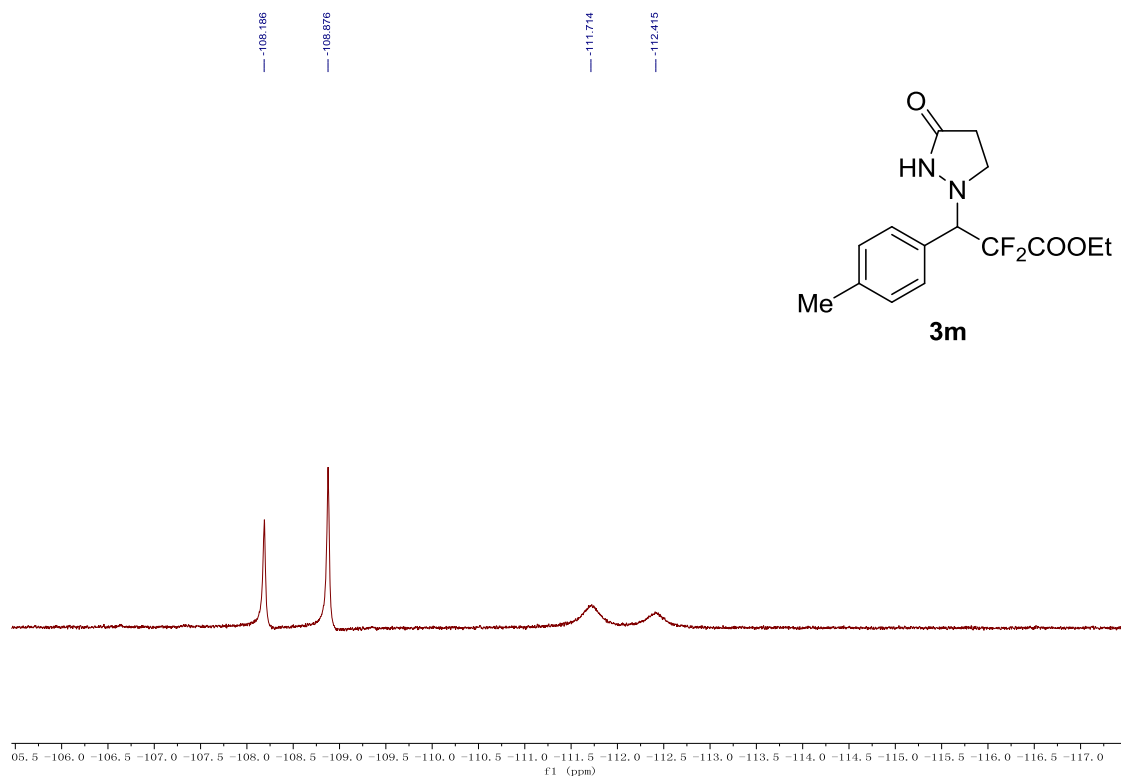

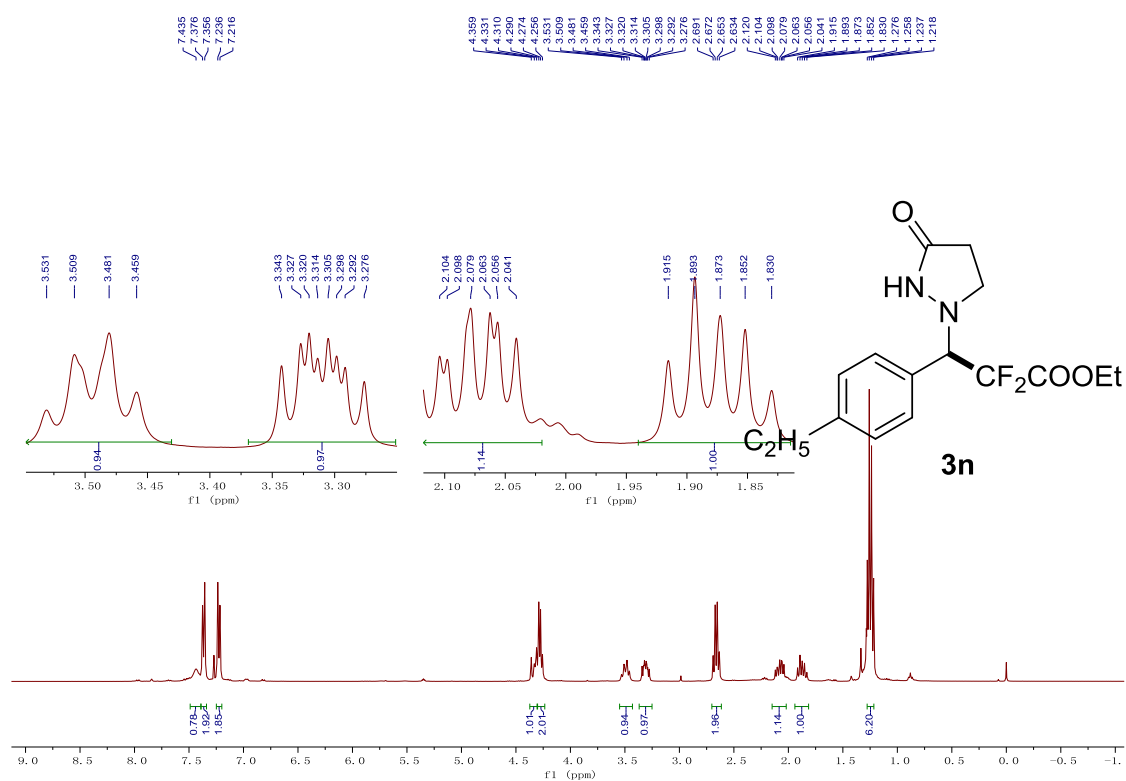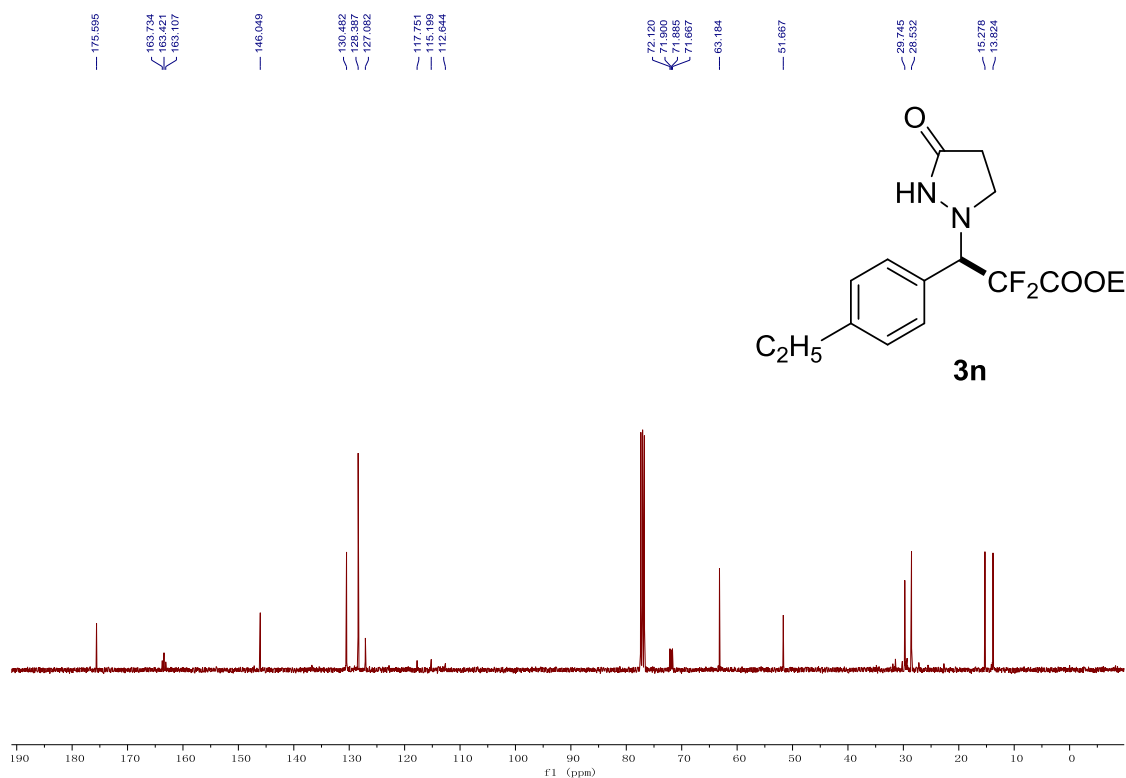

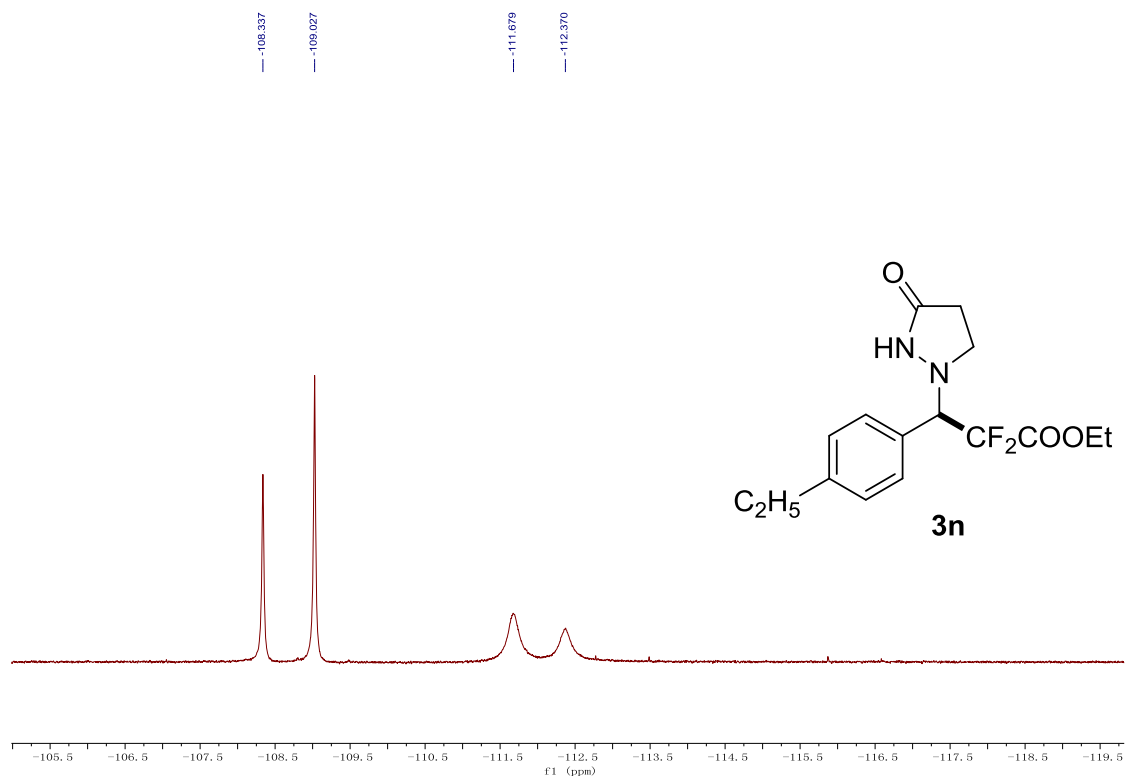

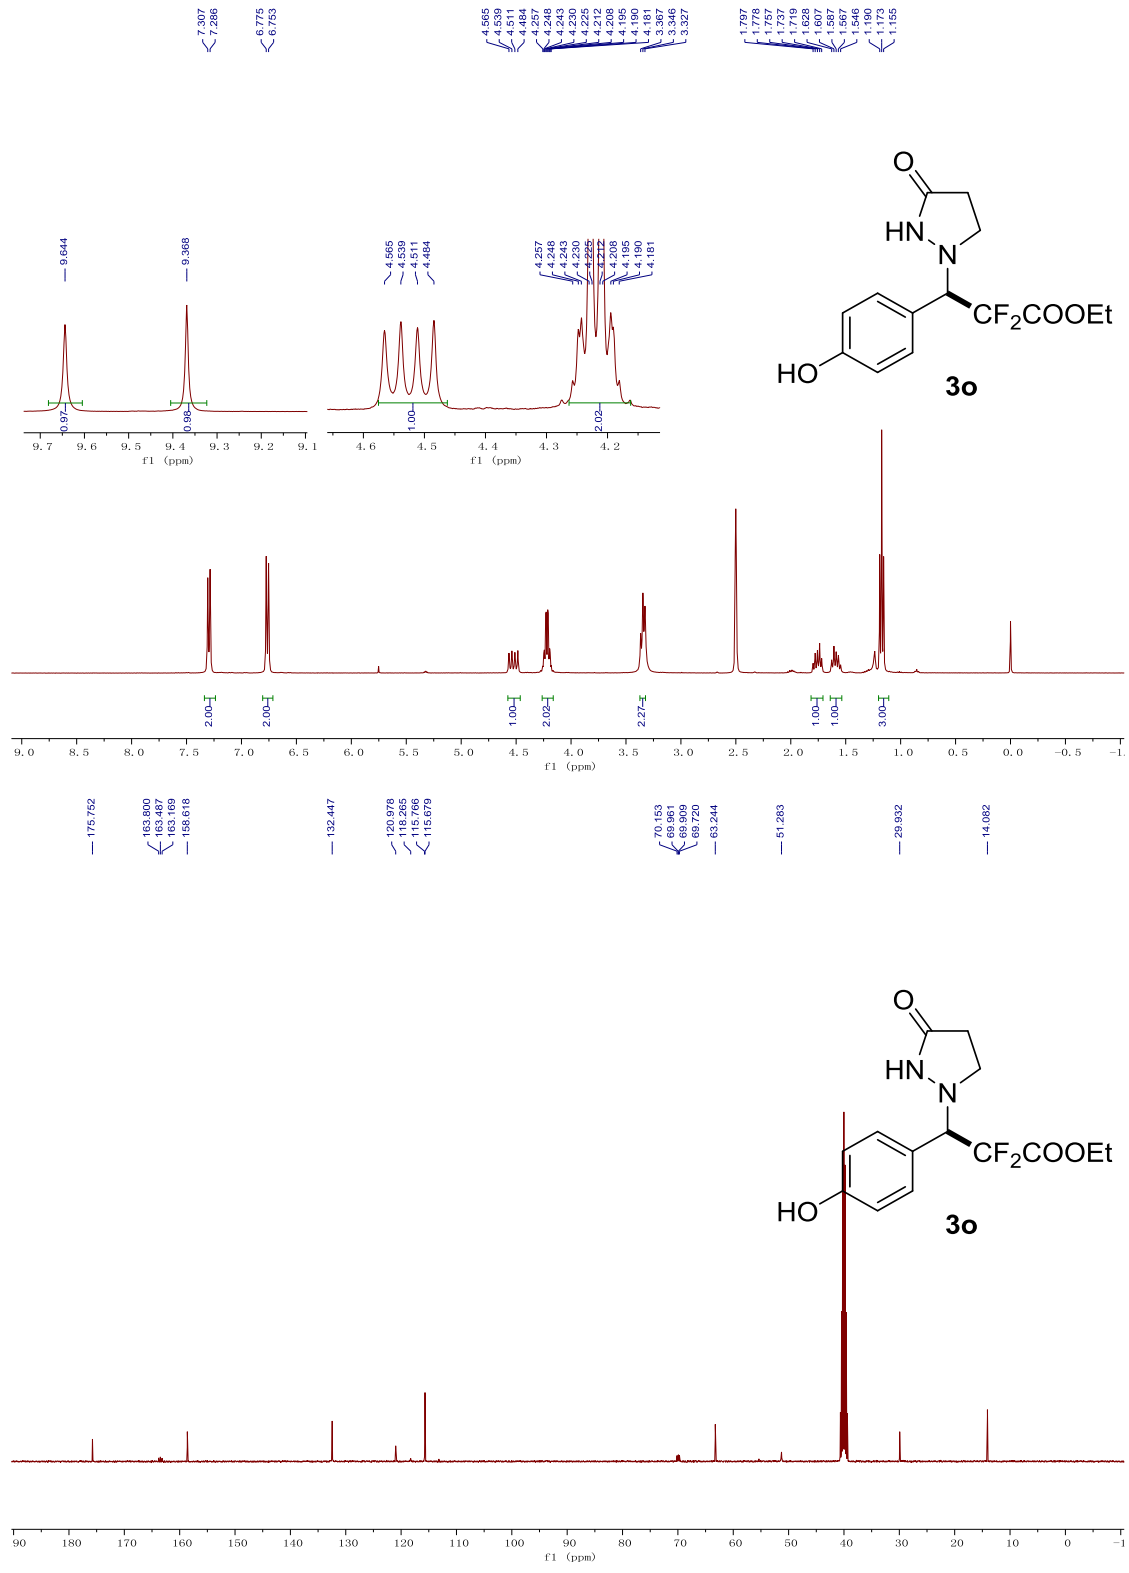

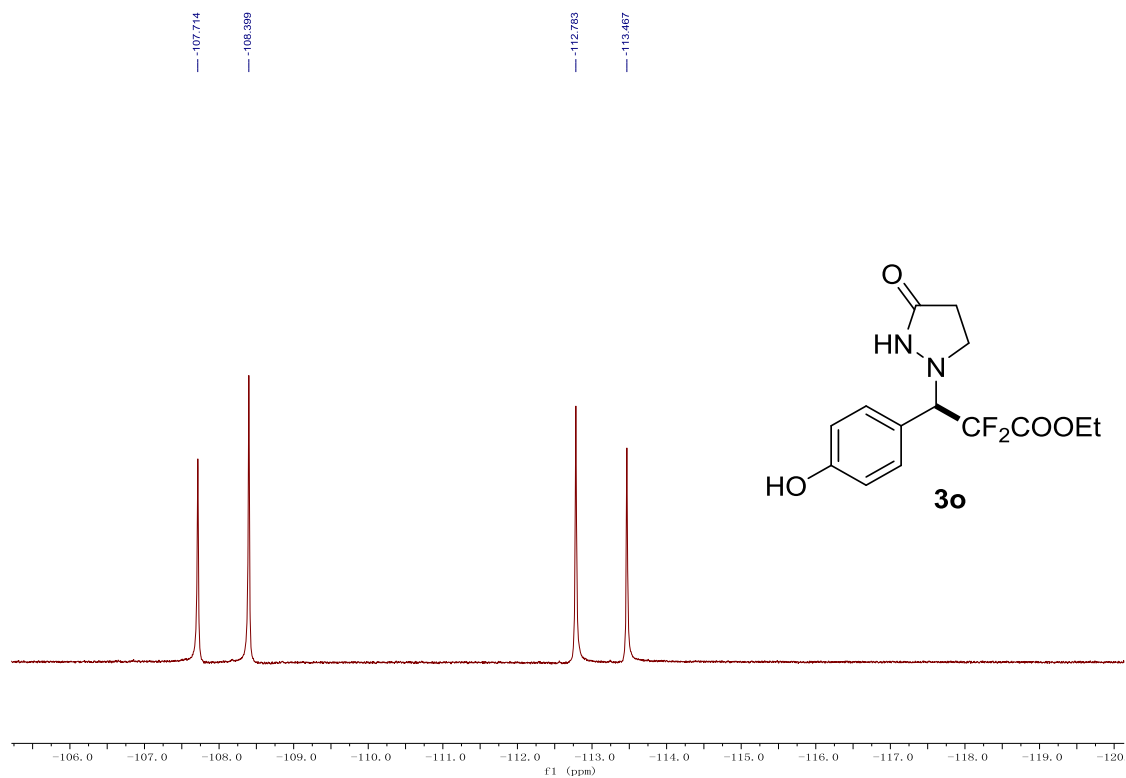

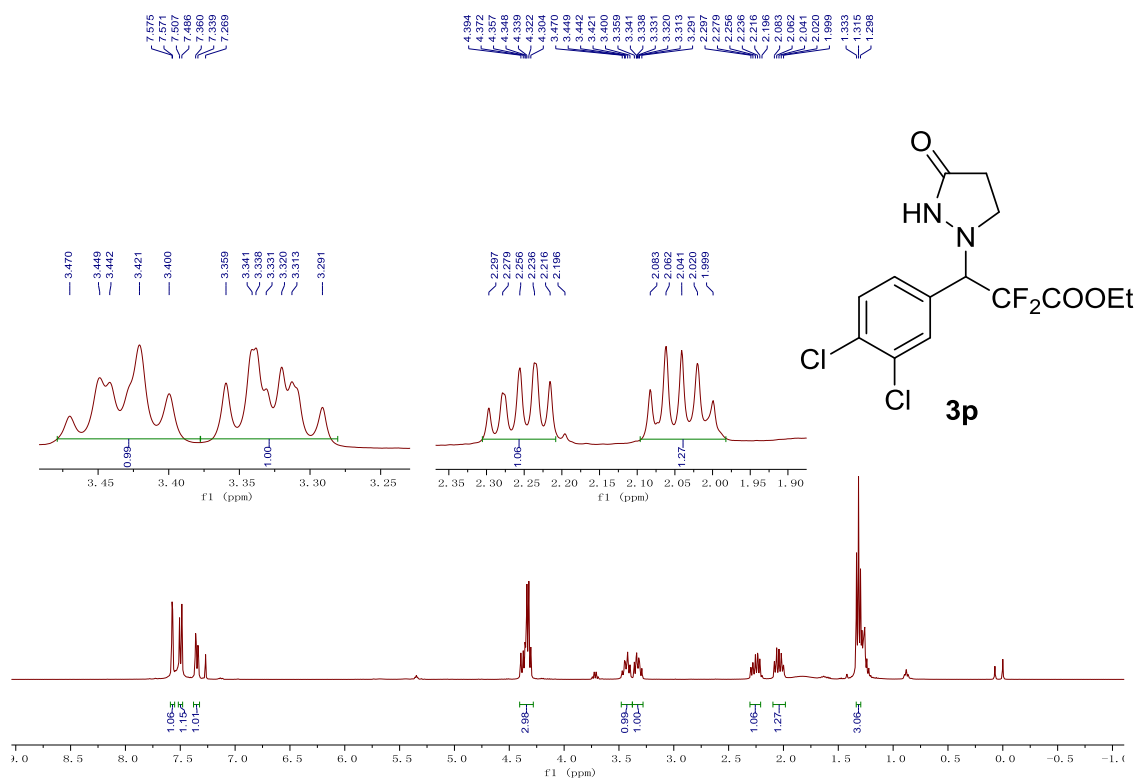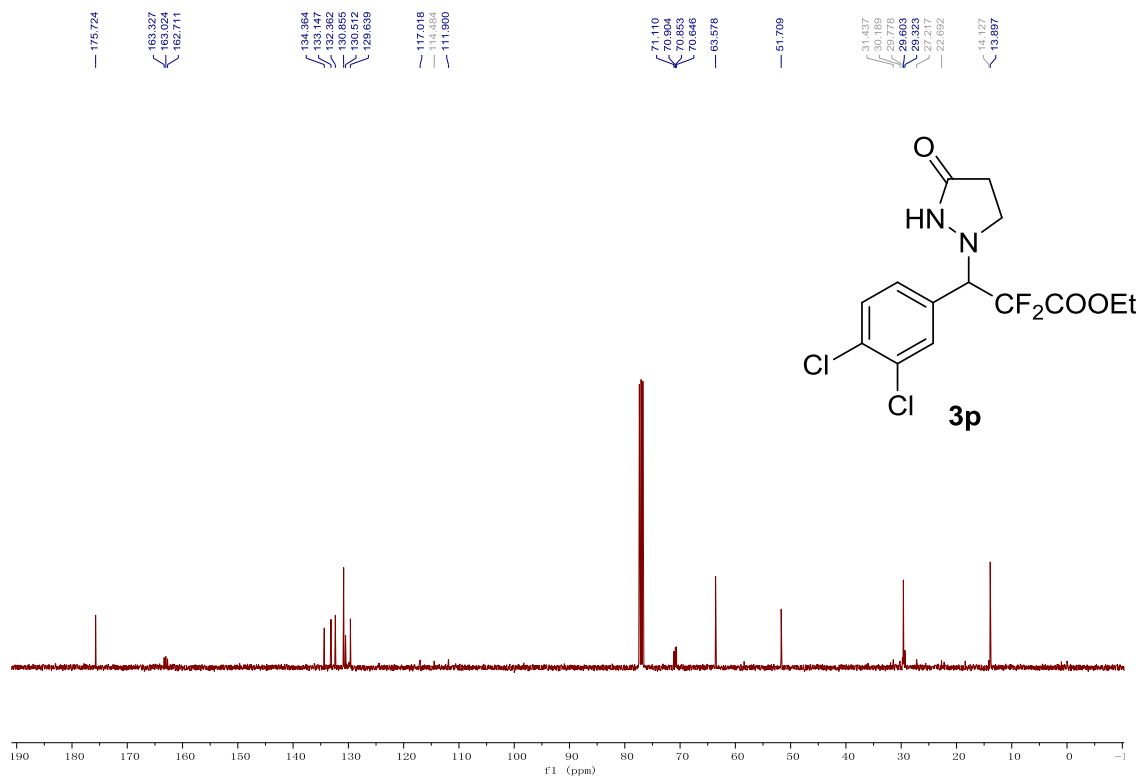

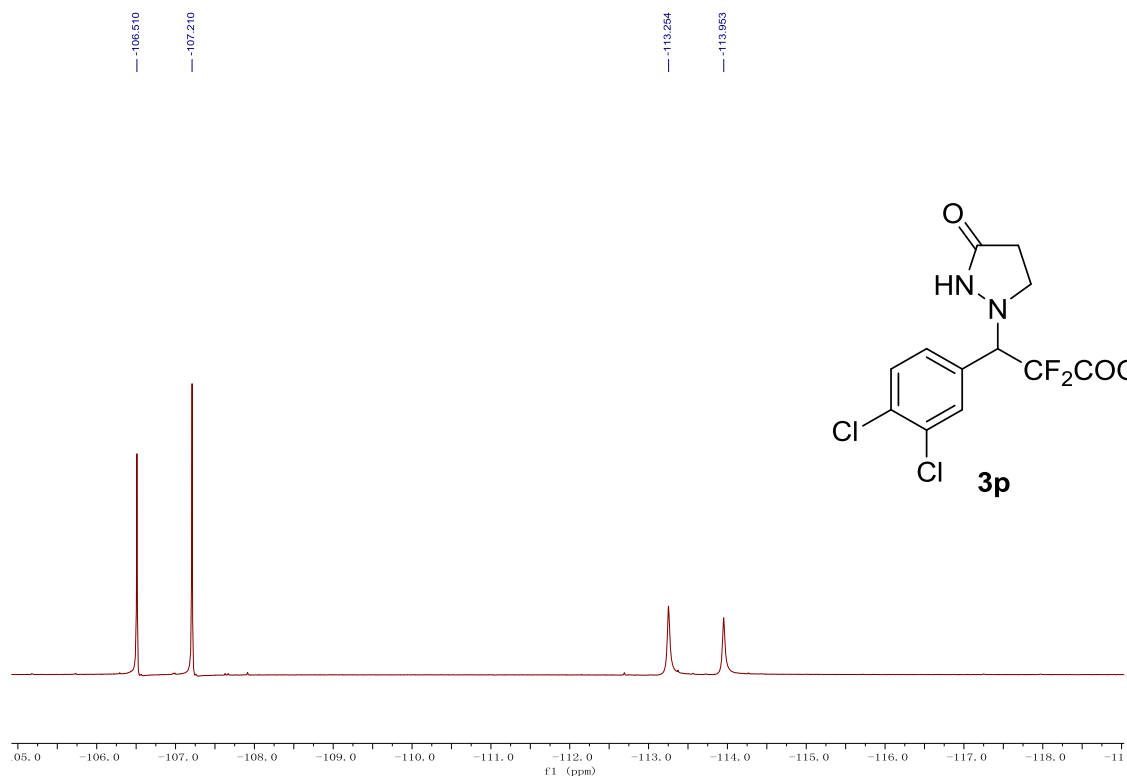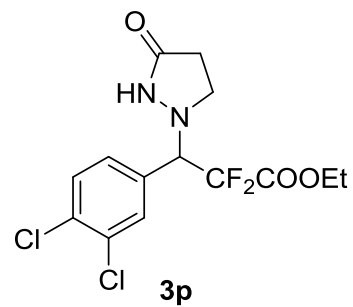

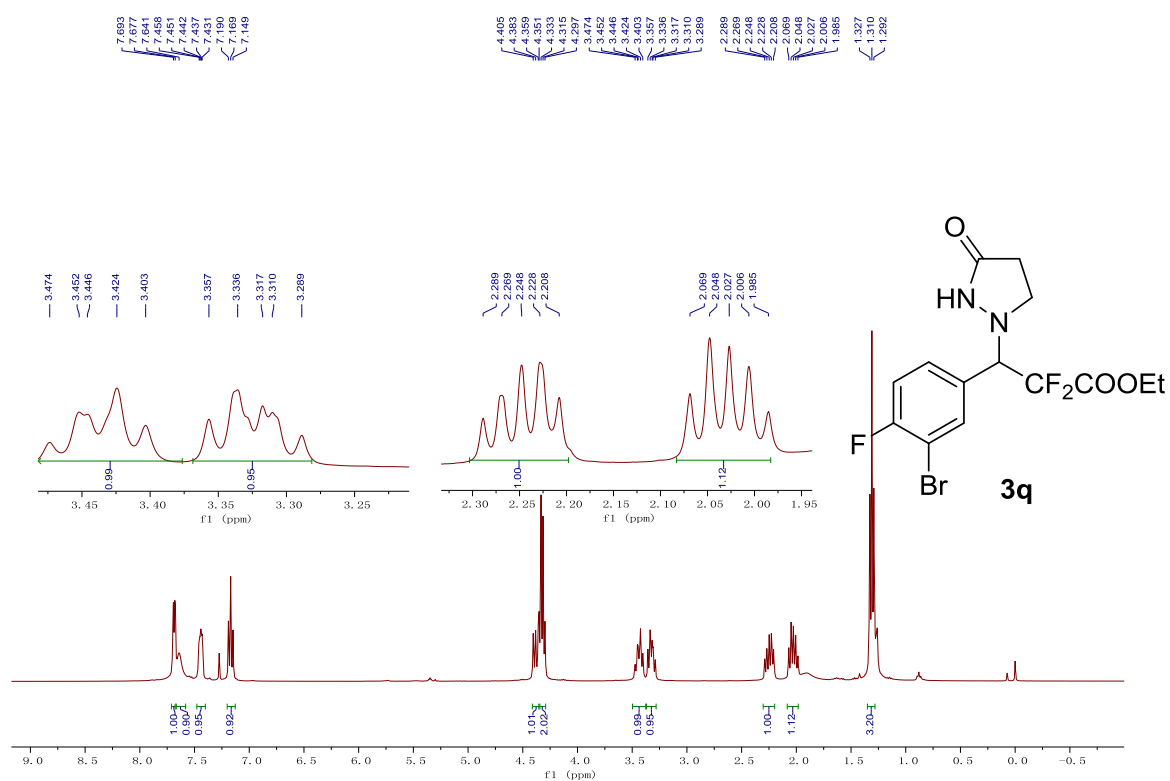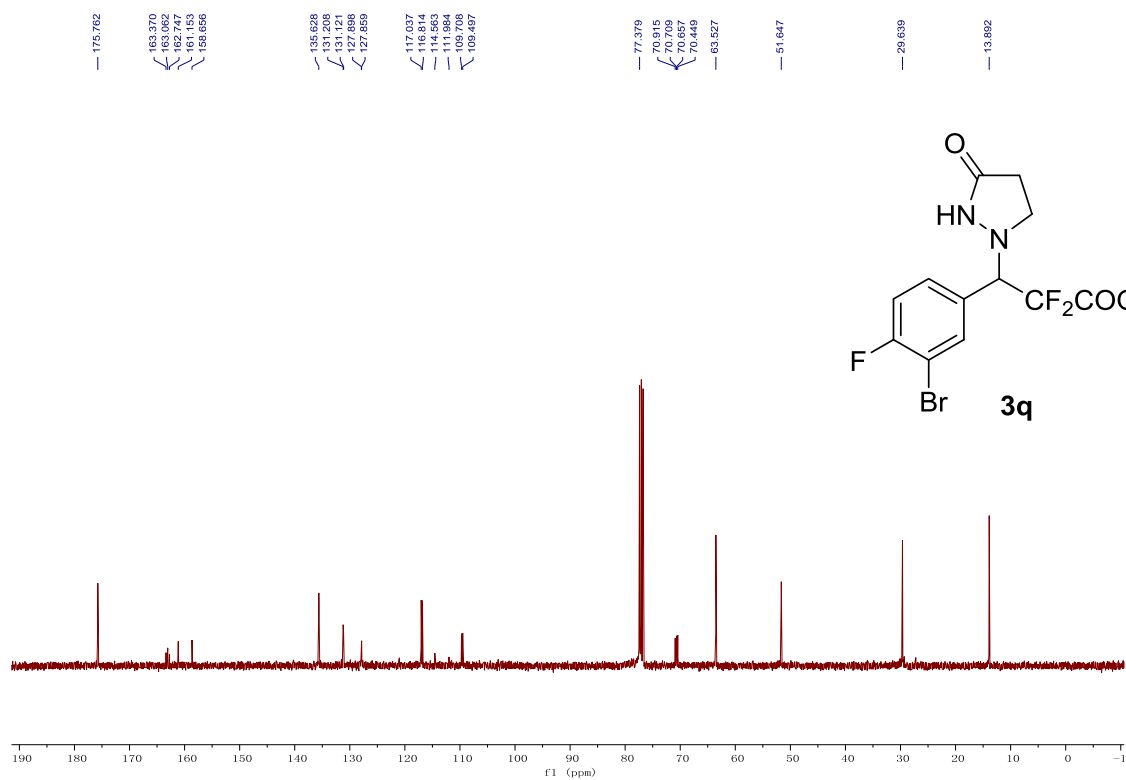



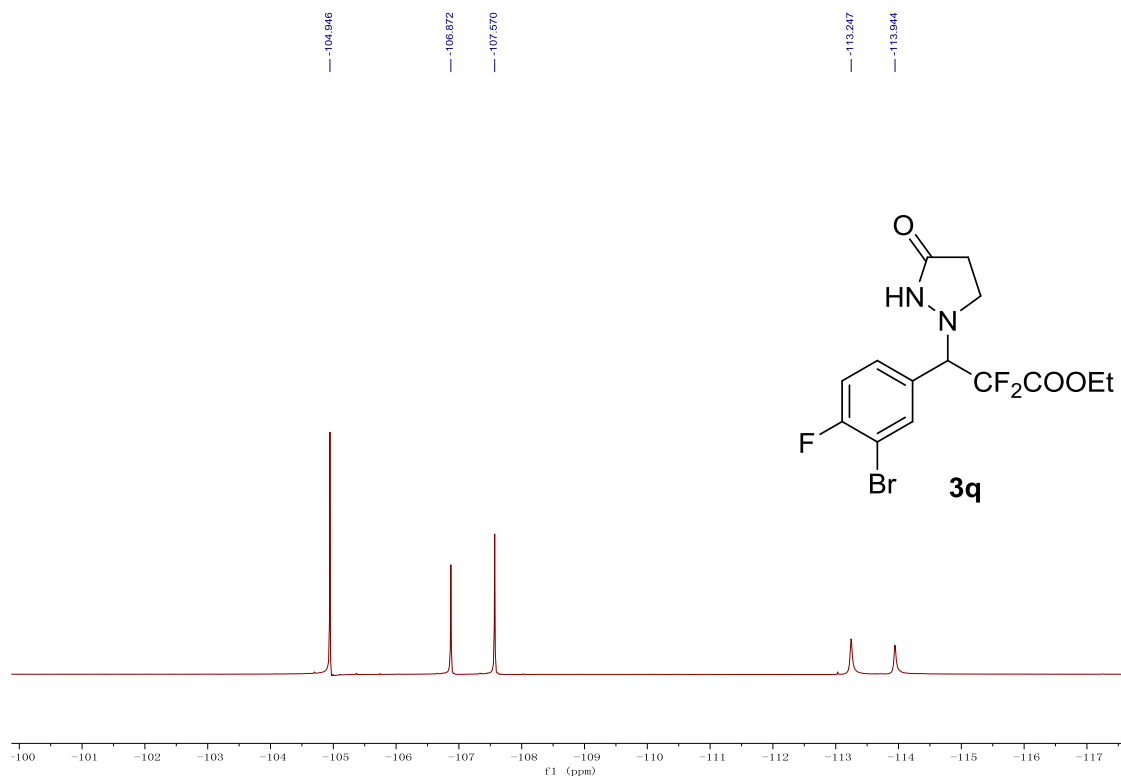

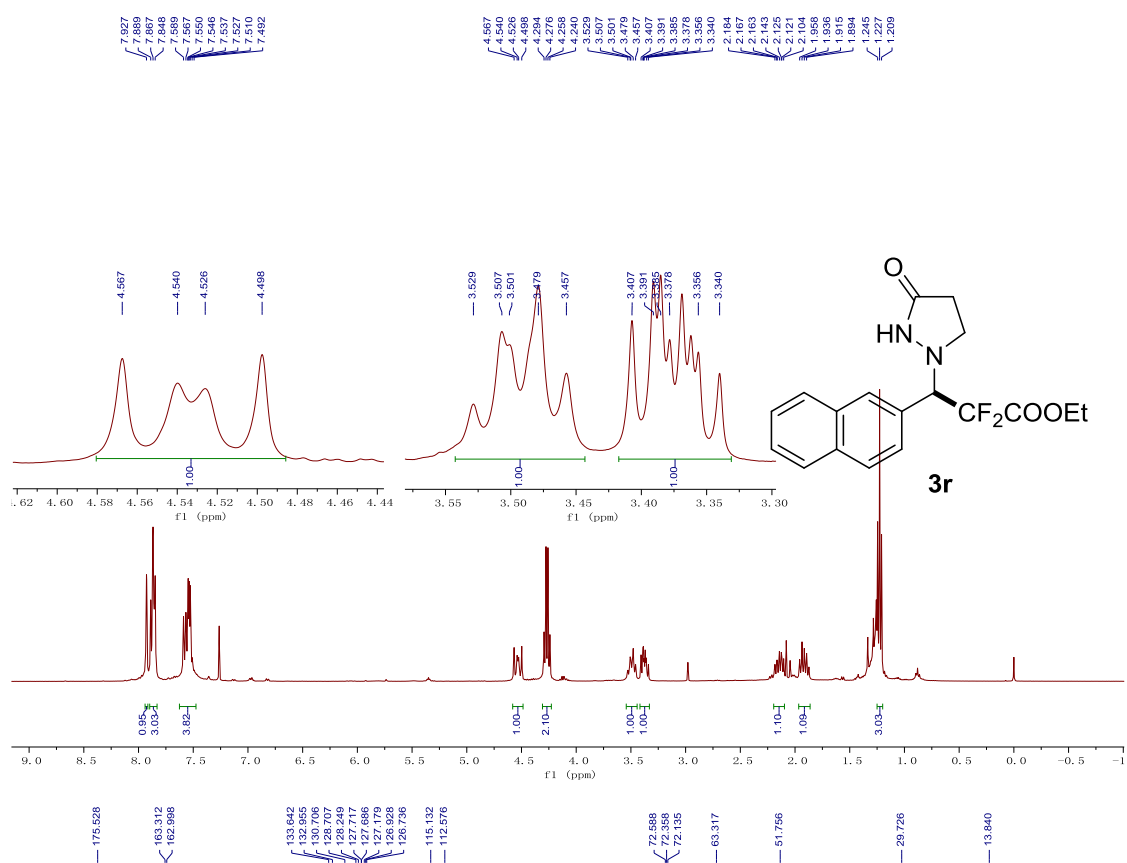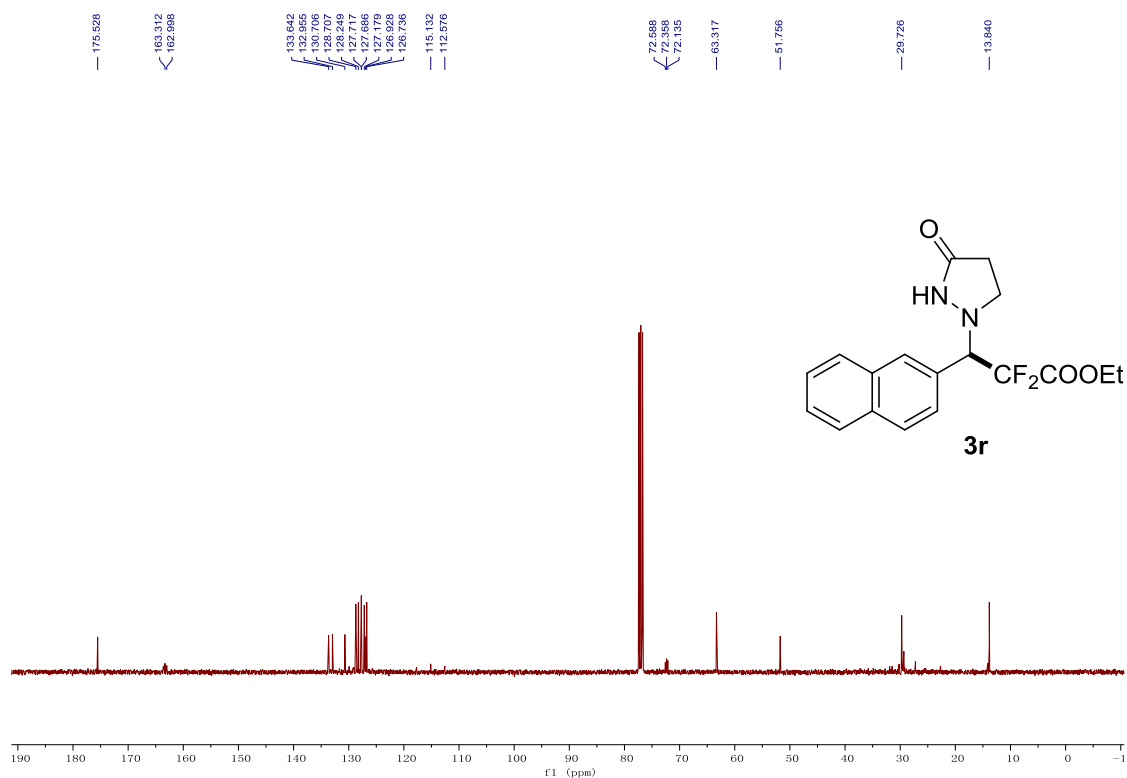

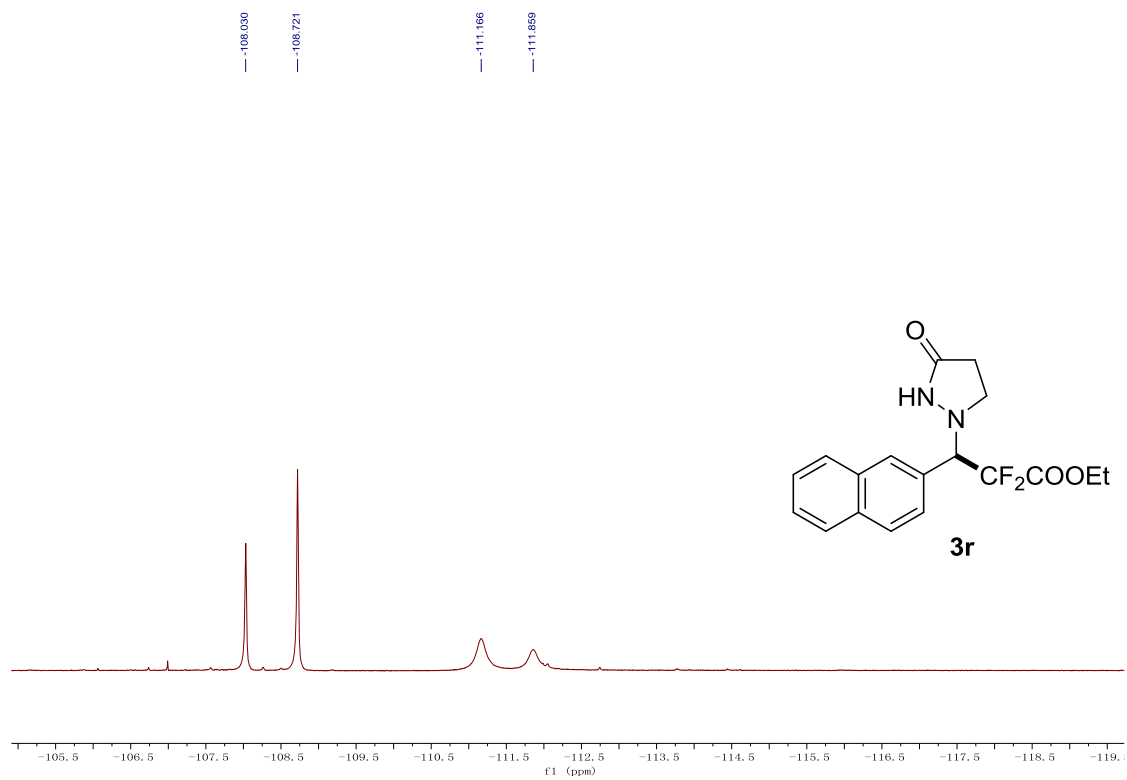

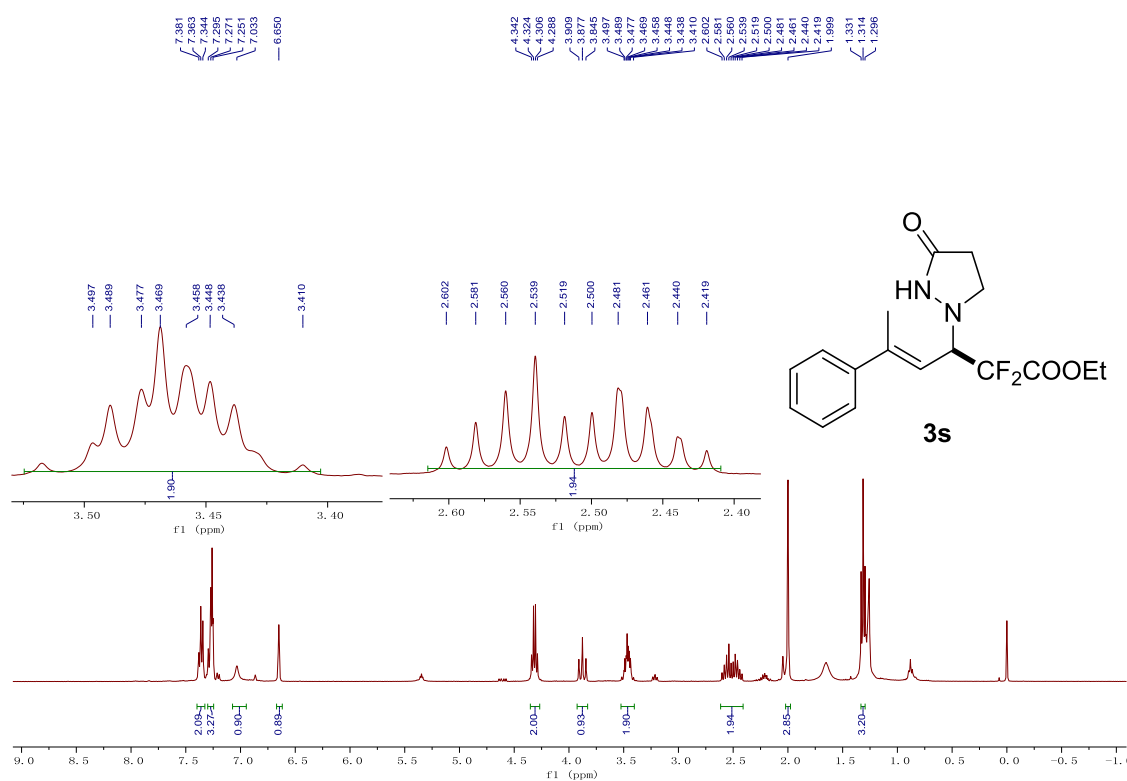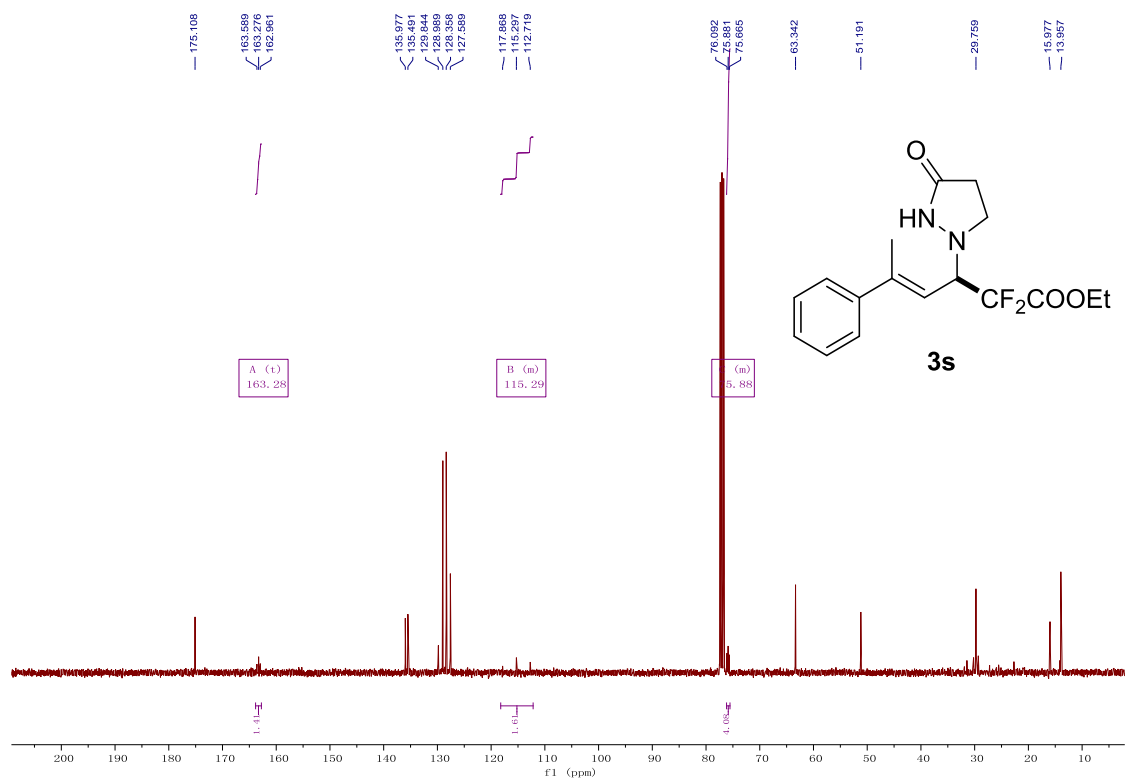

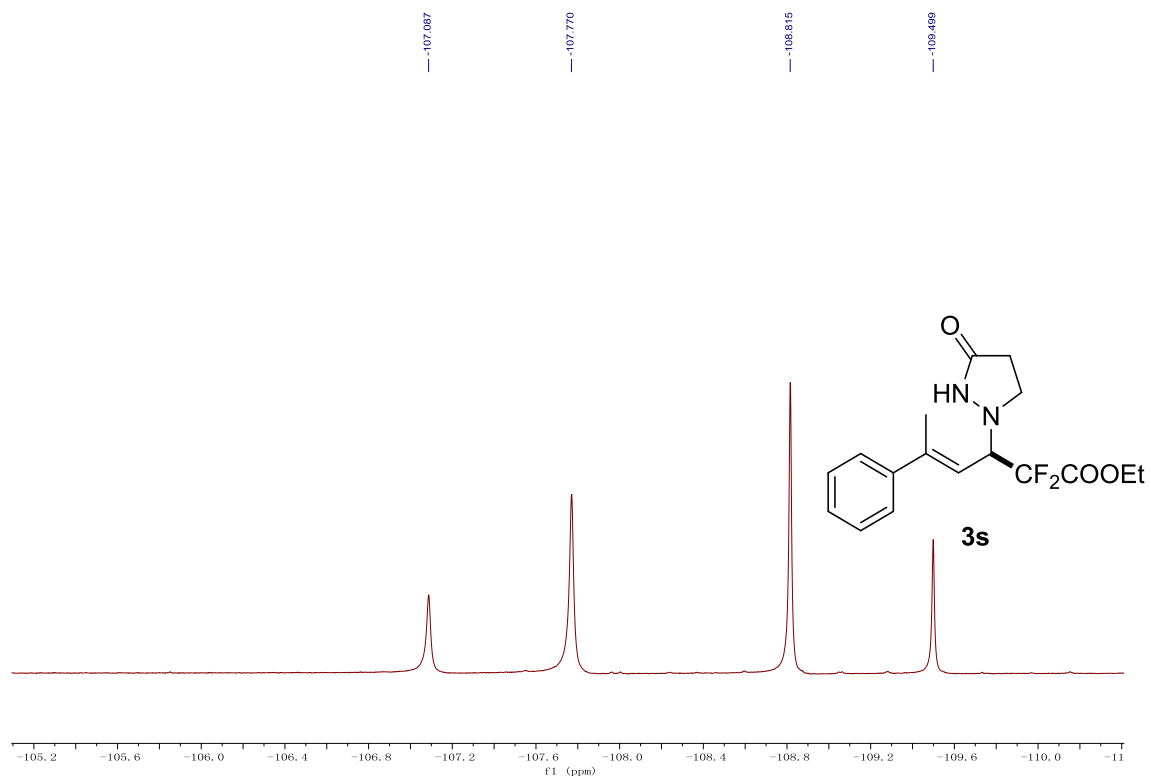

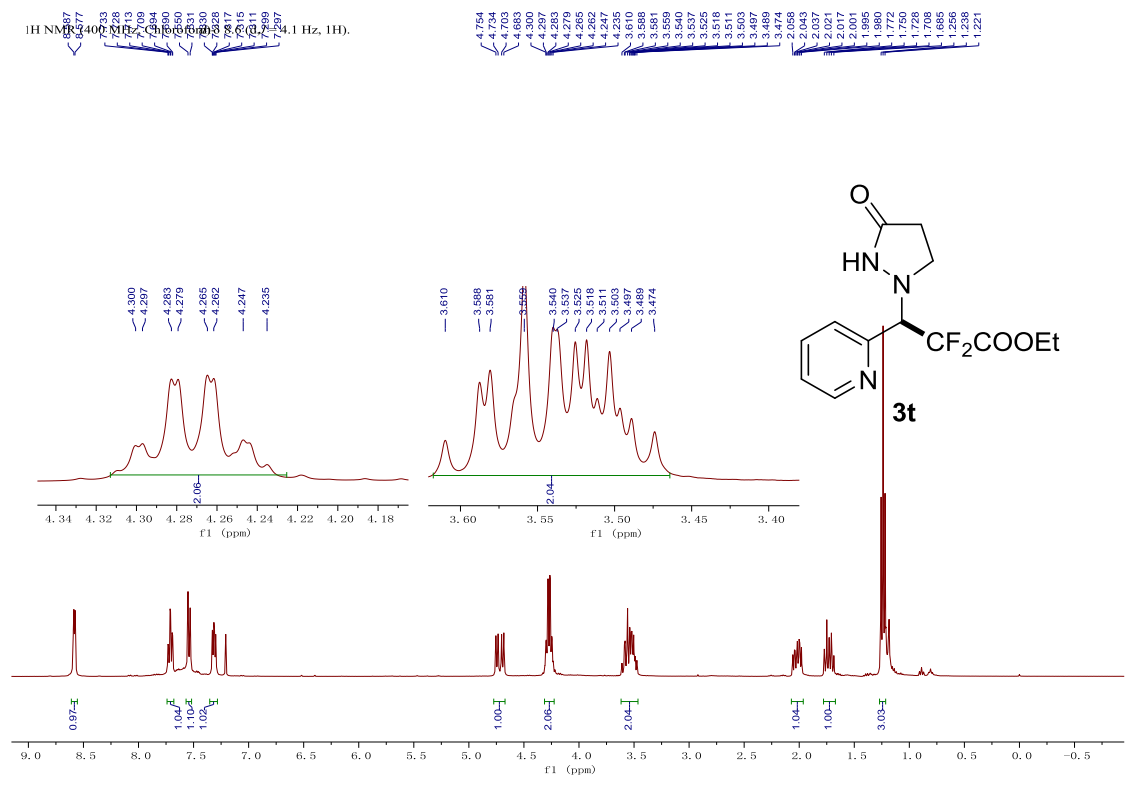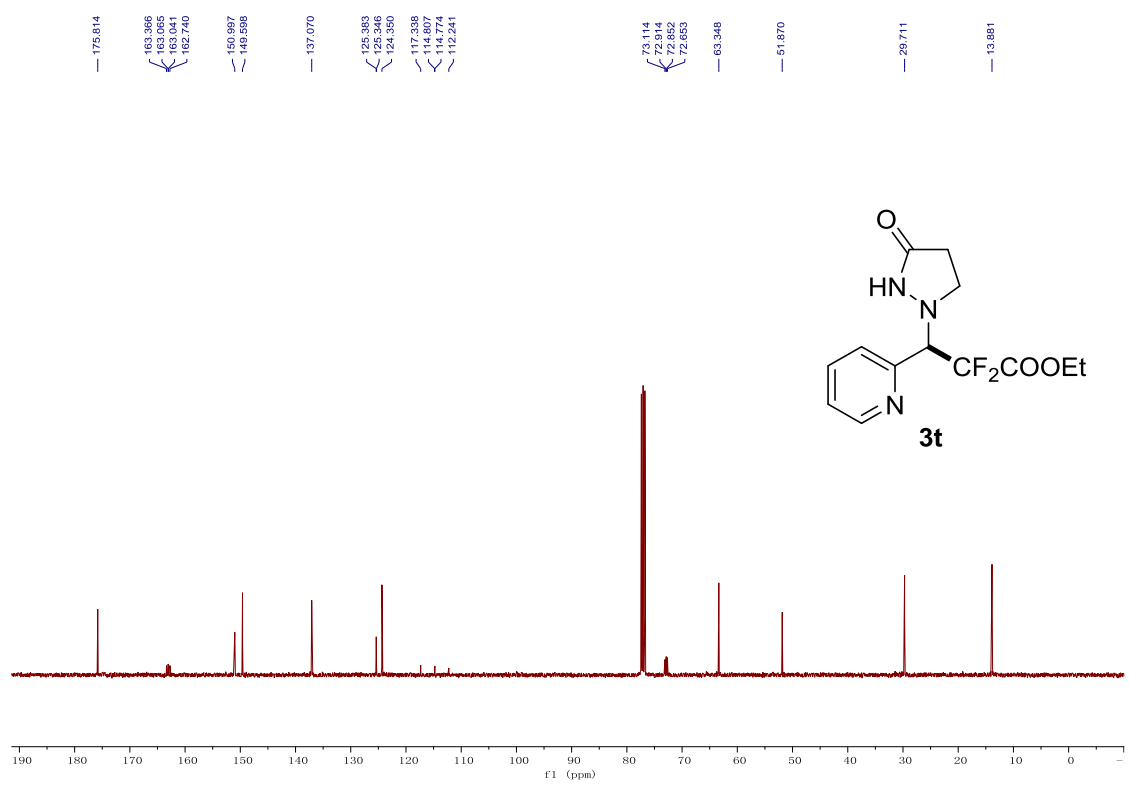

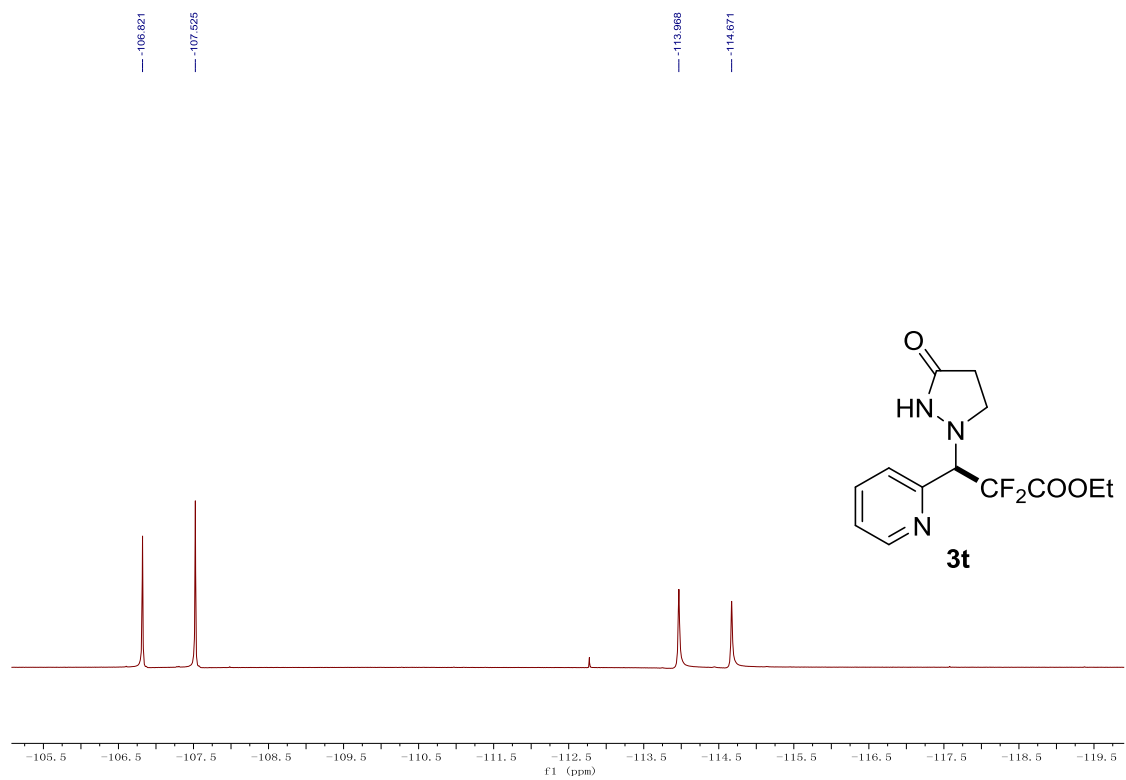

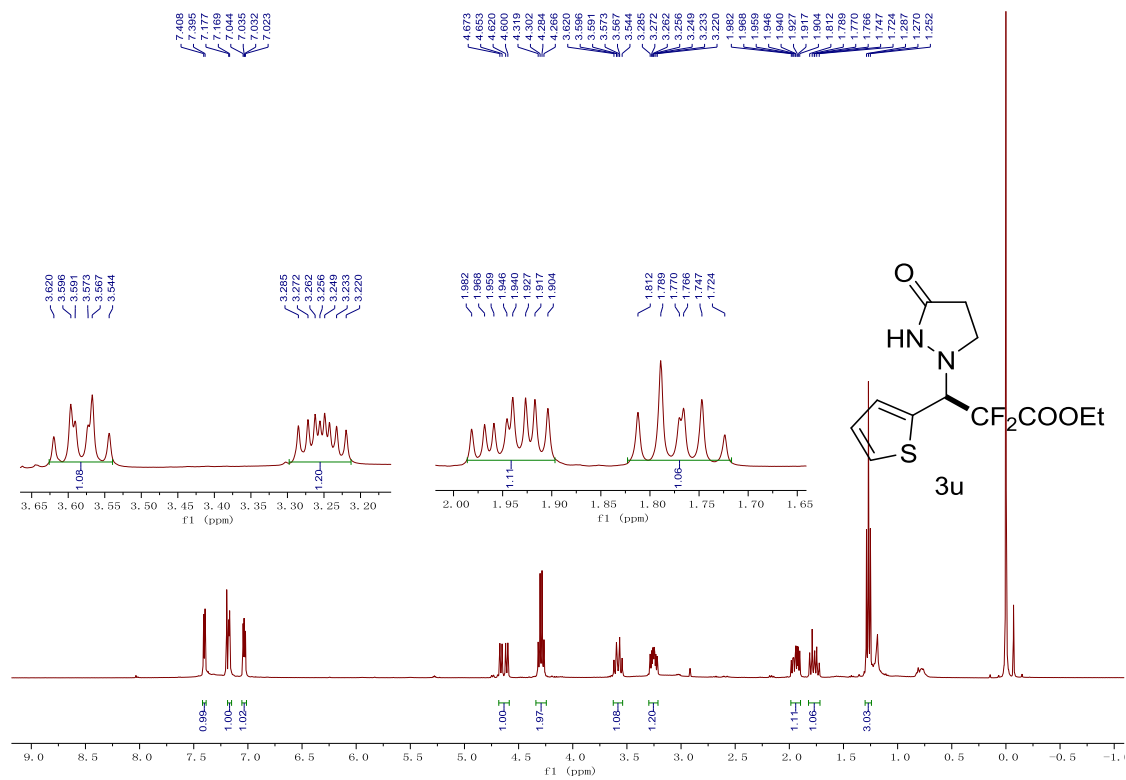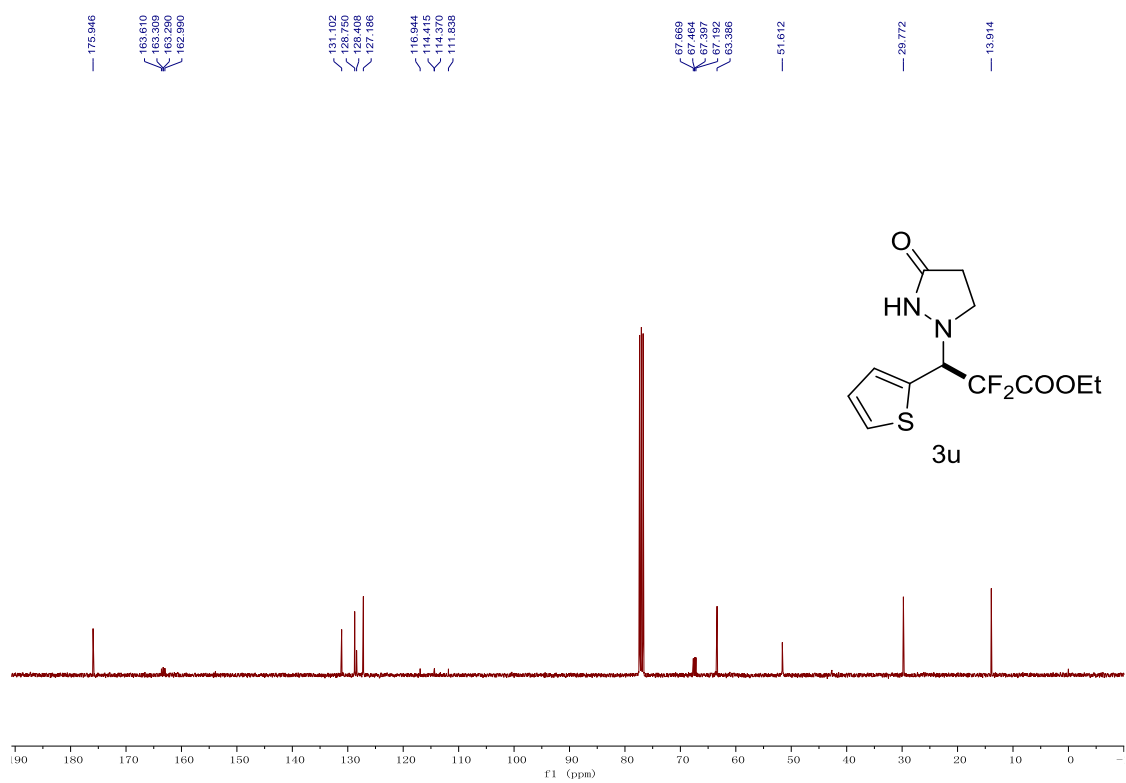



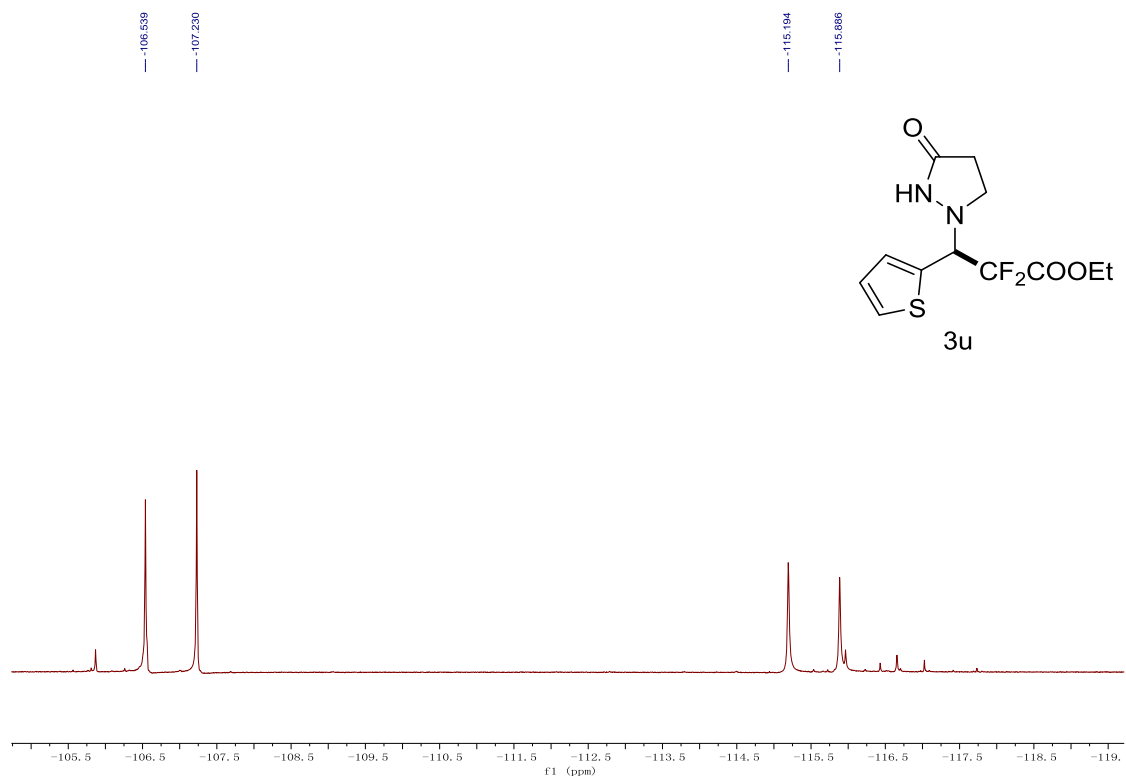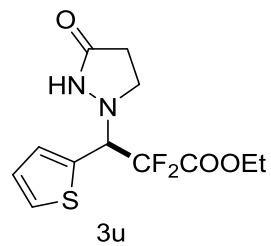

<sup>1</sup>H NMR (400 MHz, CDCl<sub>3</sub>) δ: 7.448, 7.431, 7.396, 7.379, 7.367, 7.349, 7.332, 7.300, 7.289, 7.281, 7.268, 7.260, 7.250, 7.251, 7.204, 7.186, 4.711, 4.689, 4.668, 4.646, 4.531, 4.510, 2.754, 2.733, 2.712, 2.691, 2.246, 2.210, 2.205, 1.232, 1.214, 1.186

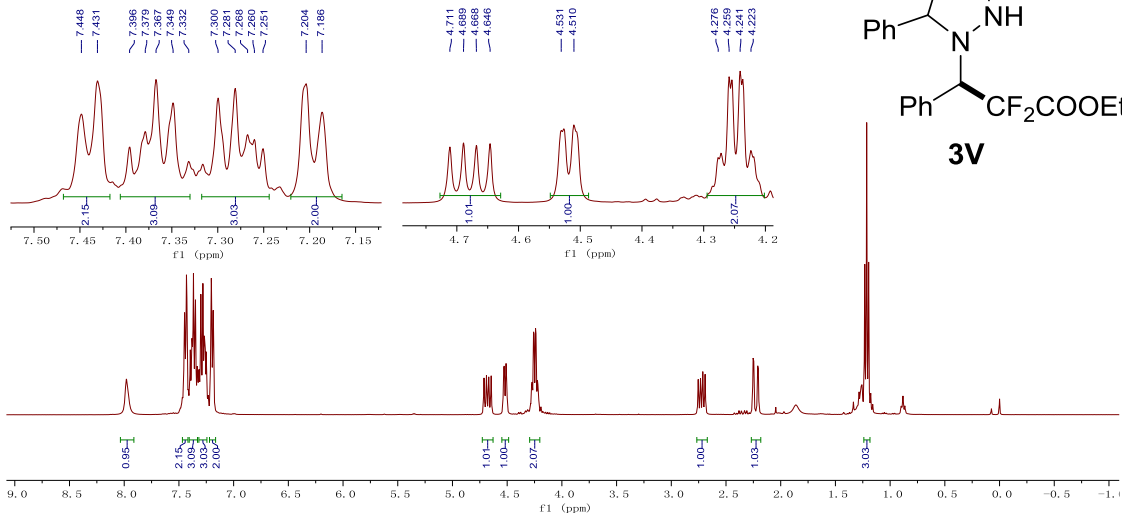

175.253, 163.851, 163.539, 163.224, 140.200, 131.349, 129.943, 129.843, 128.871, 128.695, 127.688, 126.279, 117.279, 114.753, 114.566, 112.166, 71.914, 71.711, 71.467, 63.363, 35.954, 13.814

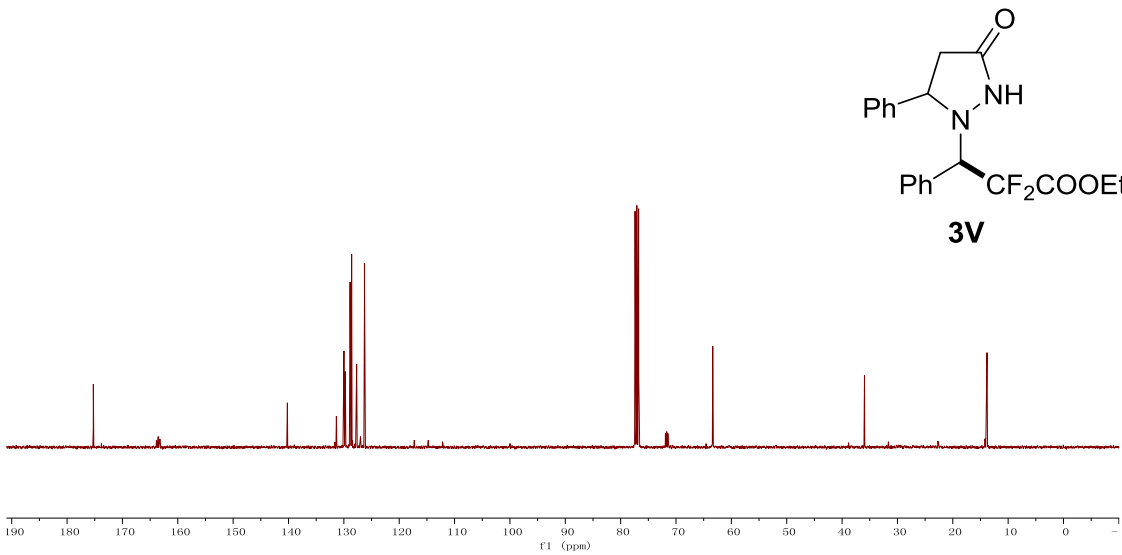

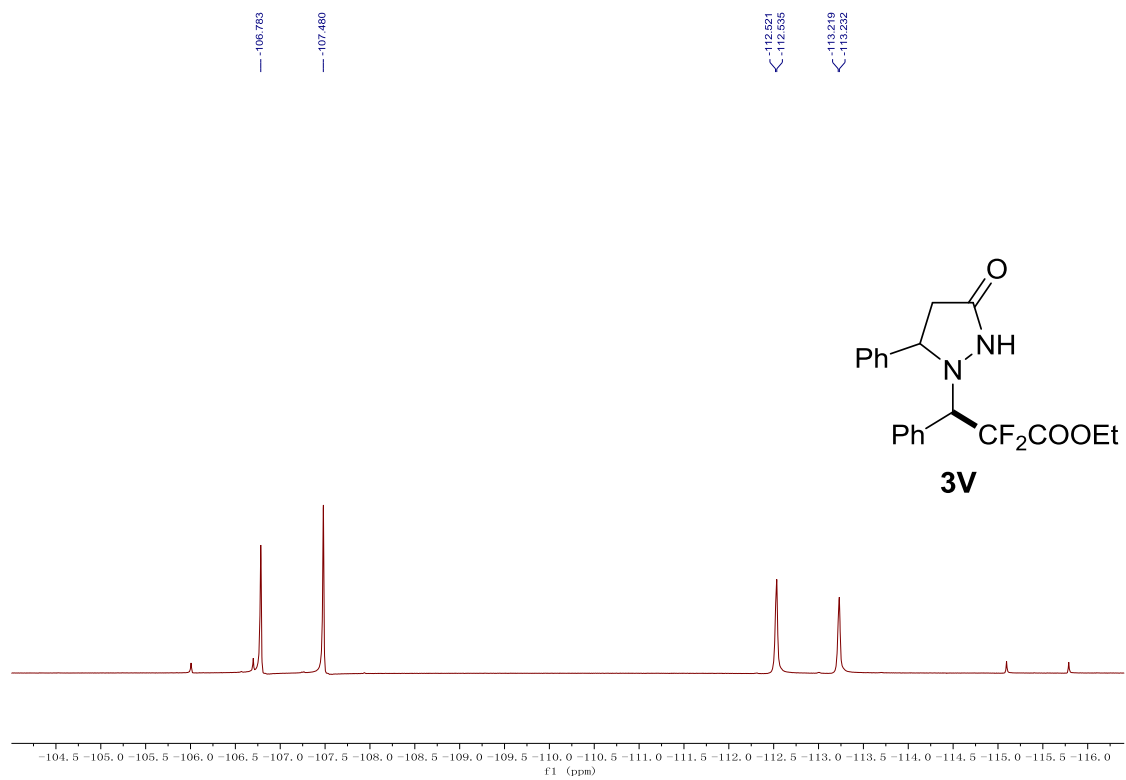



-106.576  
-106.599  
-107.275  
-107.288

-113.054  
-113.249  
-113.754  
-113.948

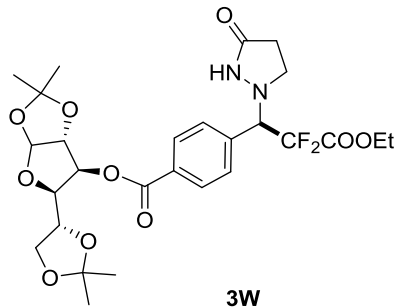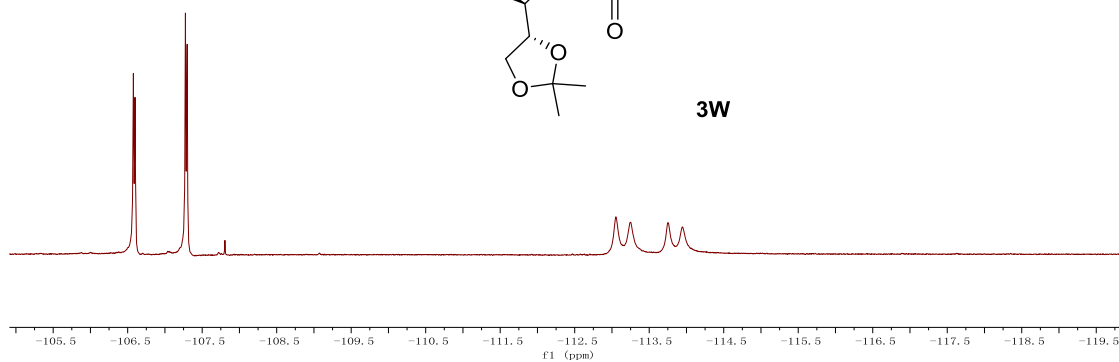

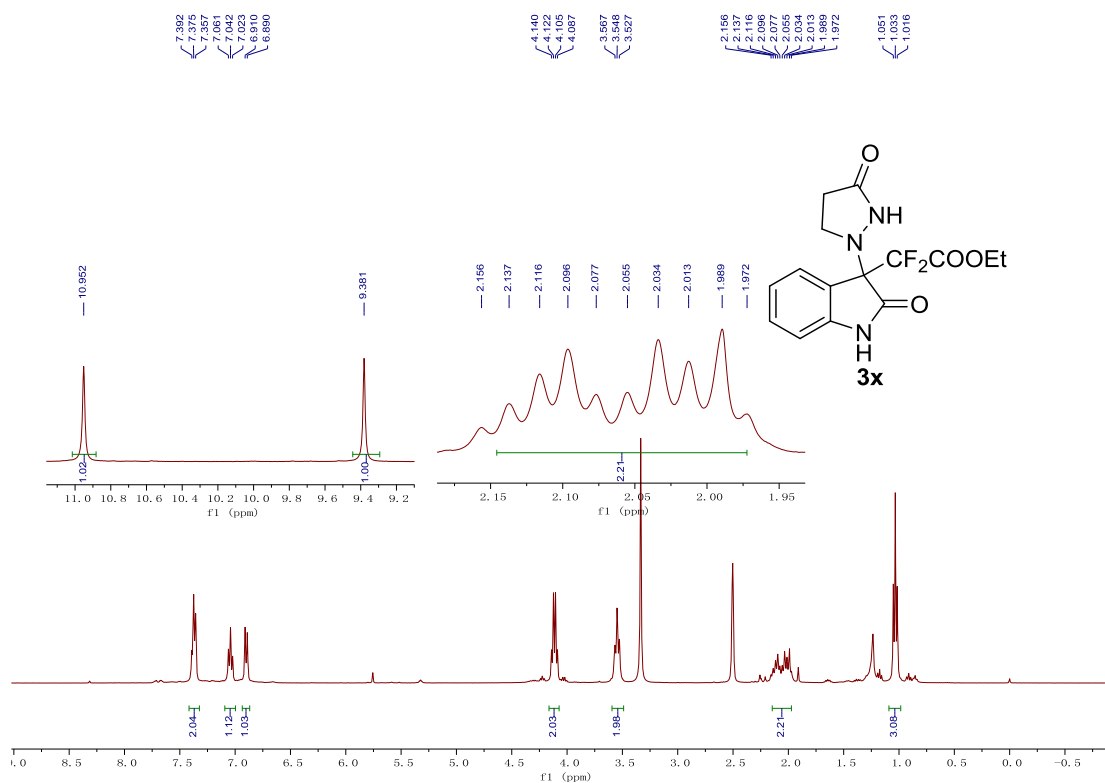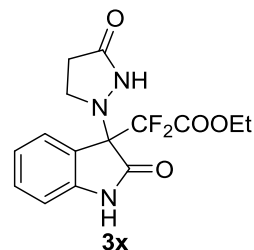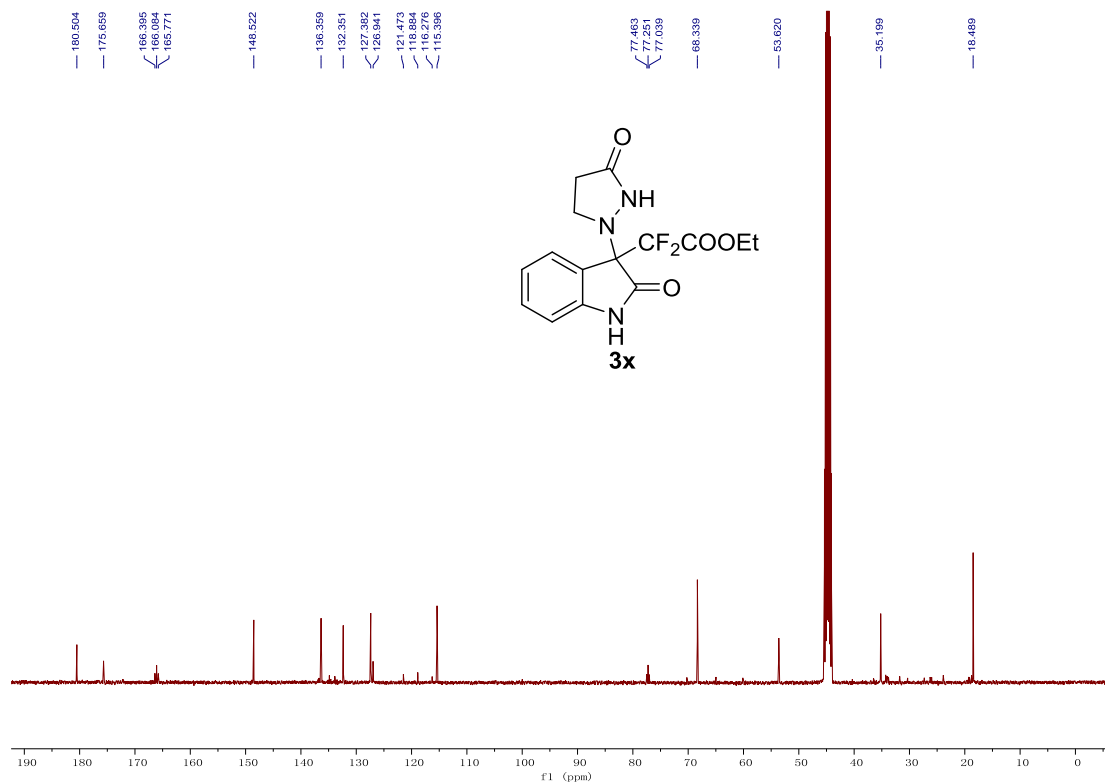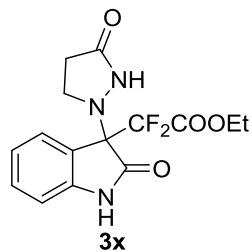

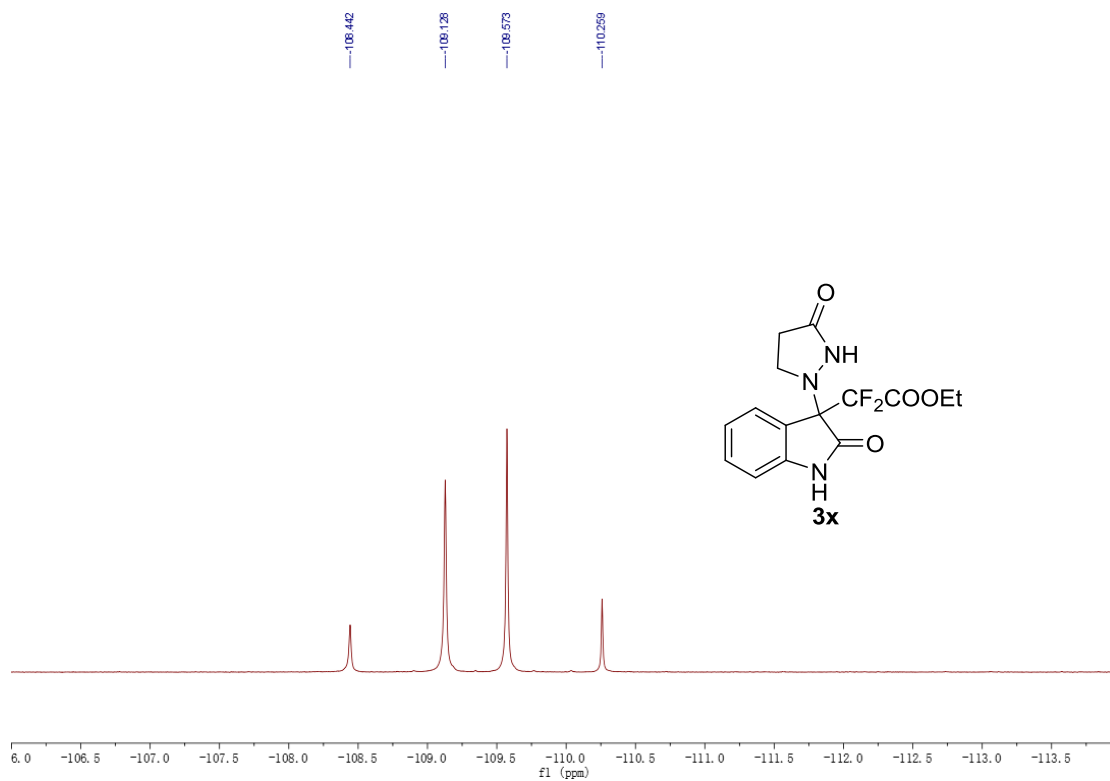

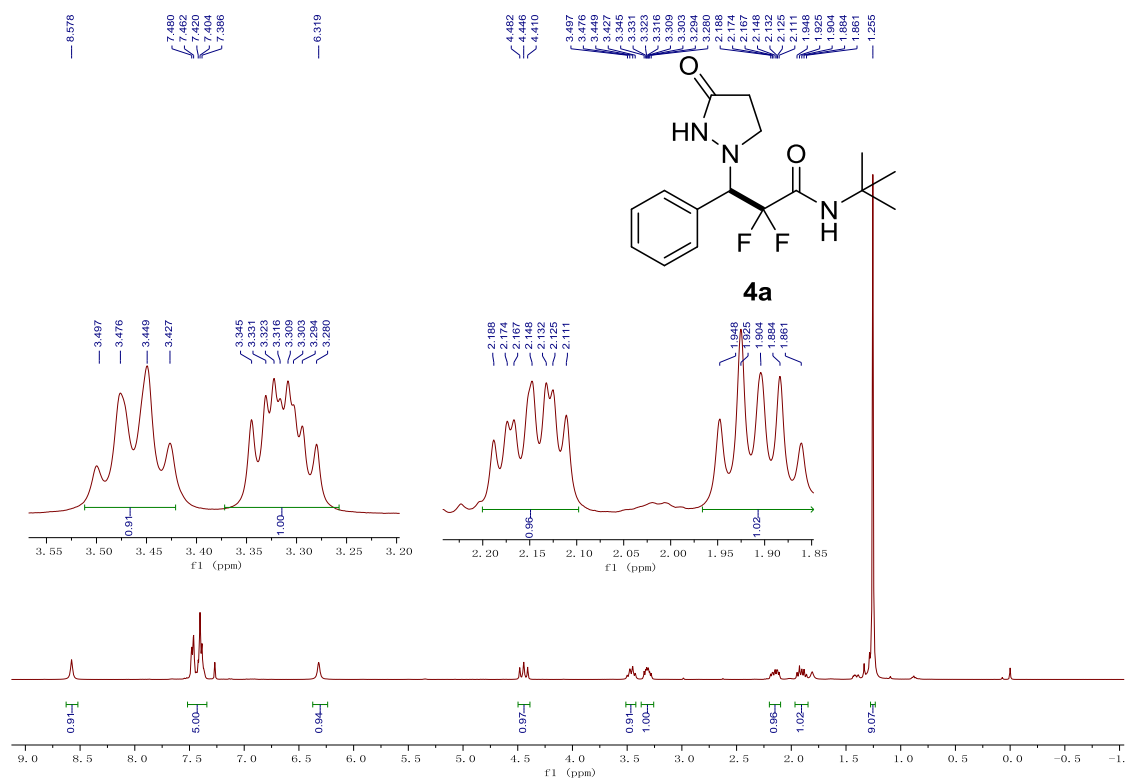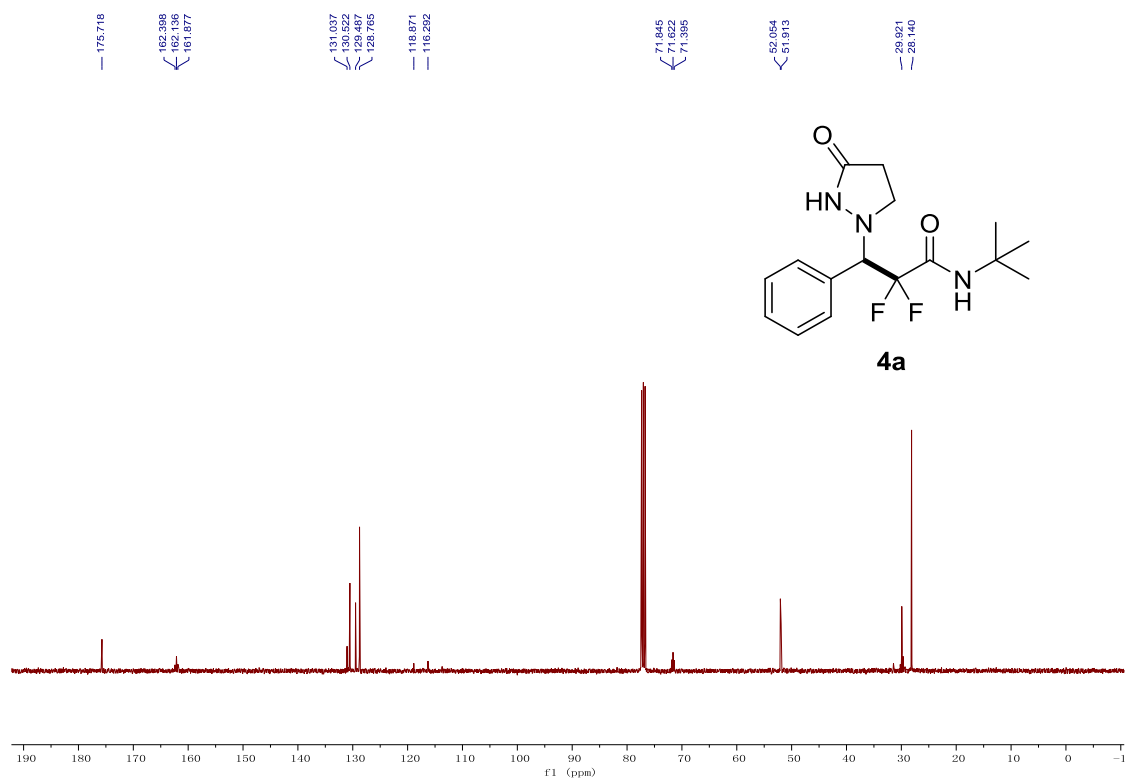



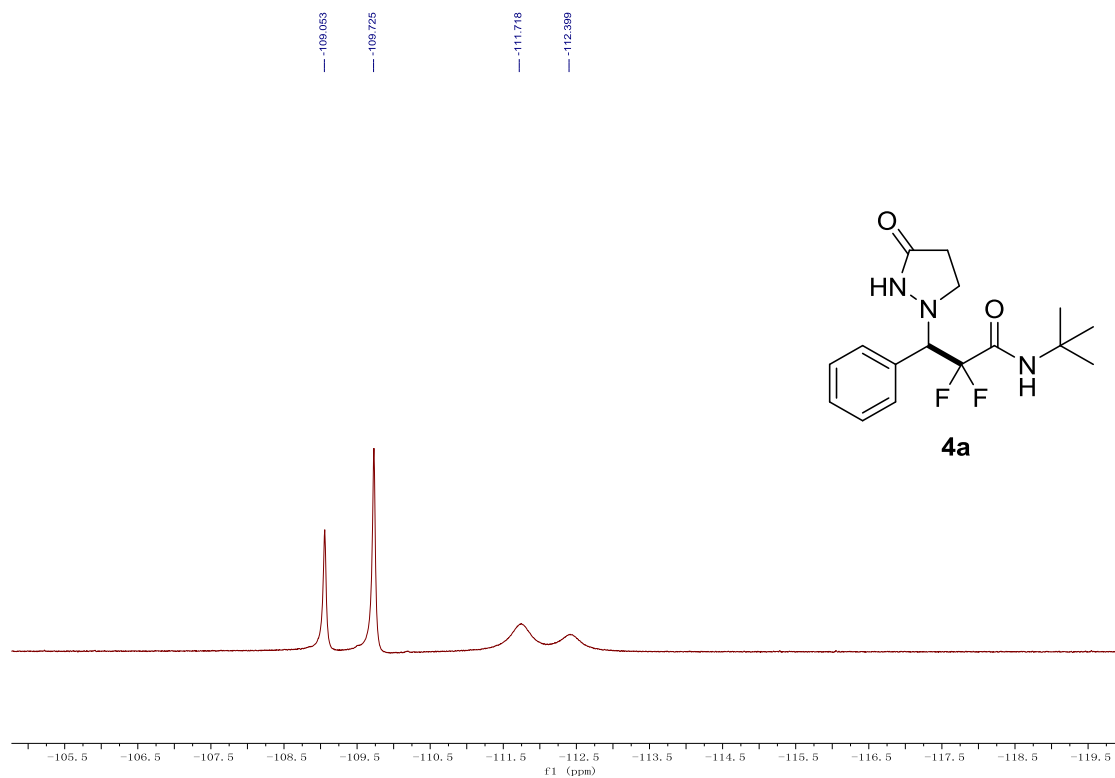

<sup>1</sup>H NMR (400 MHz, CDCl<sub>3</sub>) δ 7.552 (d, 1H), 7.534 (d, 1H), 7.475 (m, 1H), 7.457 (m, 1H), 7.438 (m, 1H), 7.410 (m, 1H), 7.383 (m, 1H), 7.292 (m, 1H), 7.289 (m, 1H), 7.272 (m, 1H), 7.253 (m, 1H), 7.238 (m, 1H), 7.200 (m, 1H), 7.126 (m, 1H), 7.108 (m, 1H), 4.720 (m, 1H), 4.694 (m, 1H), 4.638 (m, 1H), 3.511 (s, 2H), 3.454 (s, 2H), 3.434 (s, 2H), 3.425 (s, 2H), 3.410 (s, 2H), 3.402 (s, 2H), 3.385 (s, 2H), 1.711 (s, 3H), 1.687 (s, 3H), 1.677 (s, 3H), 1.670 (s, 3H), 1.657 (s, 3H), 1.650 (s, 3H), 1.421 (s, 3H), 1.398 (s, 3H), 1.375 (s, 3H), 1.357 (s, 3H), 1.334 (s, 3H).

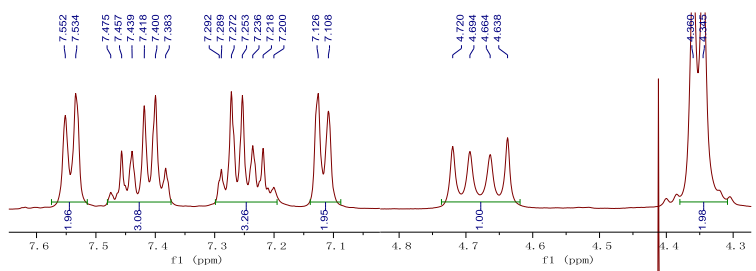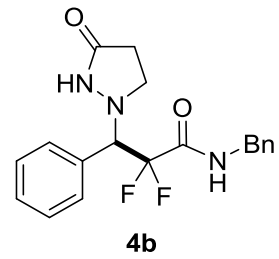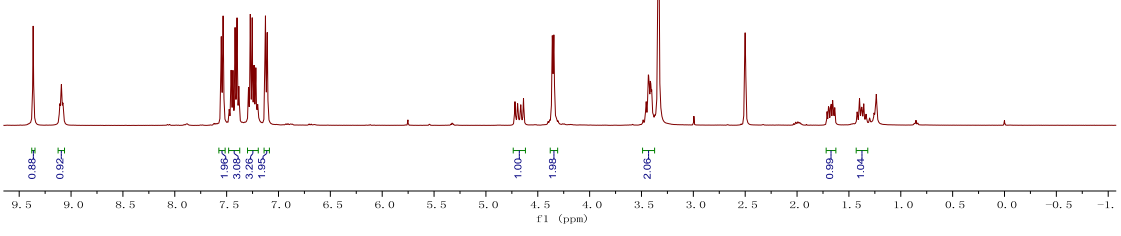

178.613, 164.002, 163.730, 163.455, 136.949, 130.801, 130.265, 128.548, 128.548, 128.577, 127.595, 127.548, 119.525, 116.988, 116.927, 114.392, 71.219, 71.021, 70.948, 70.751, 51.766, 43.472, 29.852.

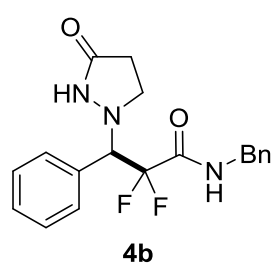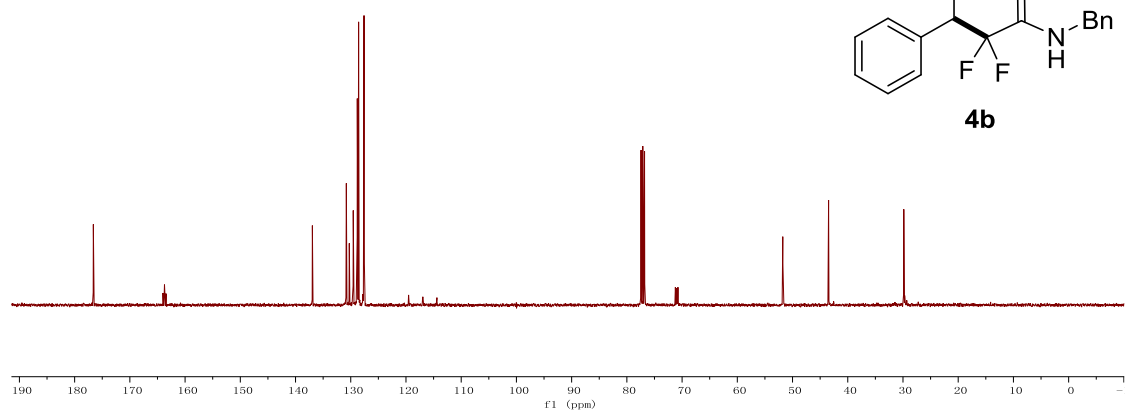

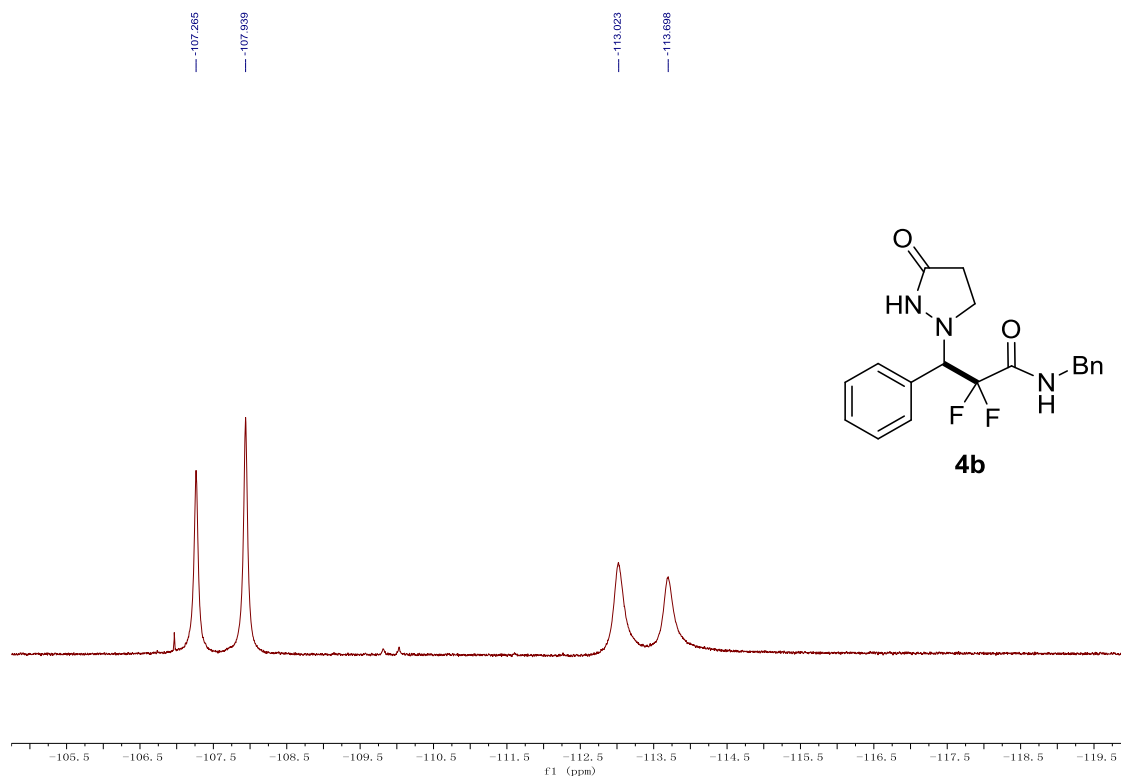

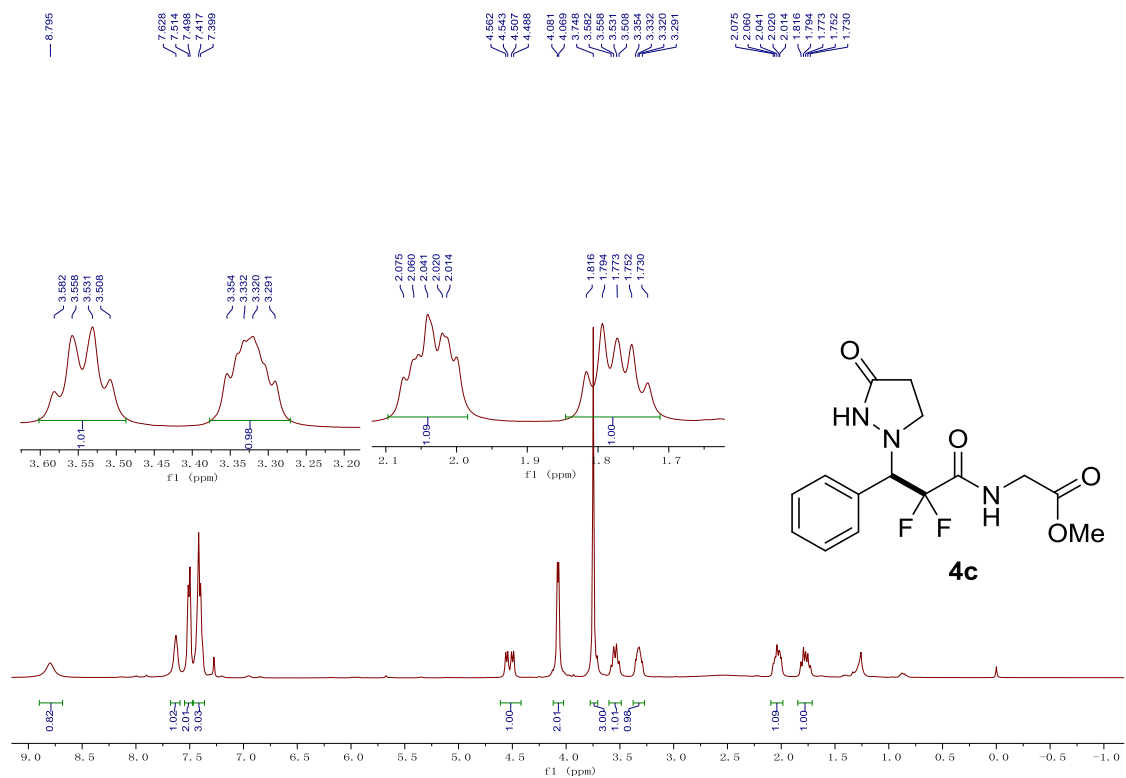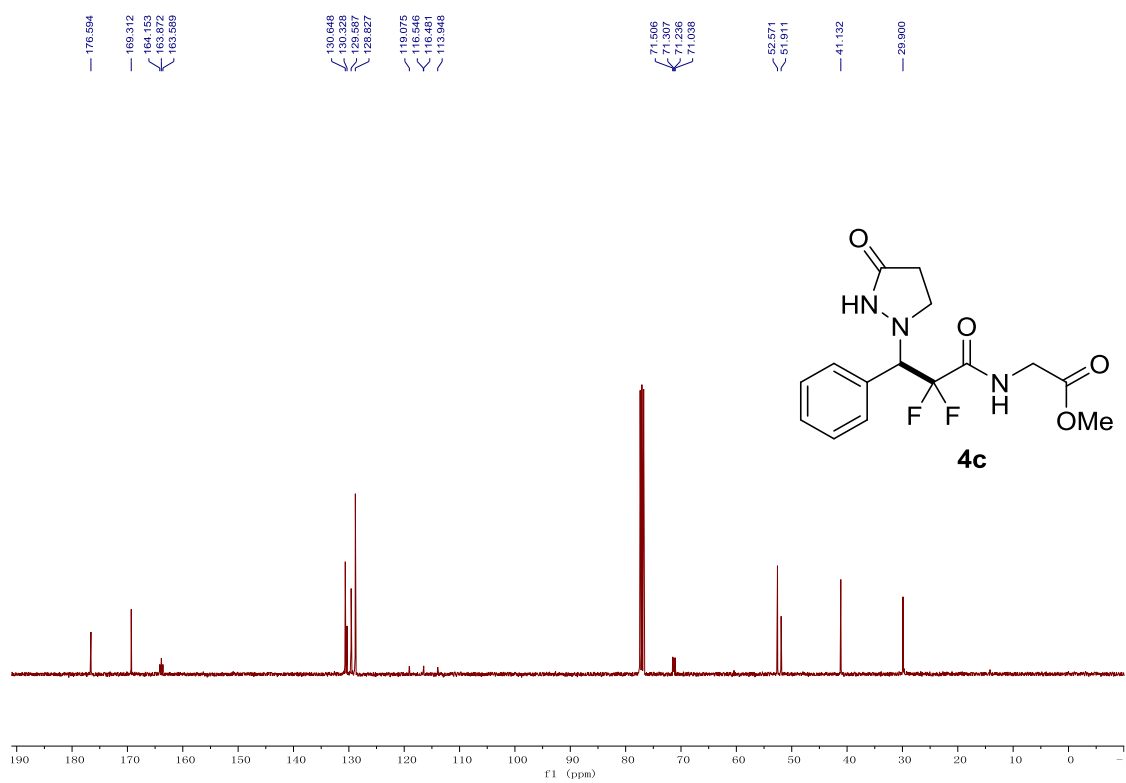

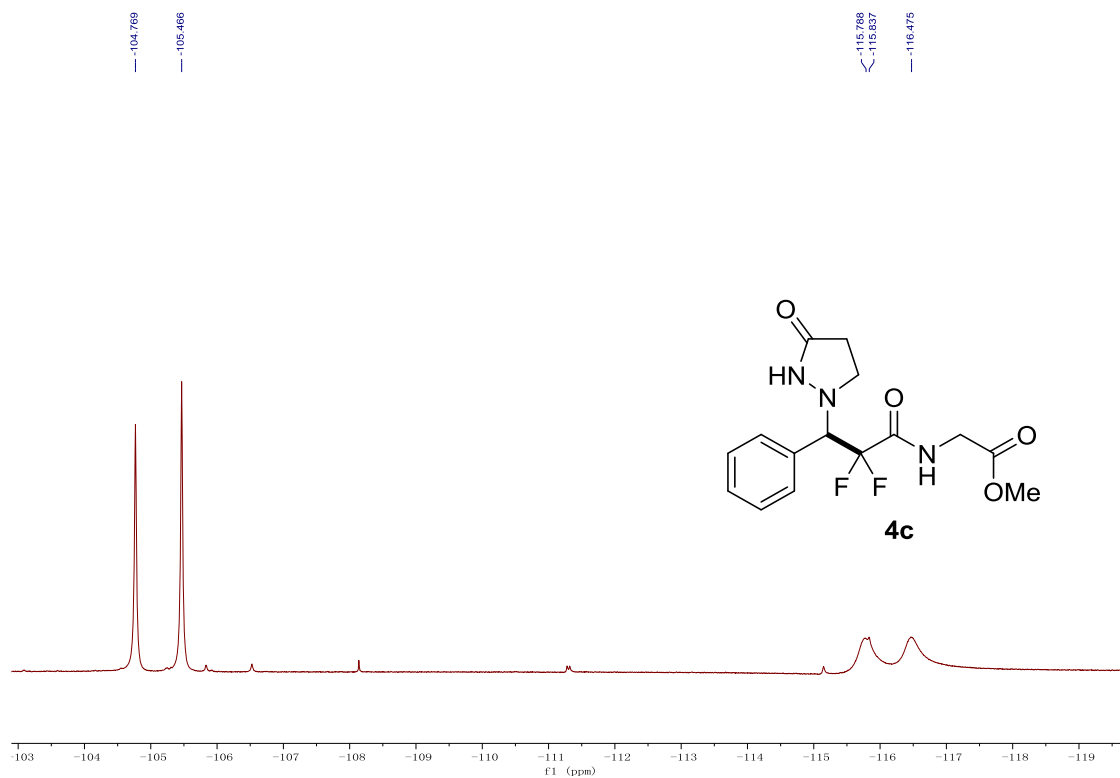

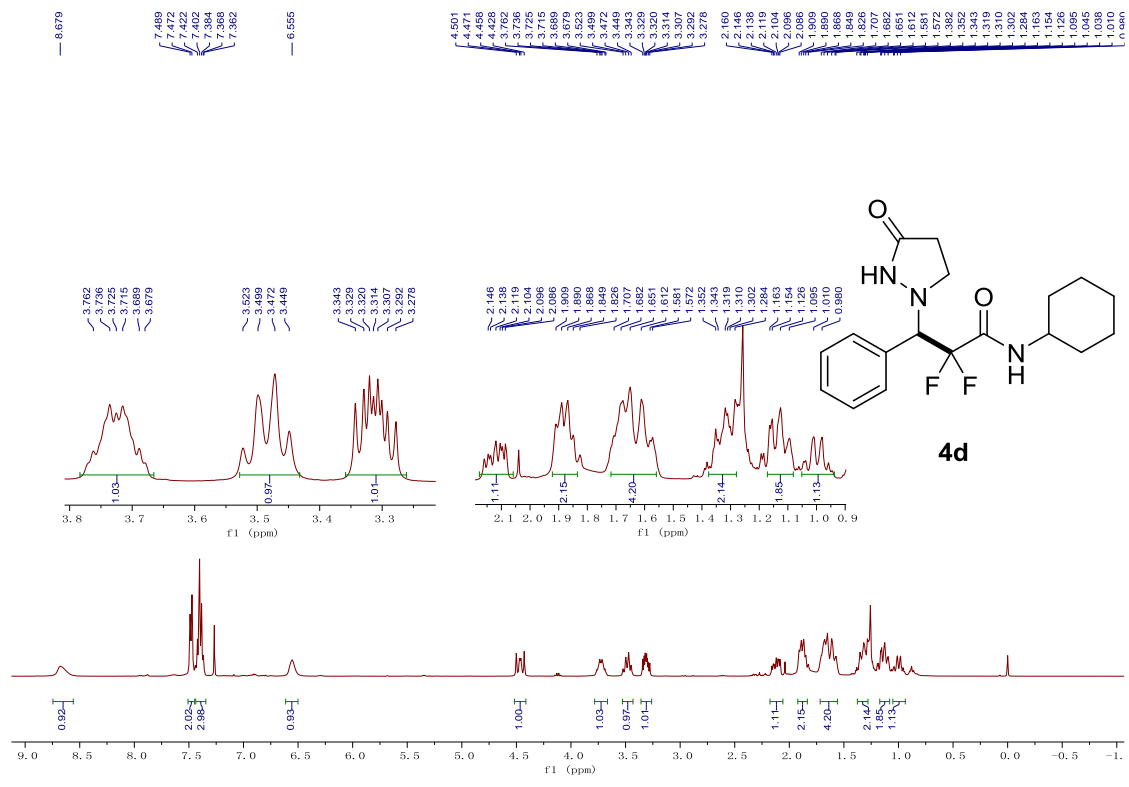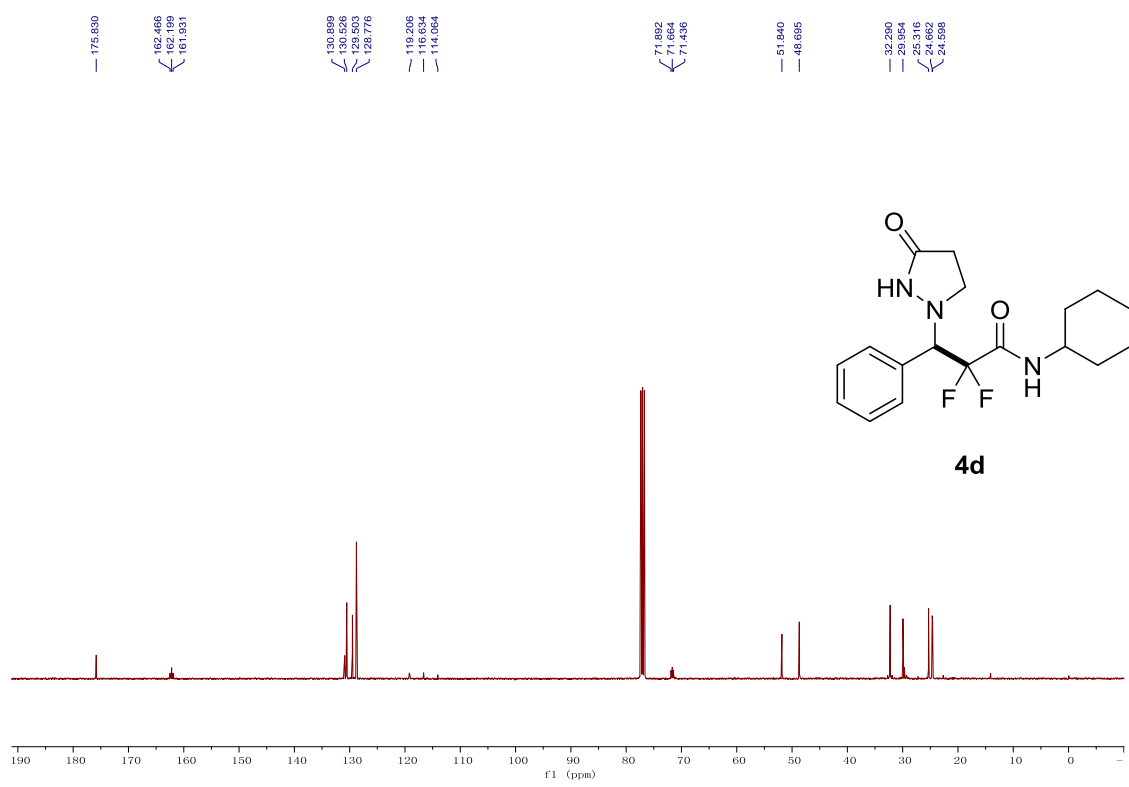

-108.186  
-108.257  
-108.855

-112.948  
-113.639

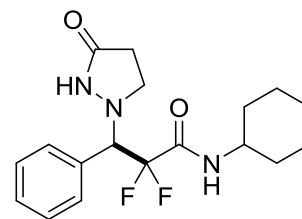

4d

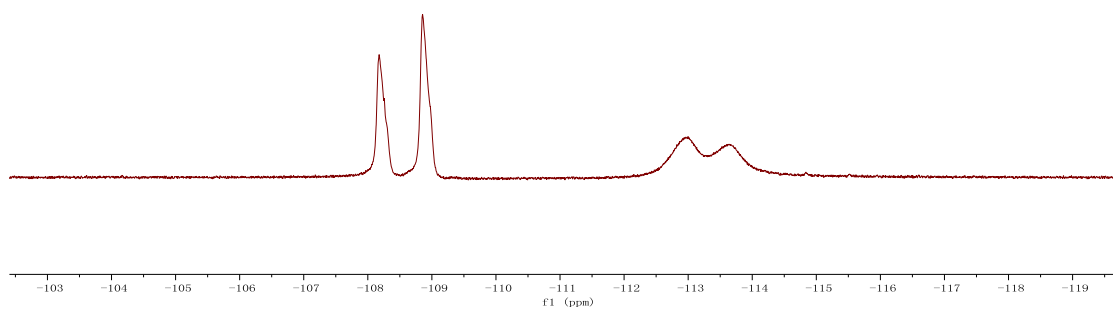

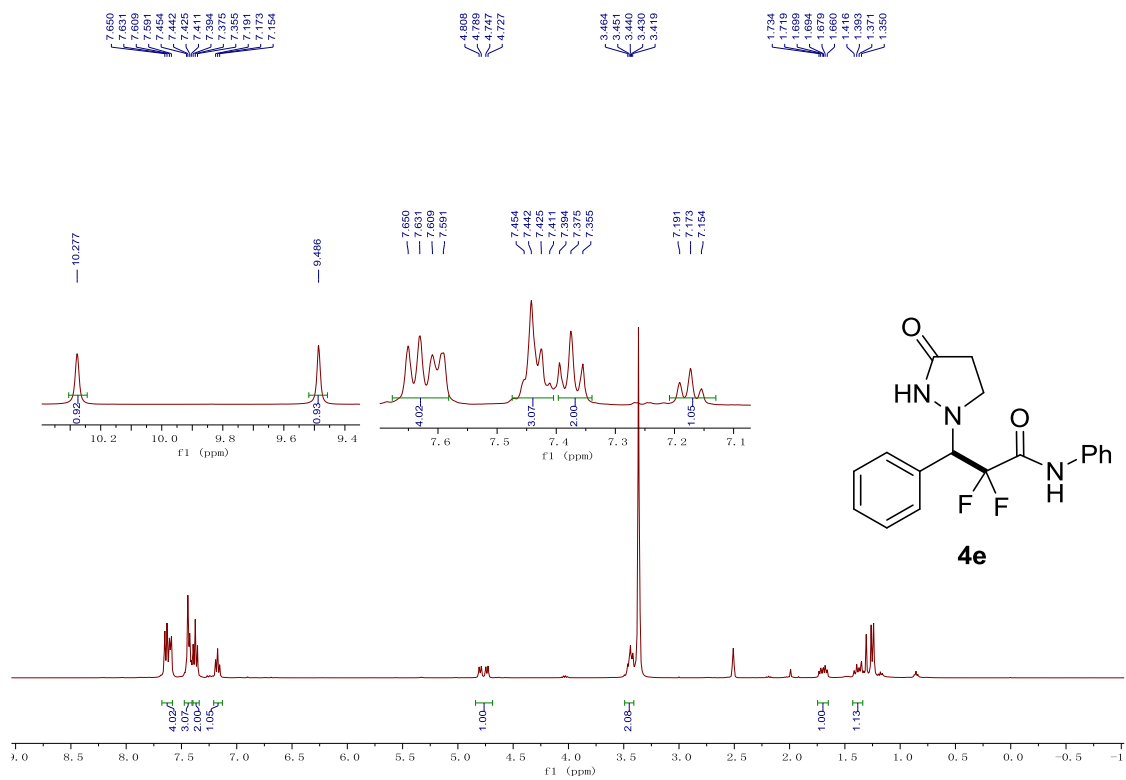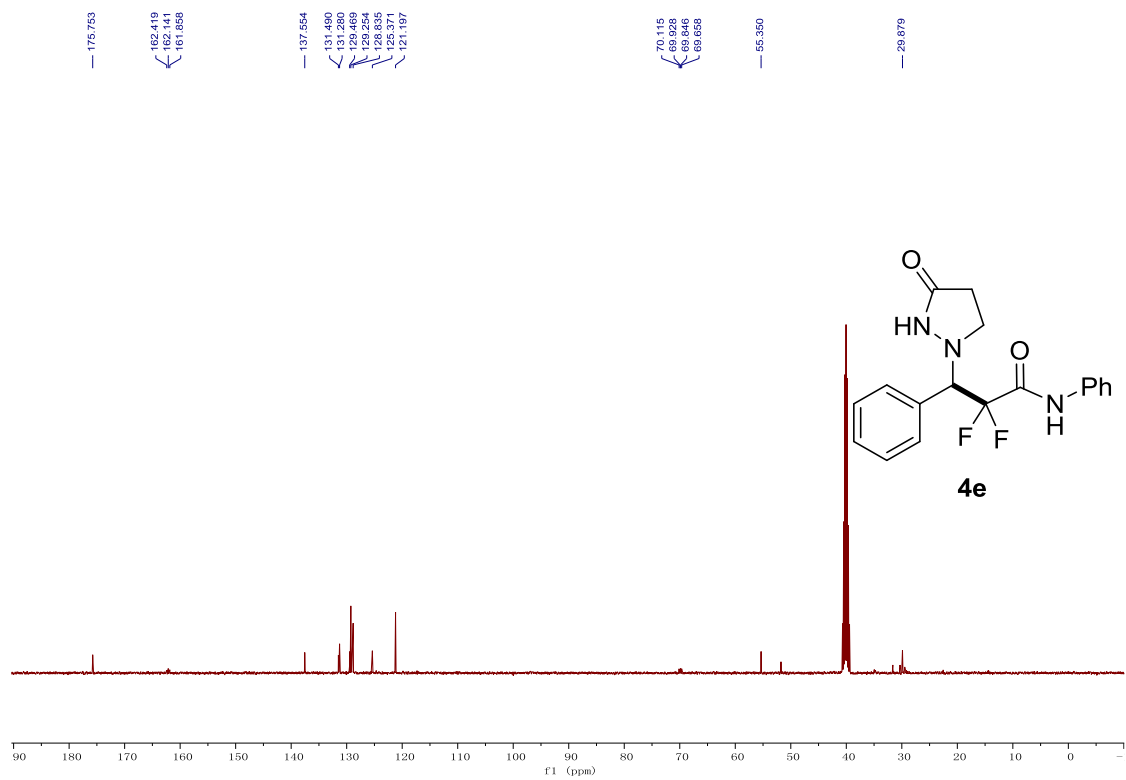



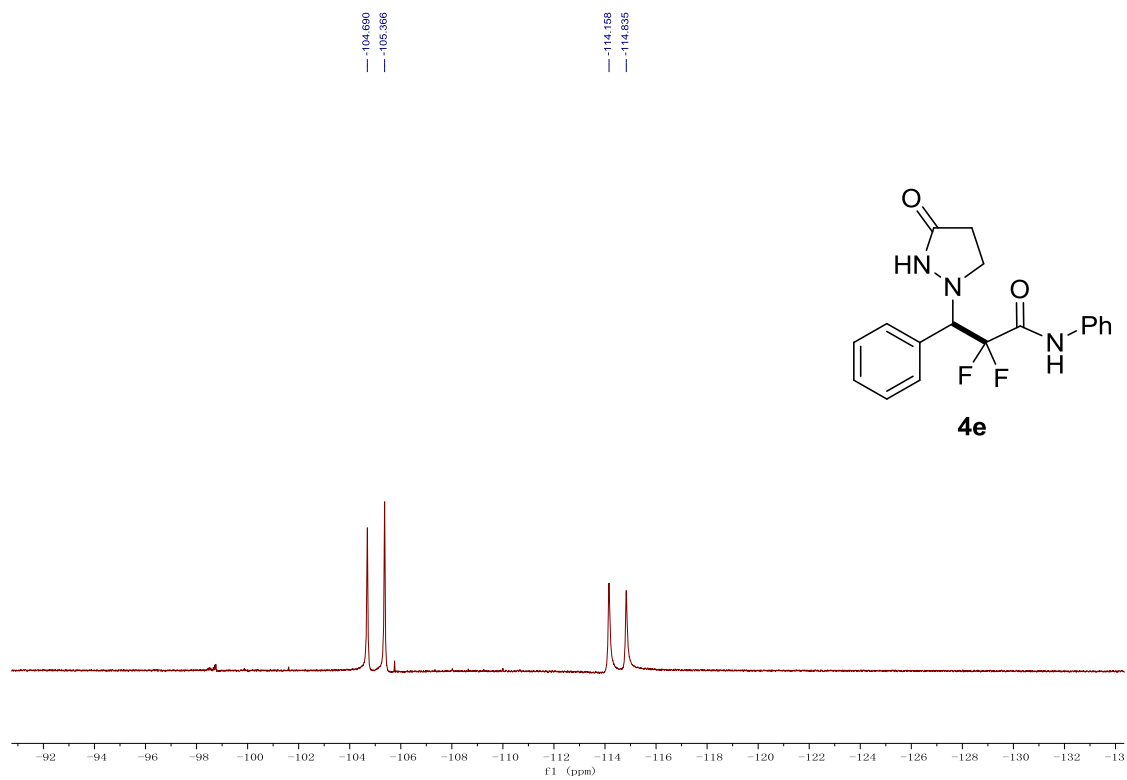



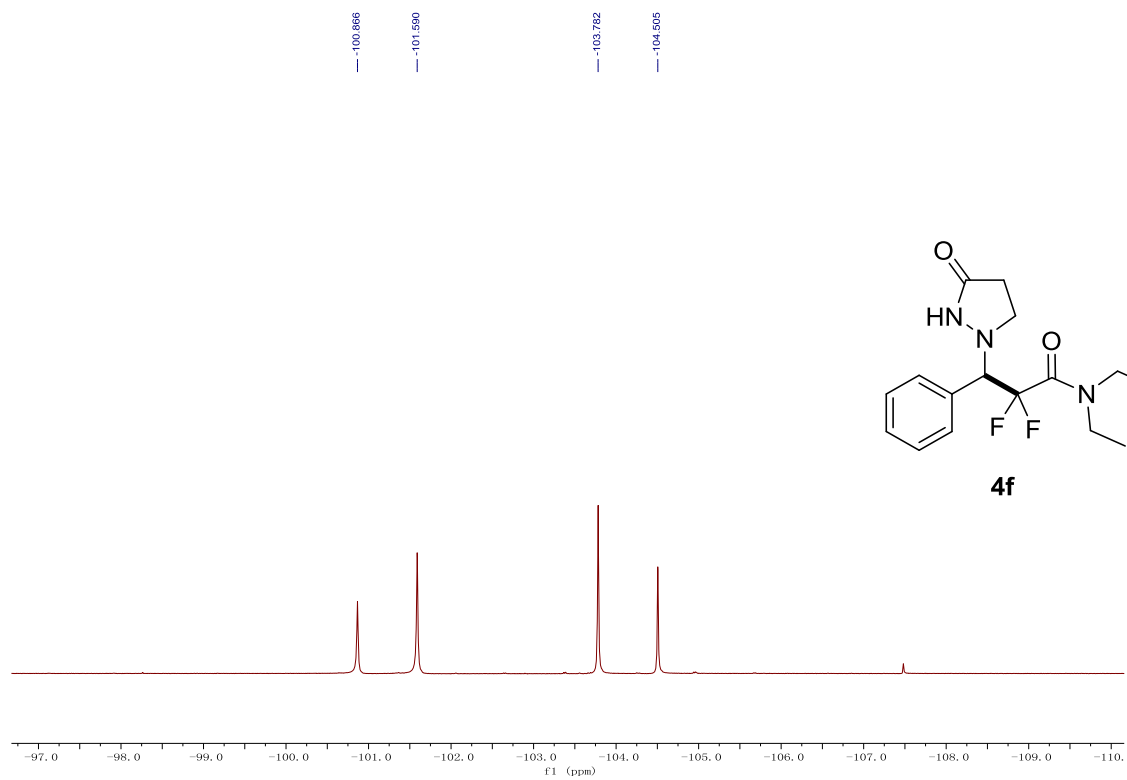

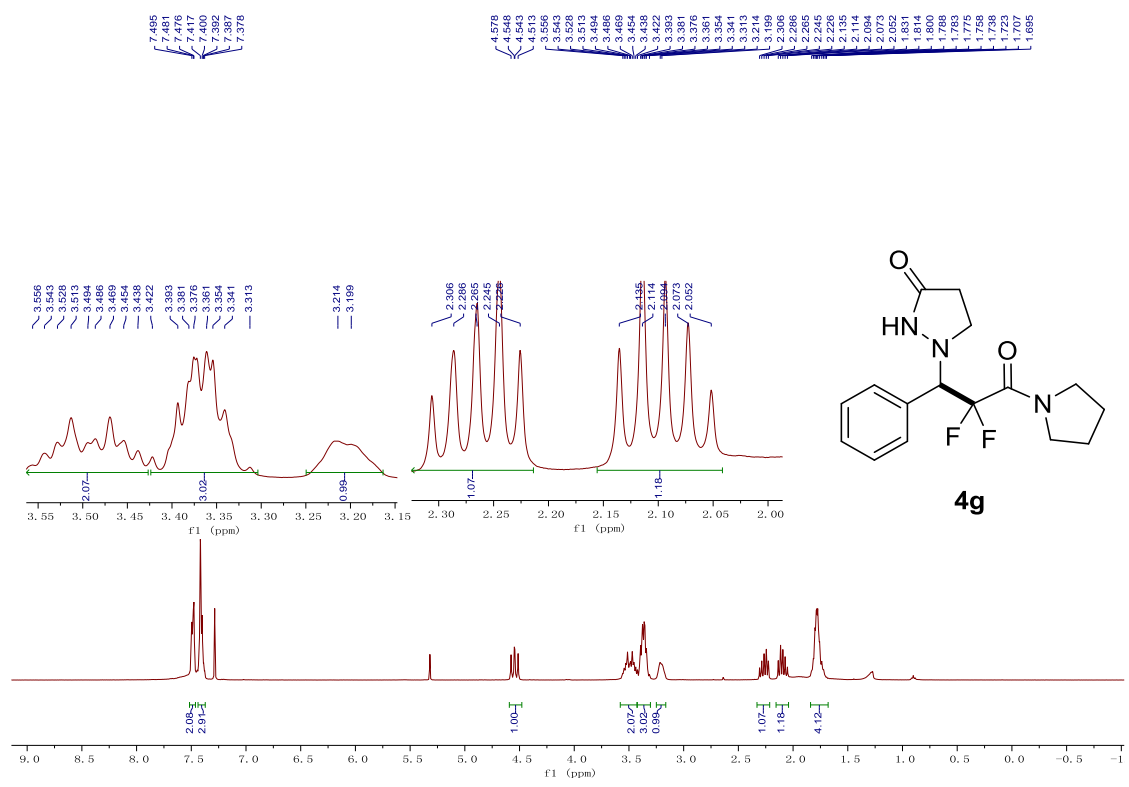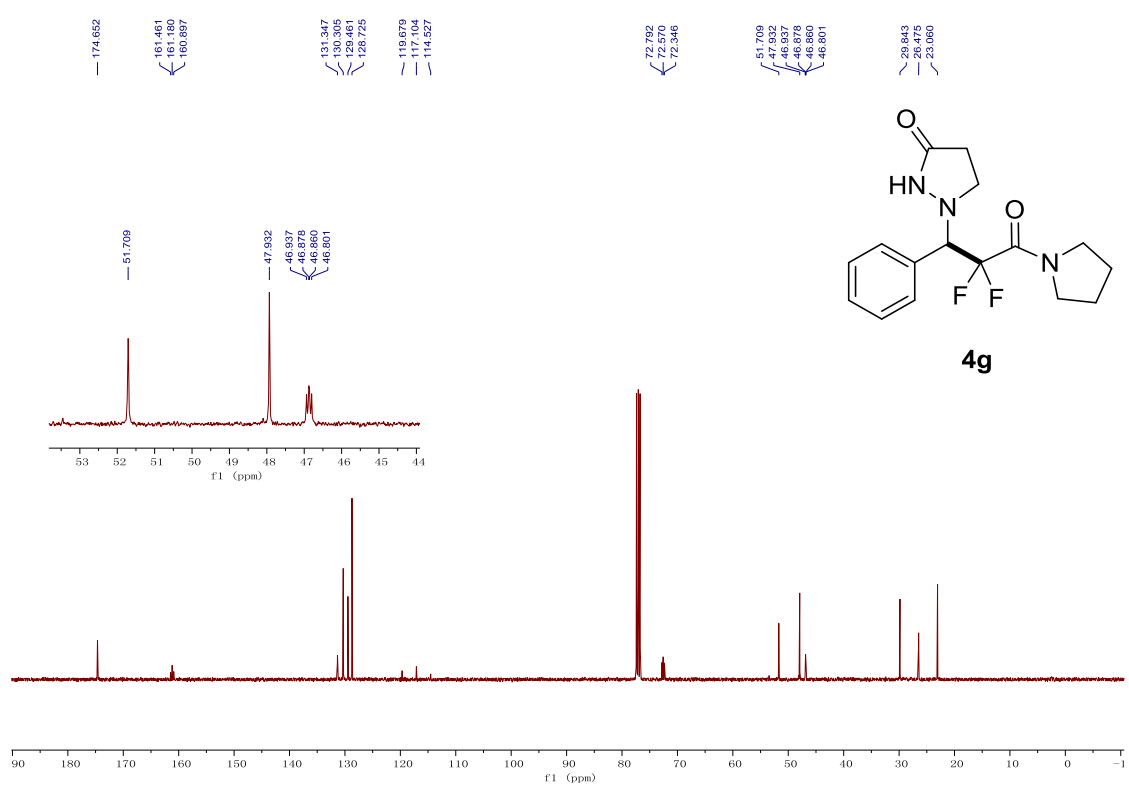

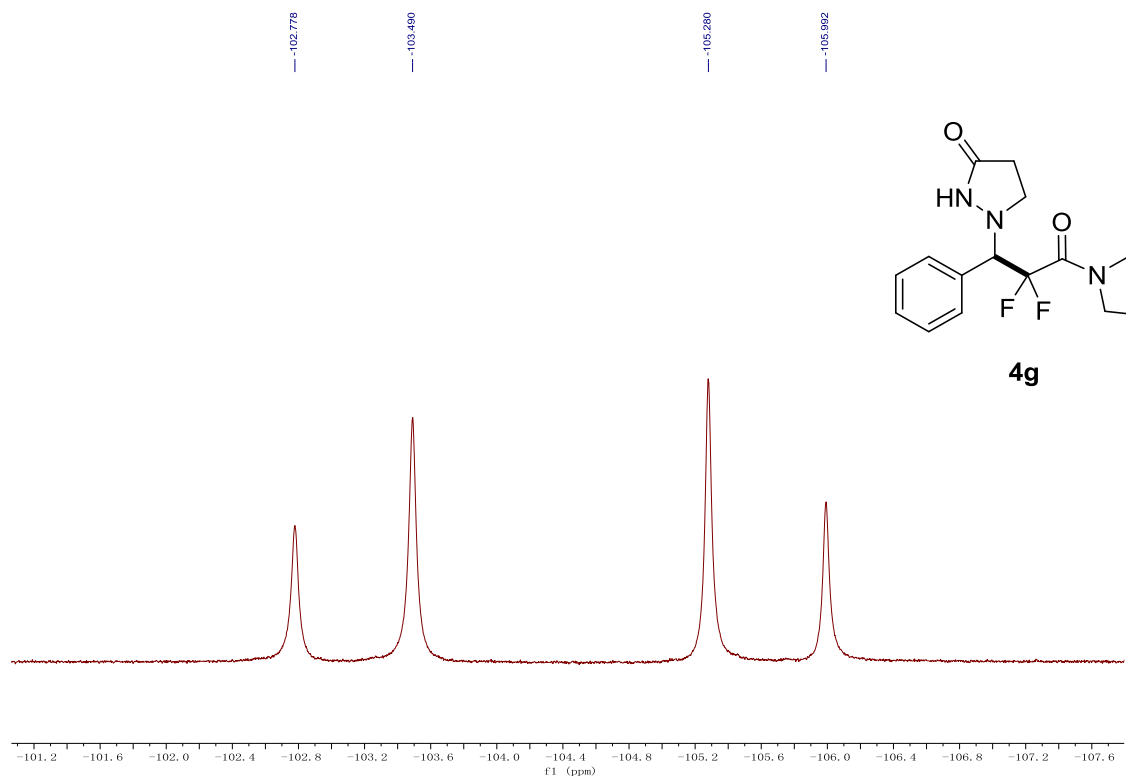

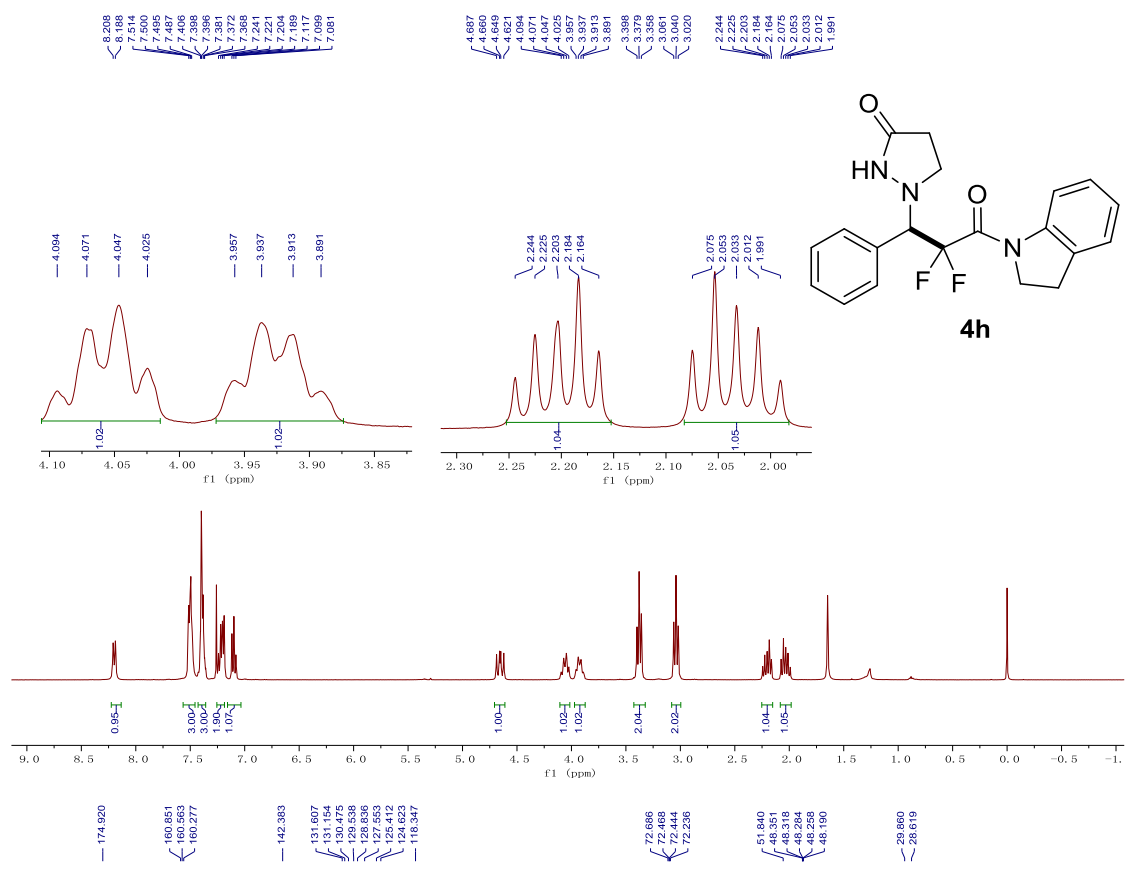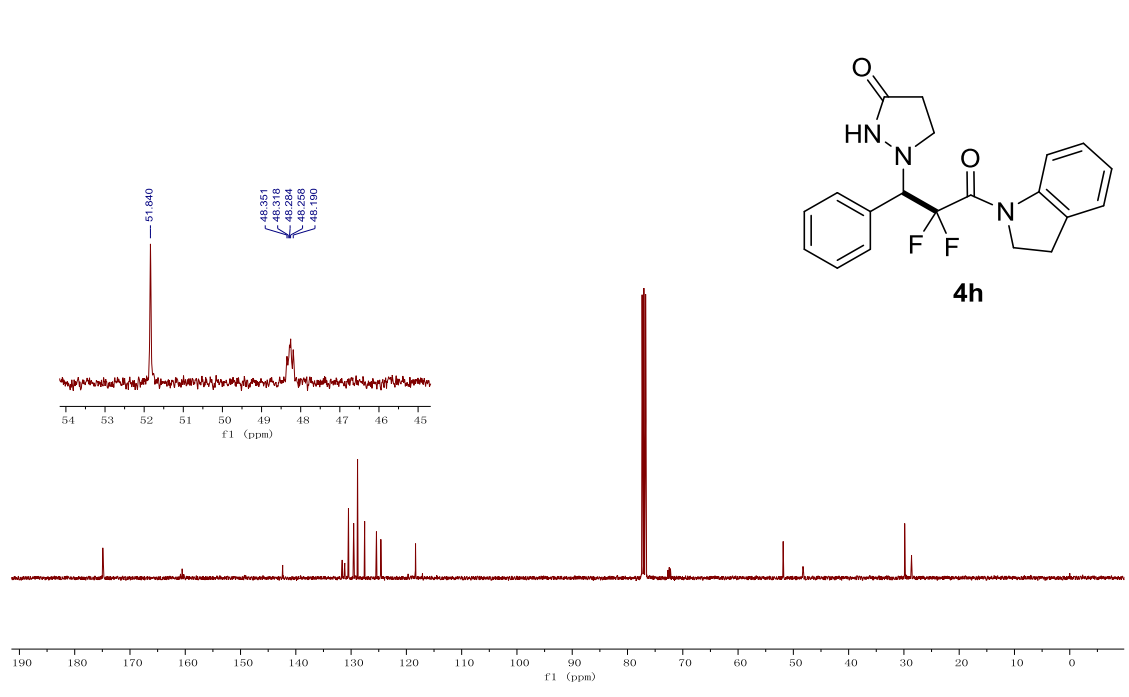

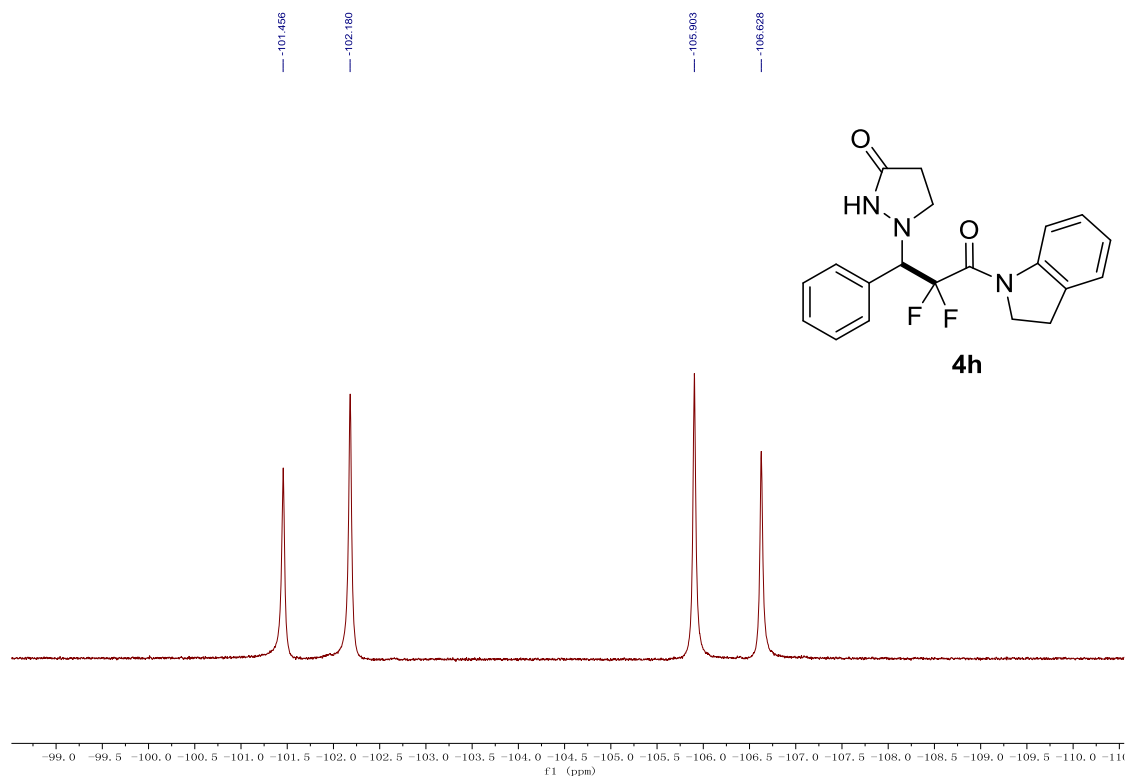

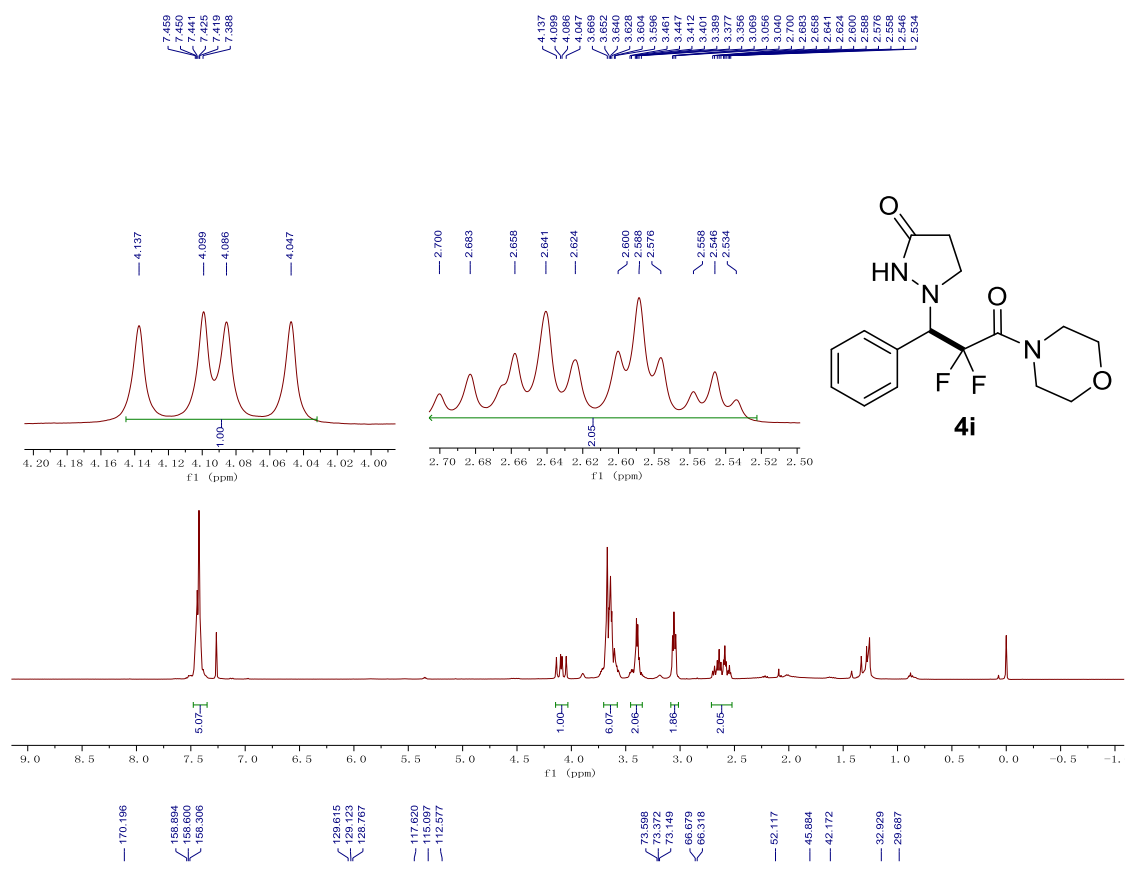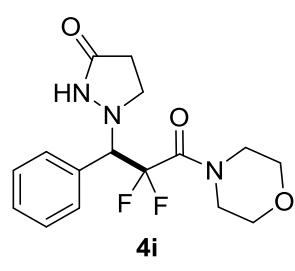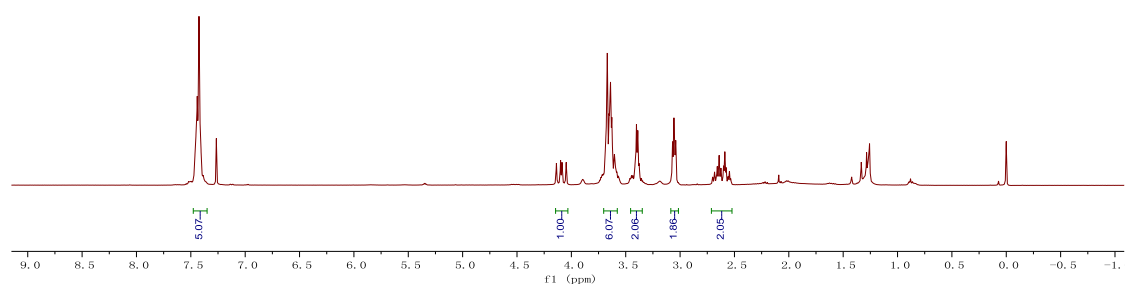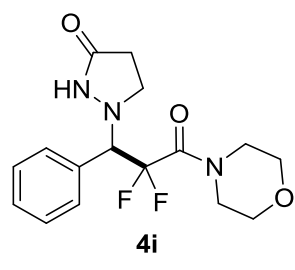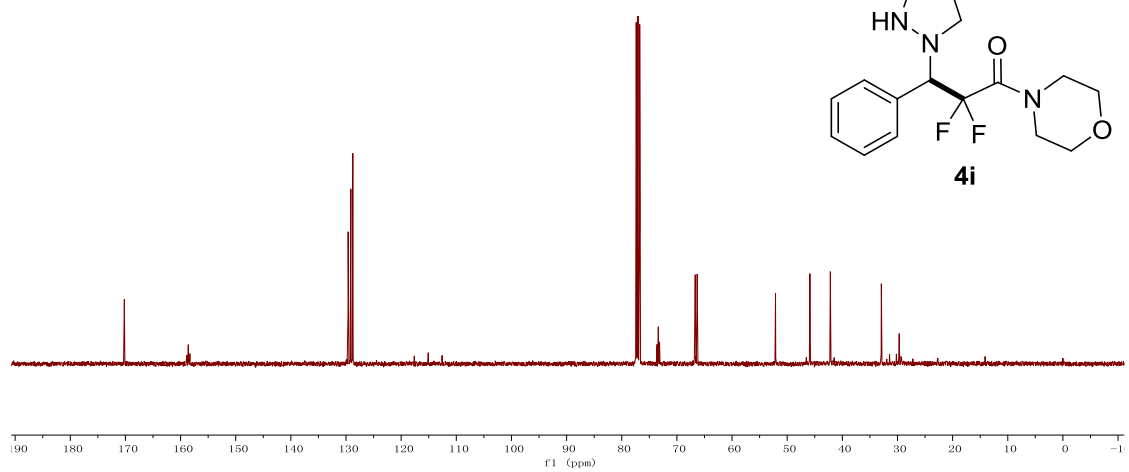



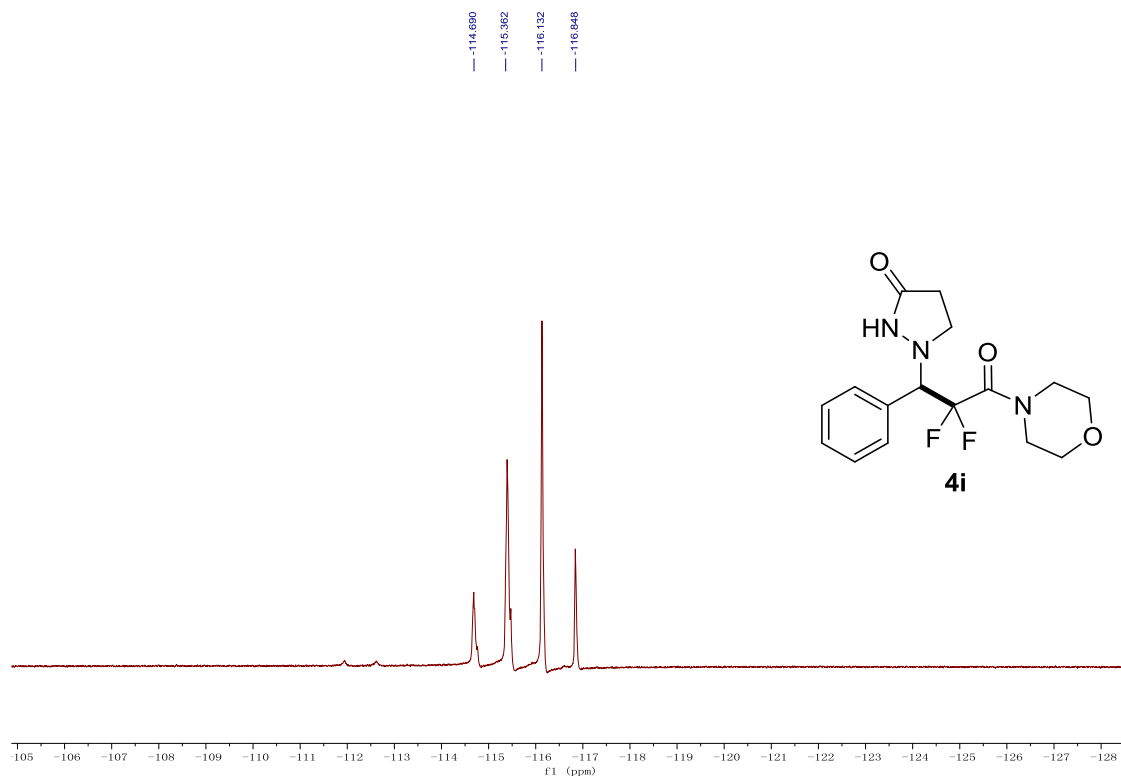

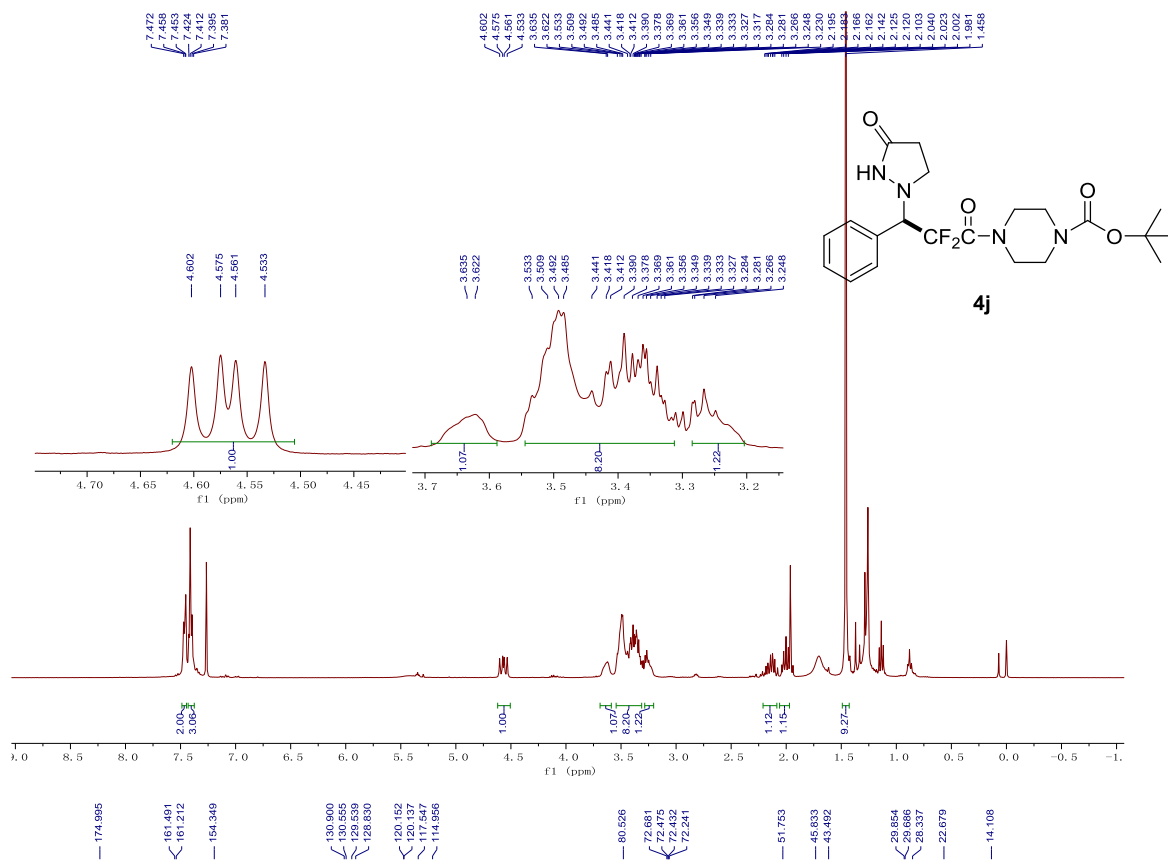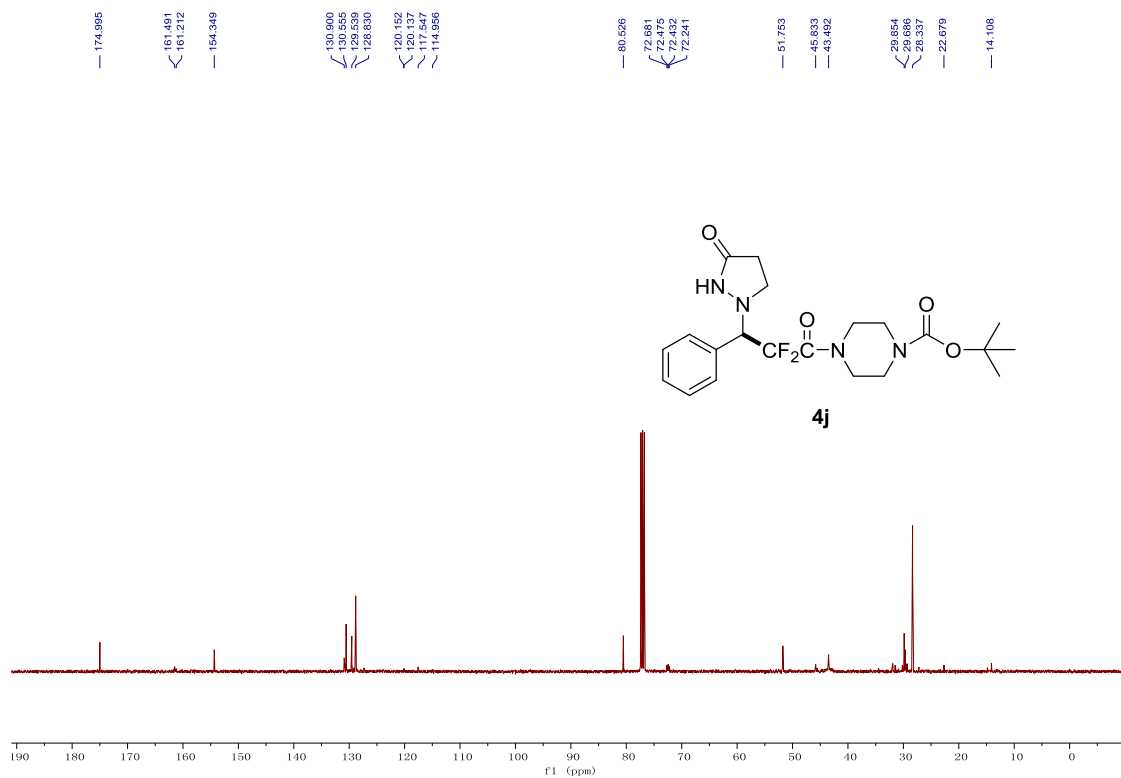

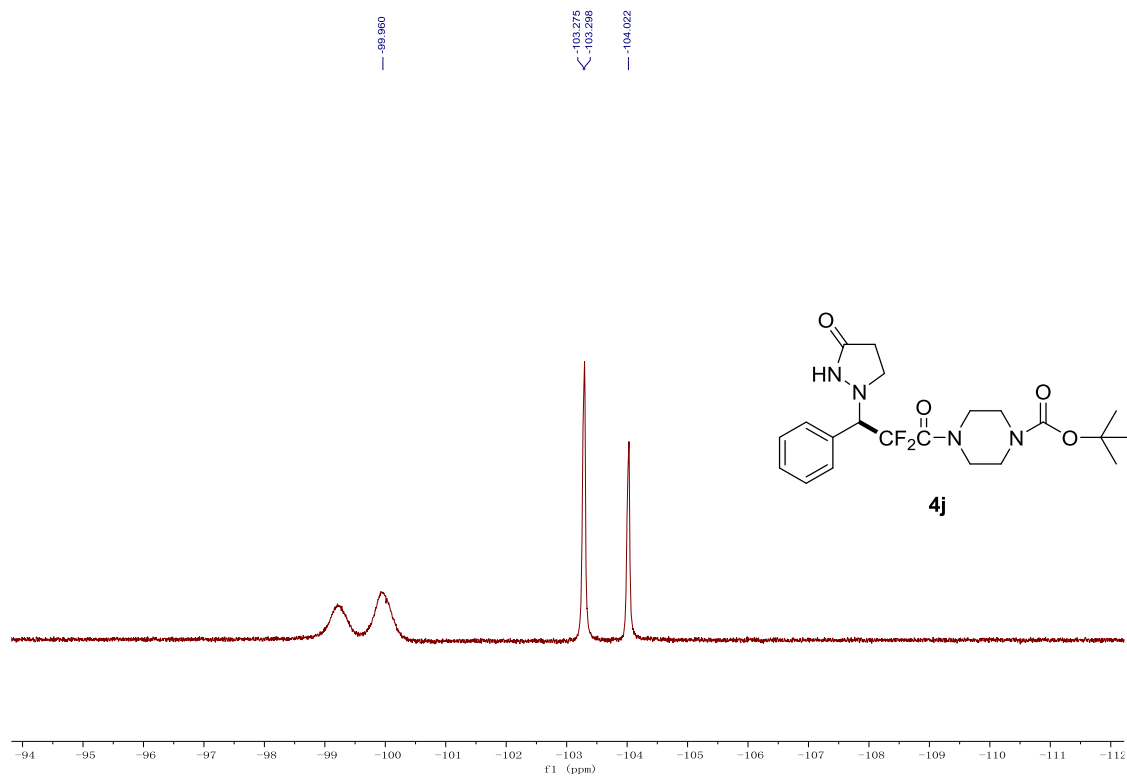

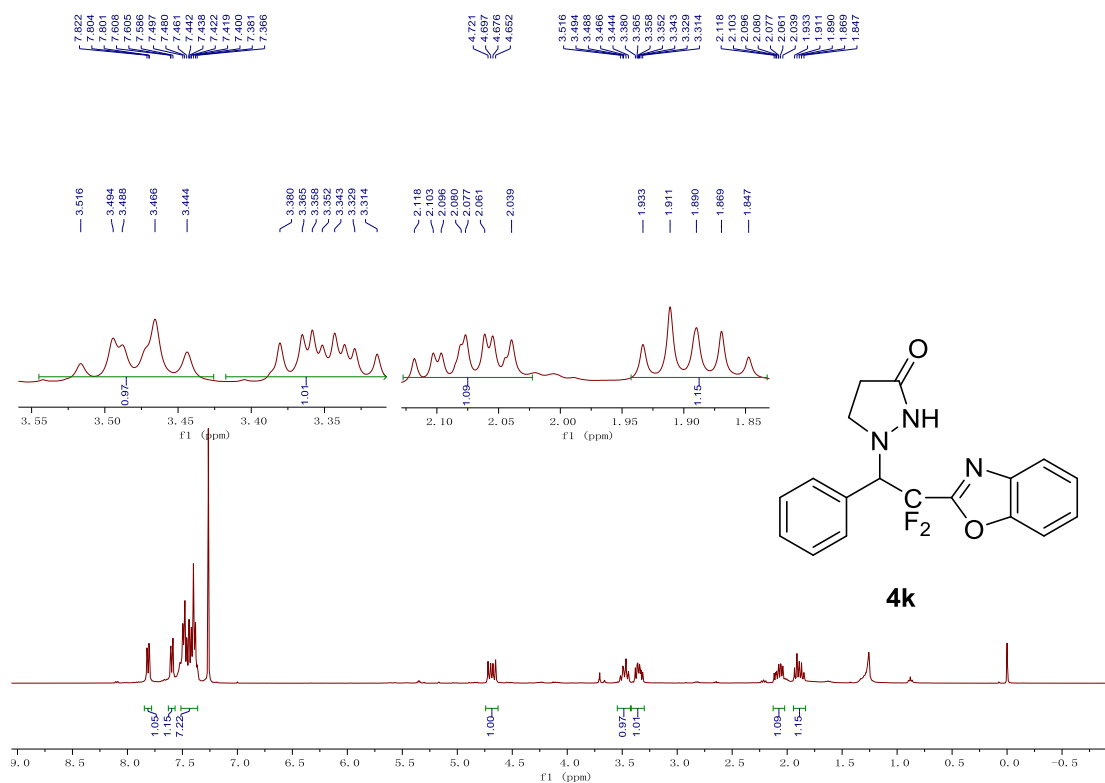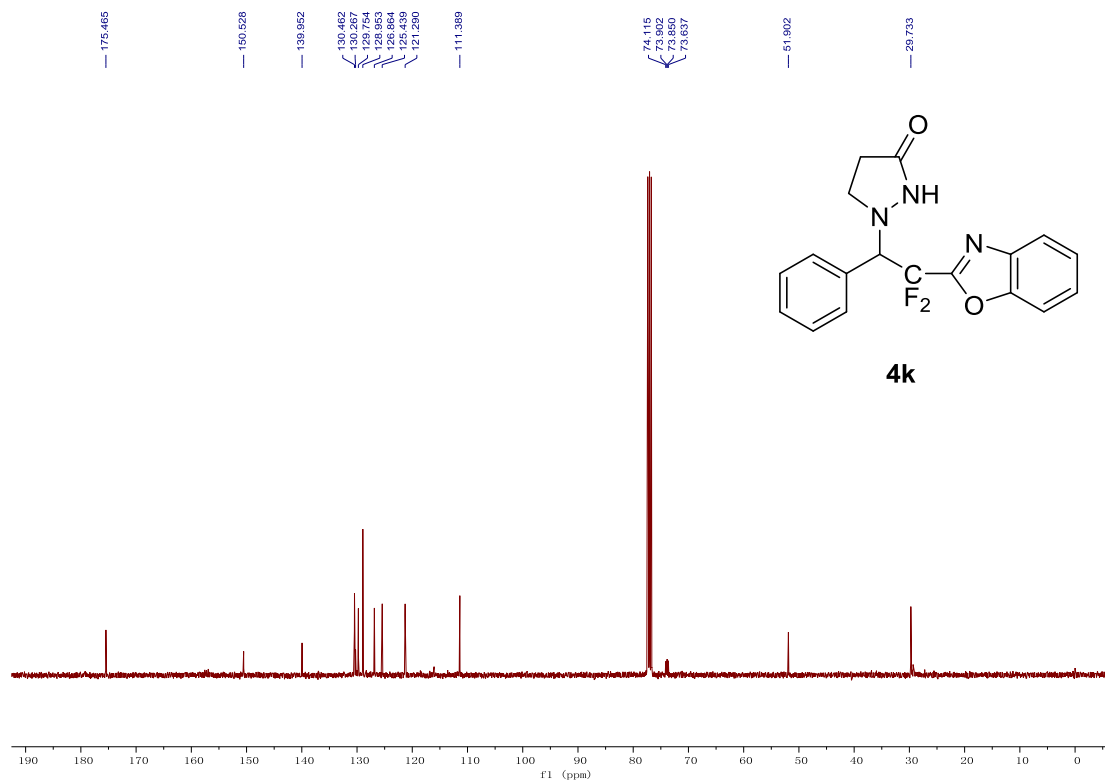

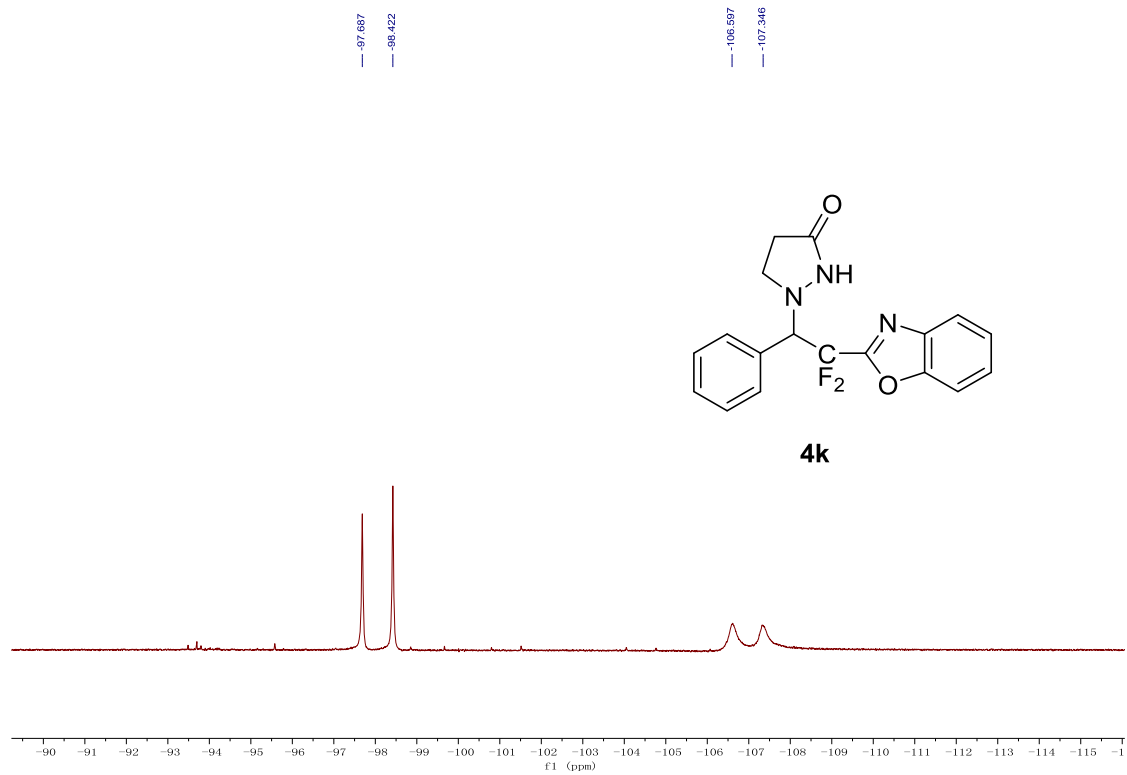

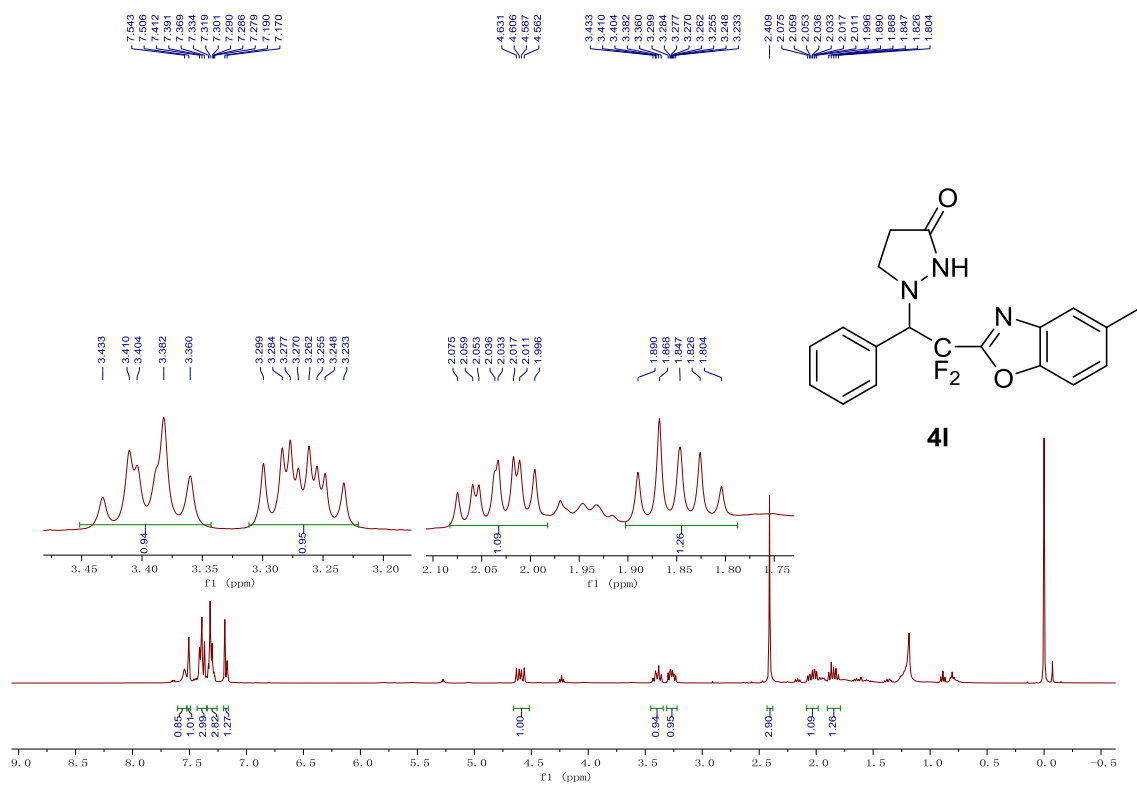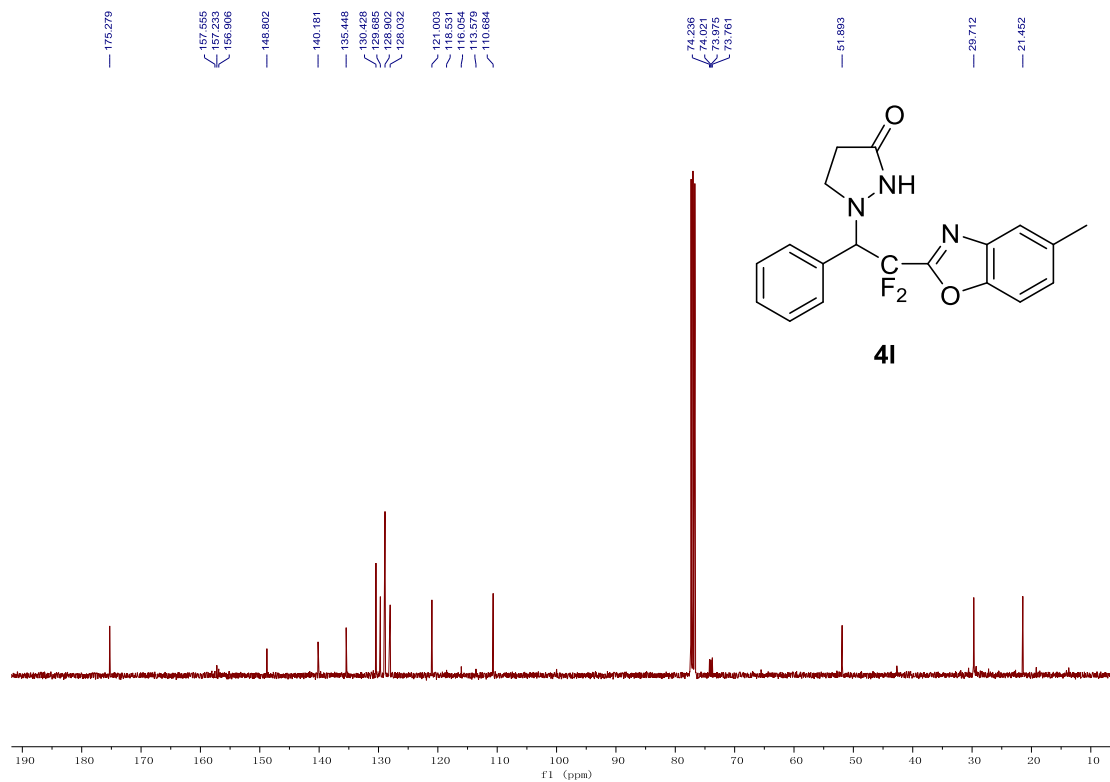

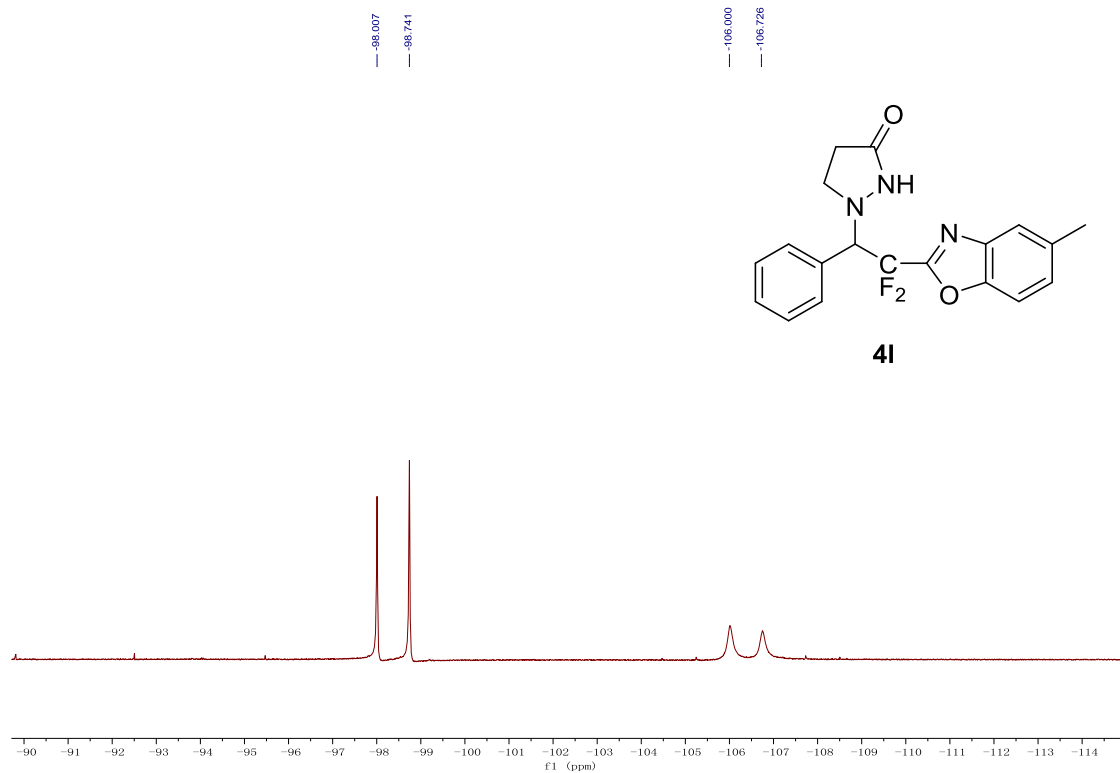

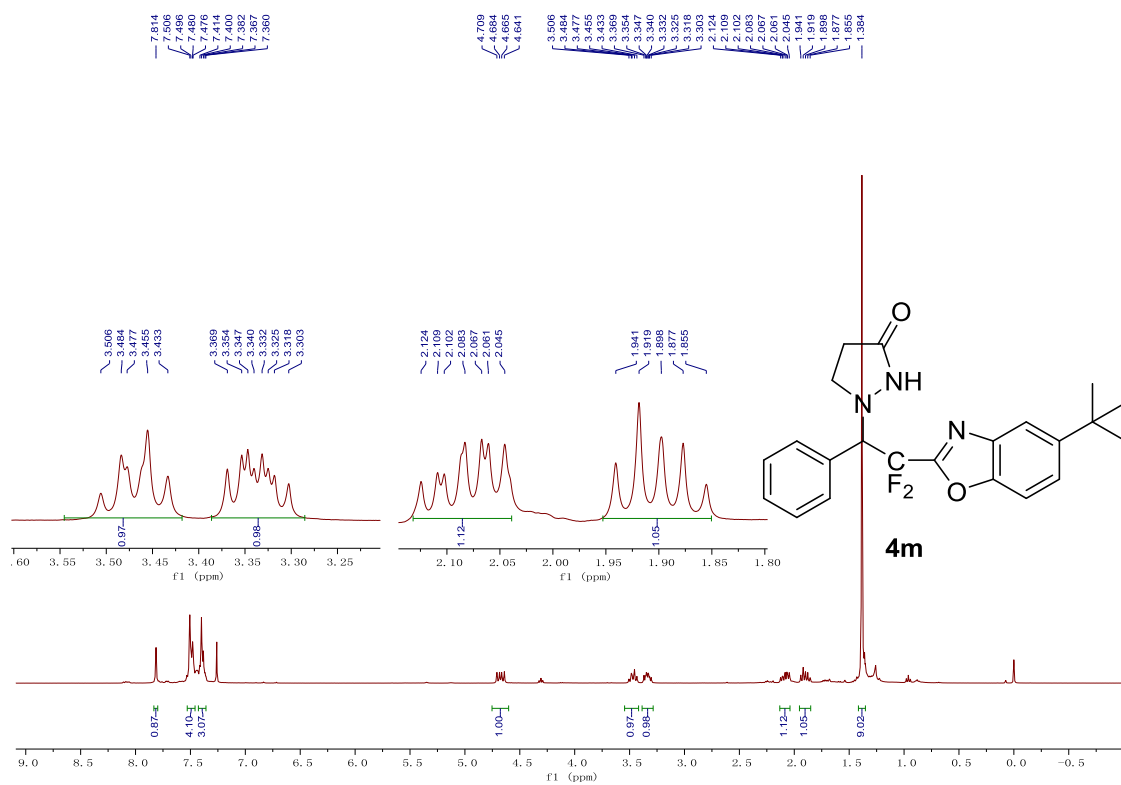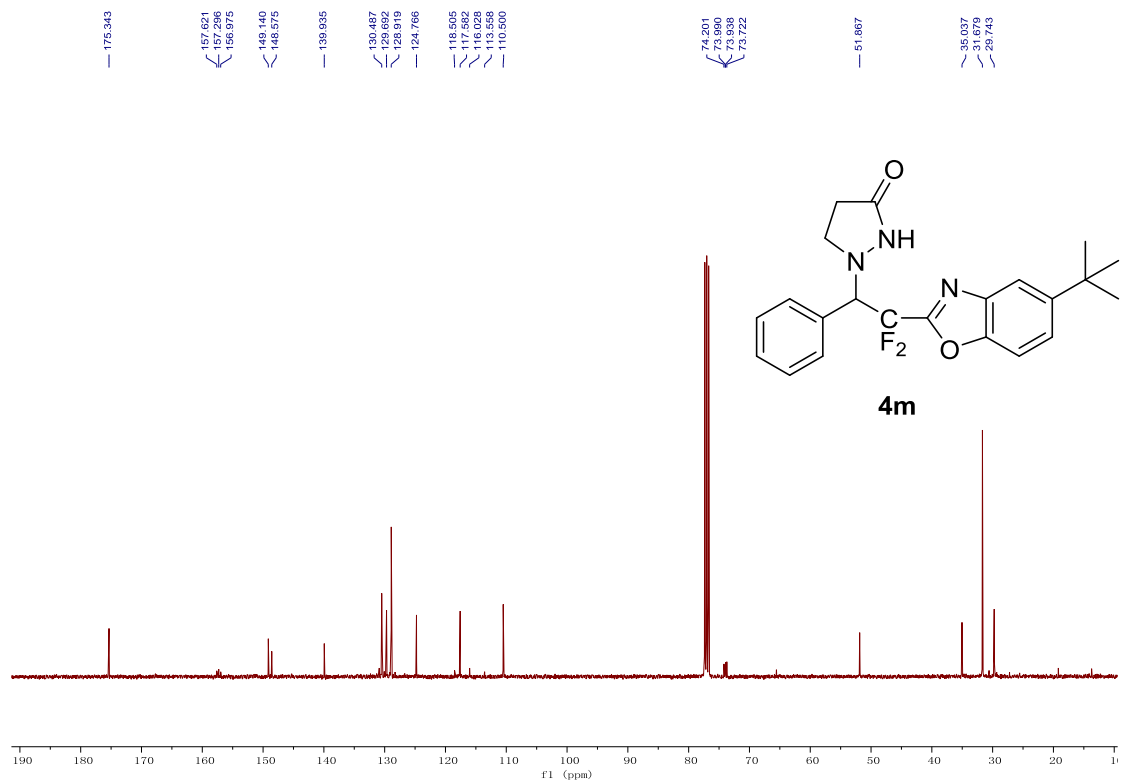



---98.885  
---97.721

---108.240  
---108.873

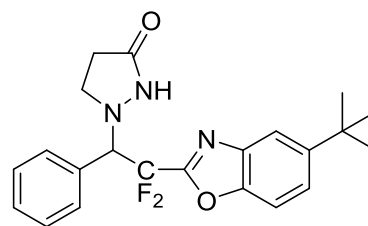

**4m**

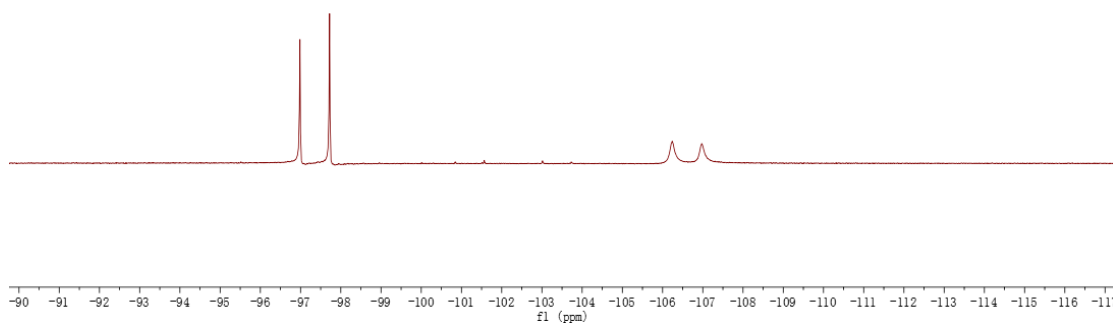

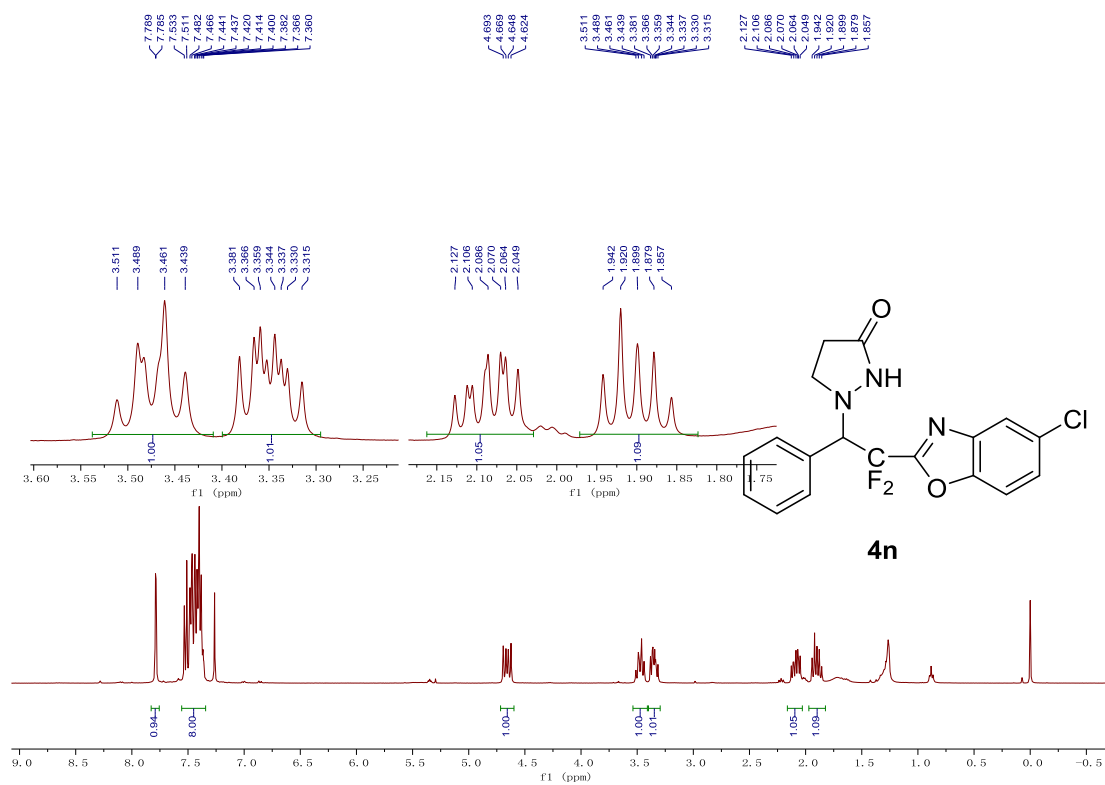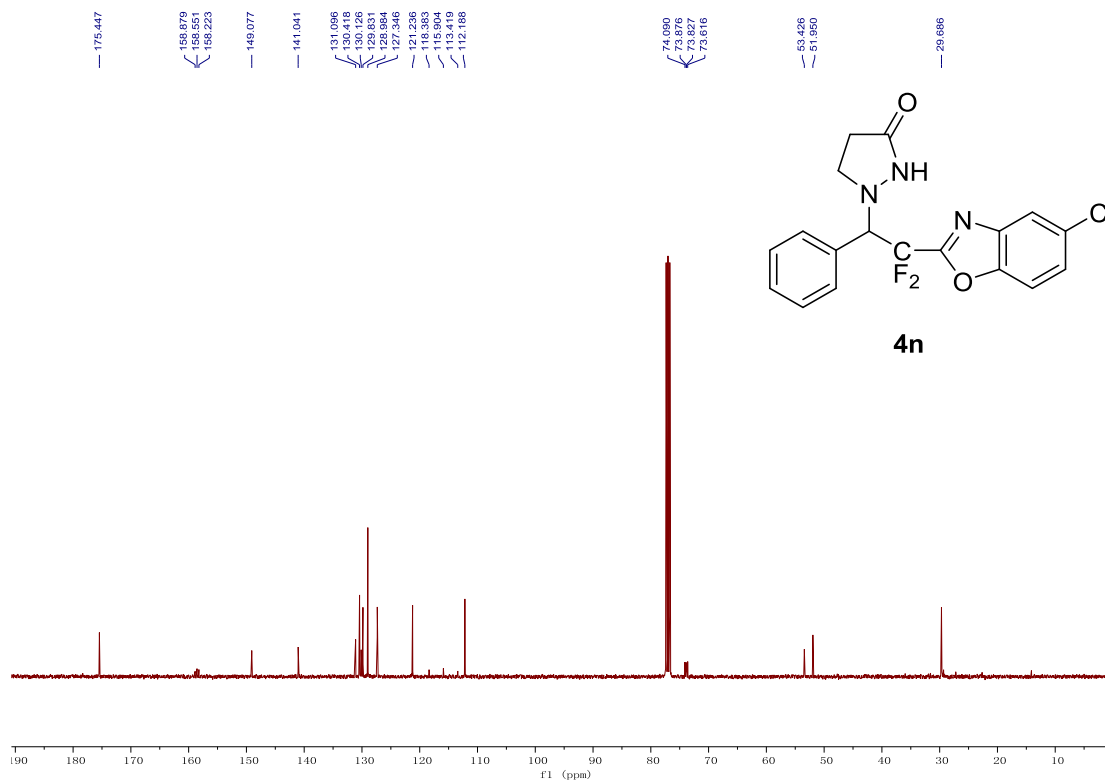

—88.269  
—89.036

—106.884  
—107.447

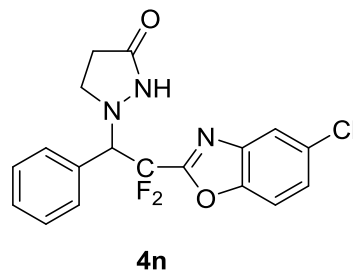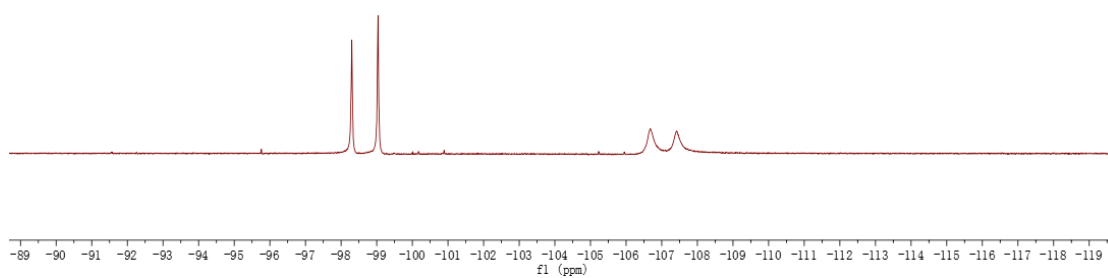

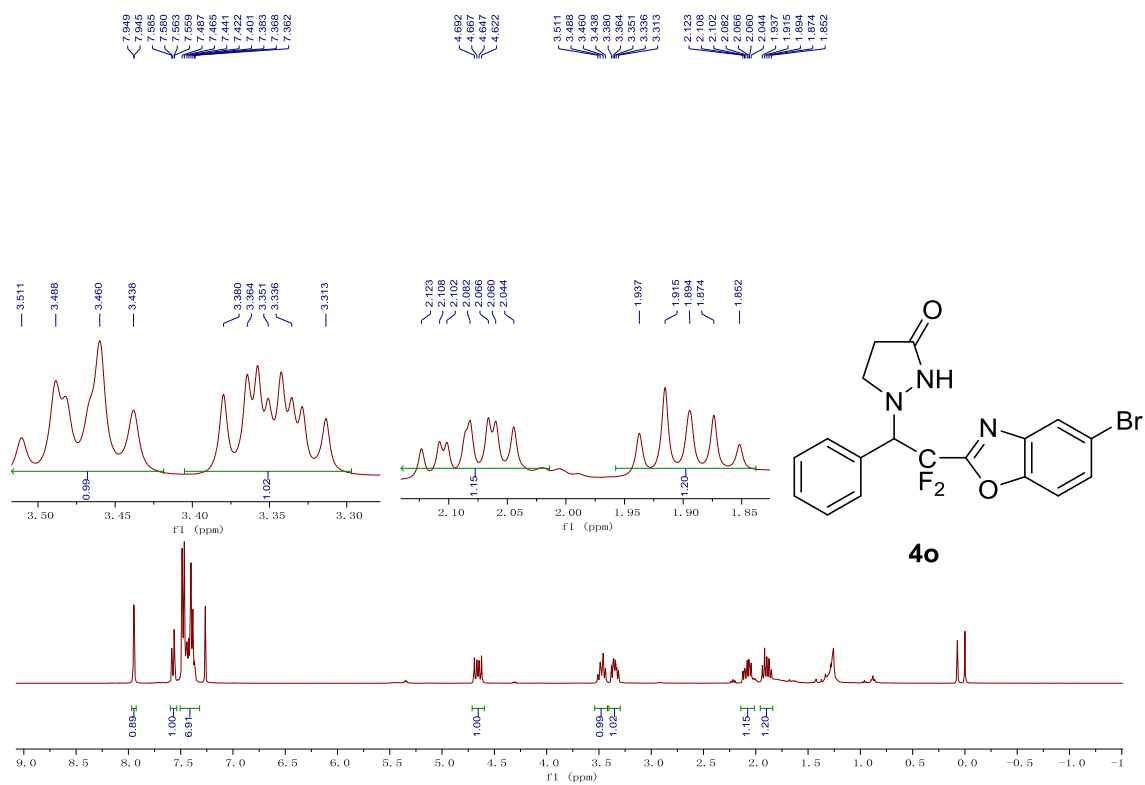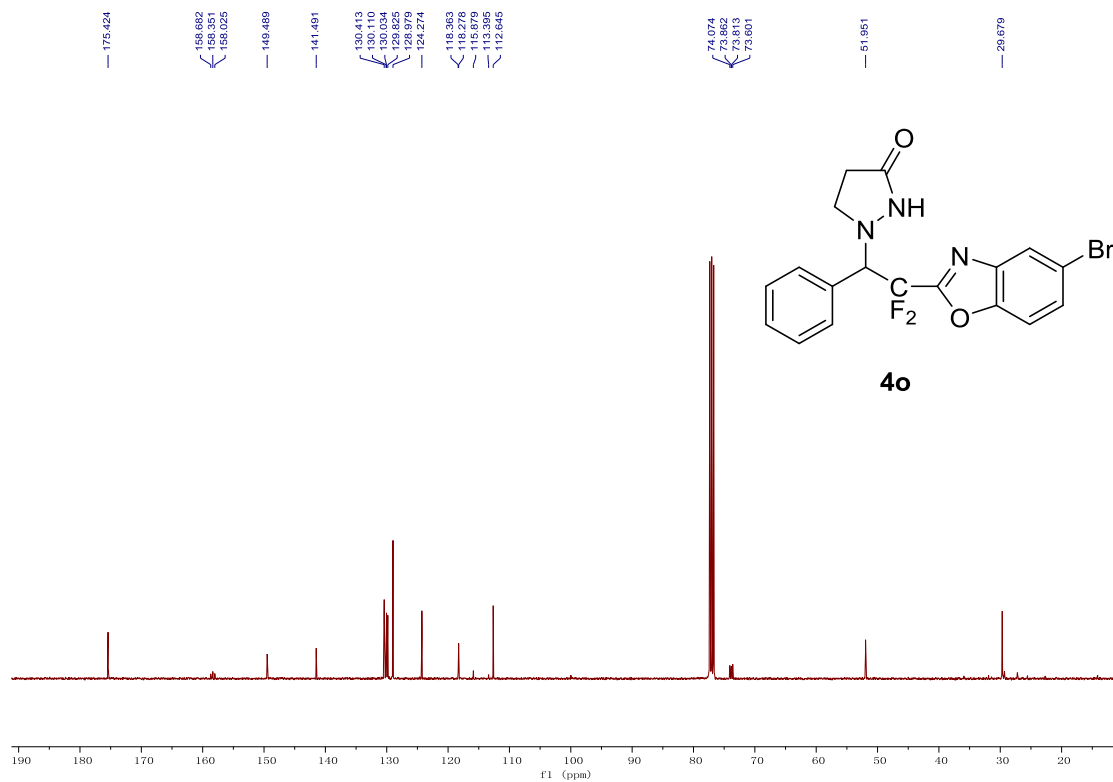

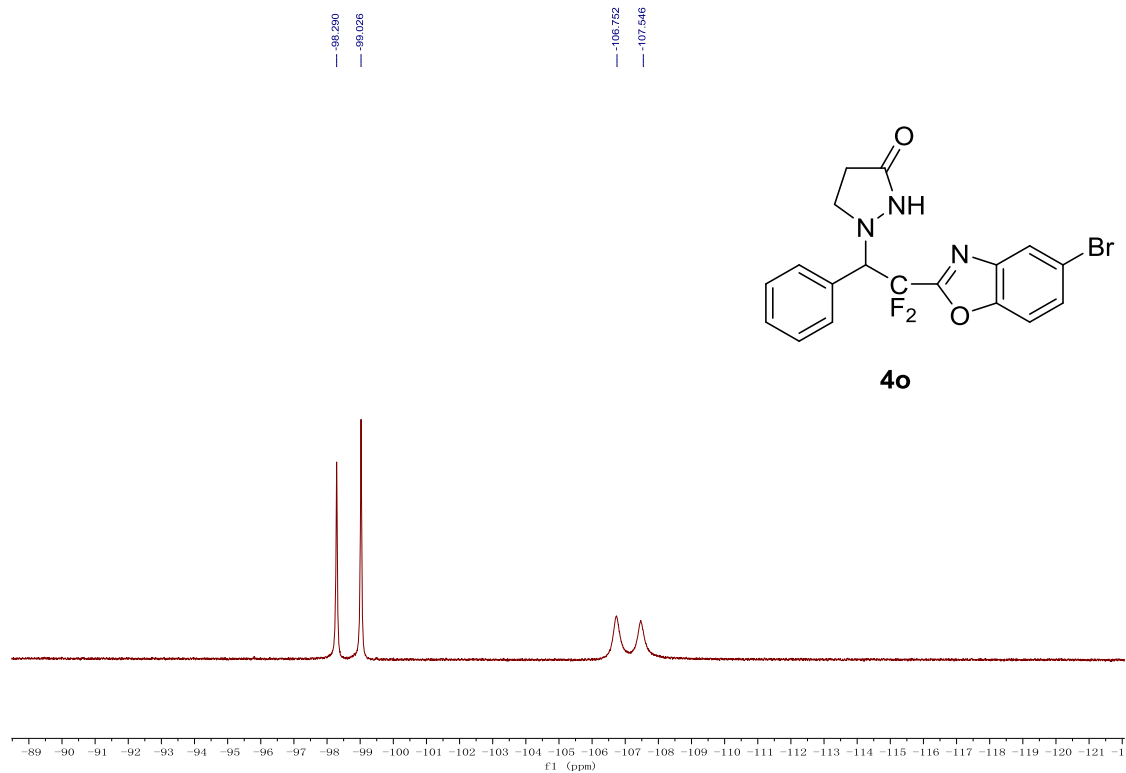

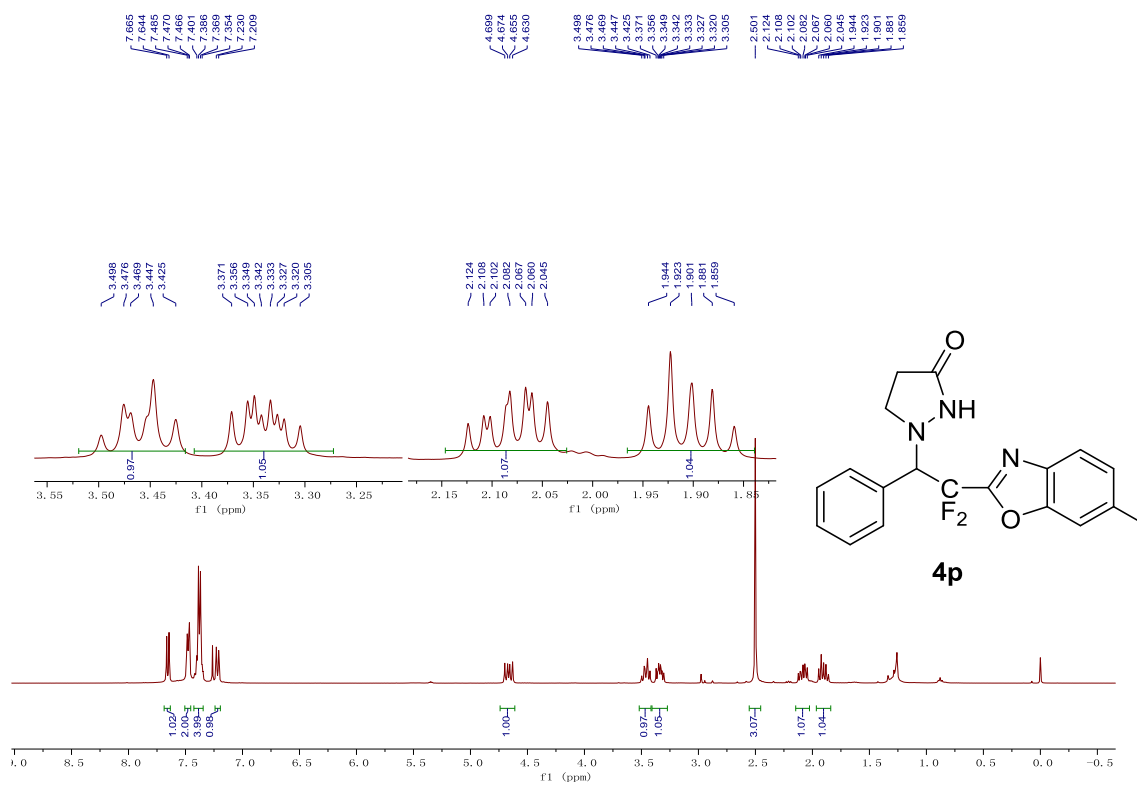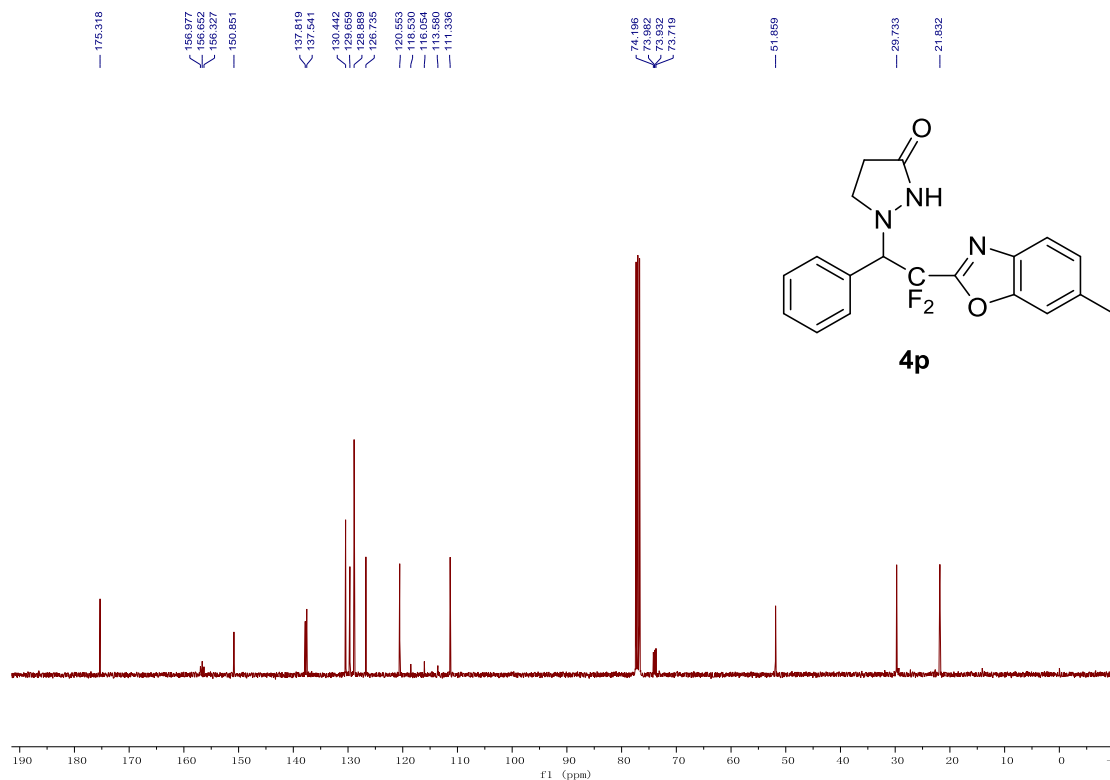

—87.855  
—88.589

—106.005  
—106.735

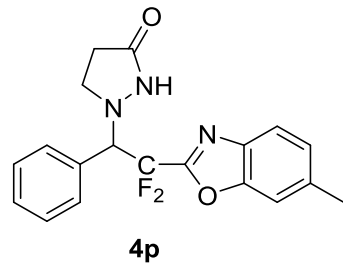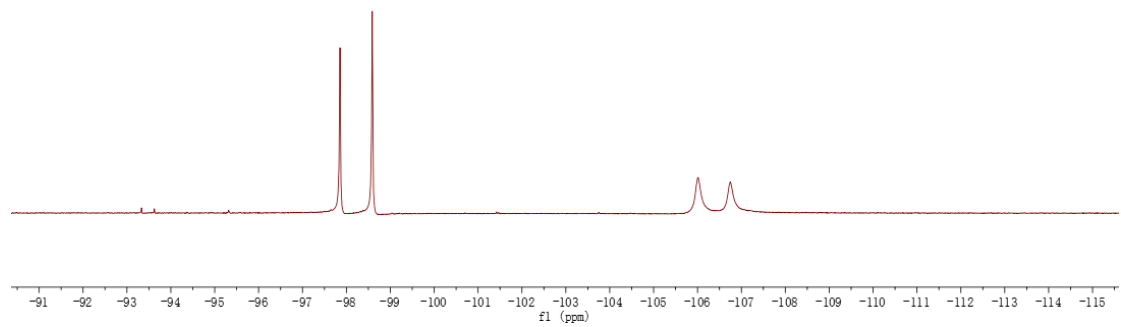

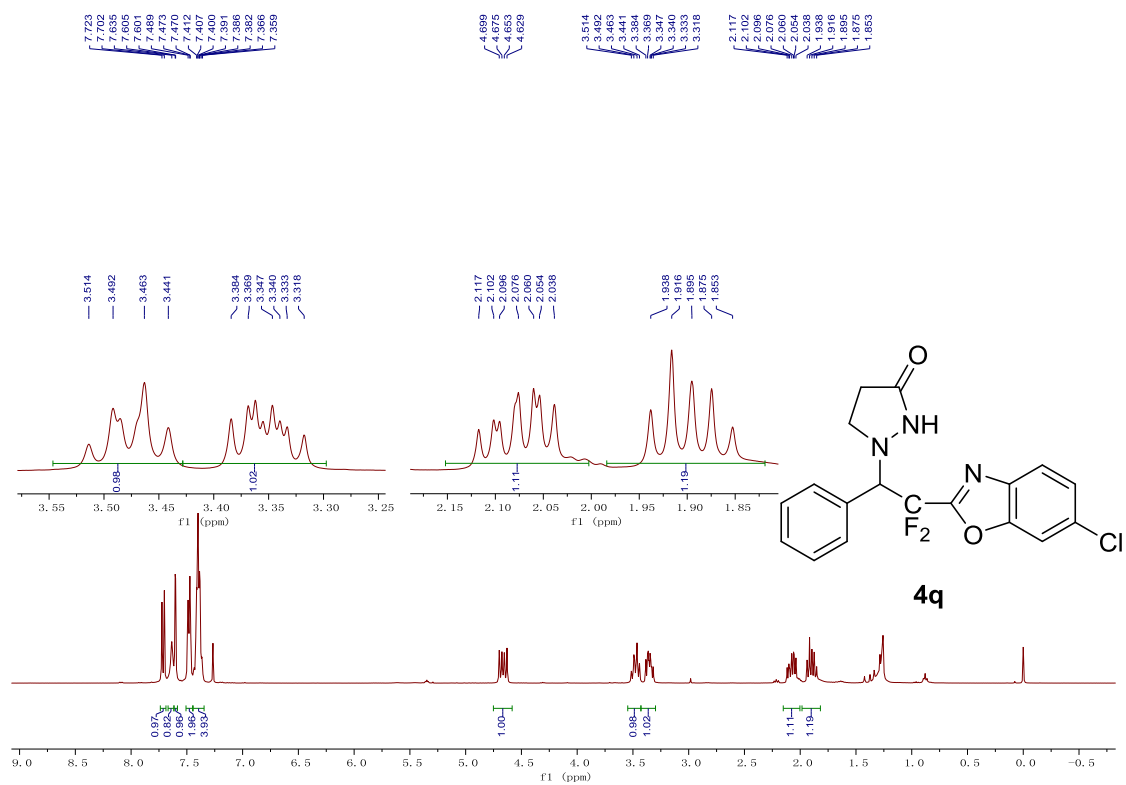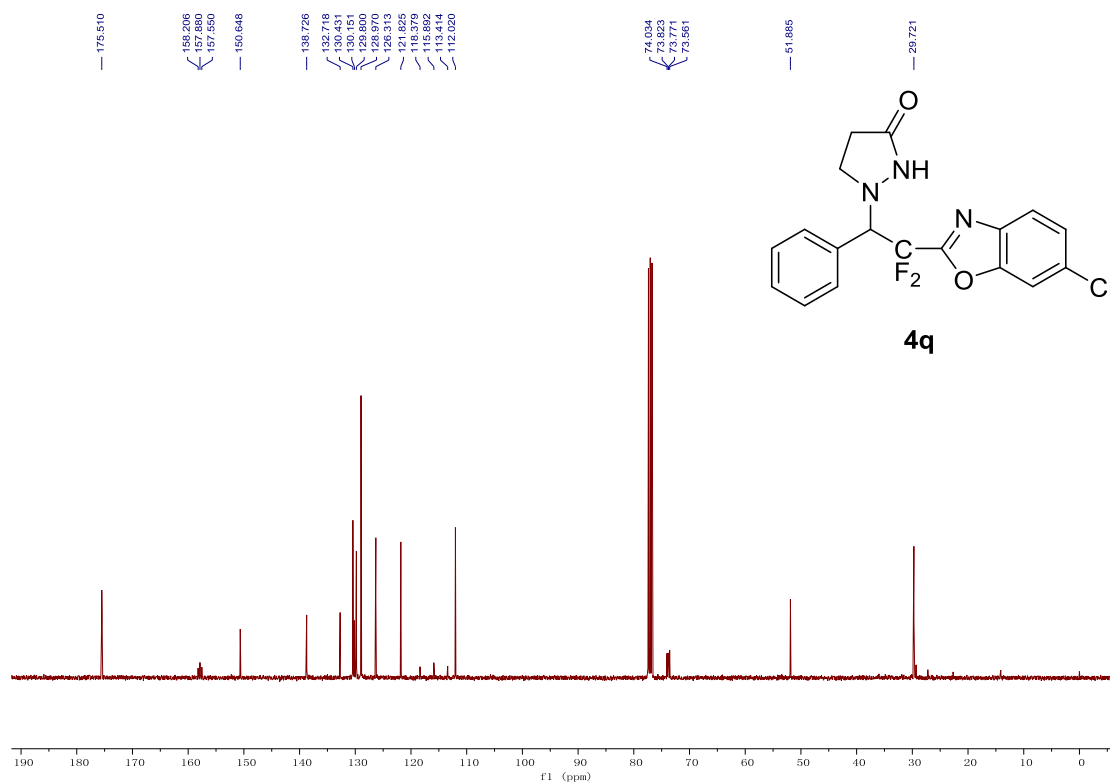



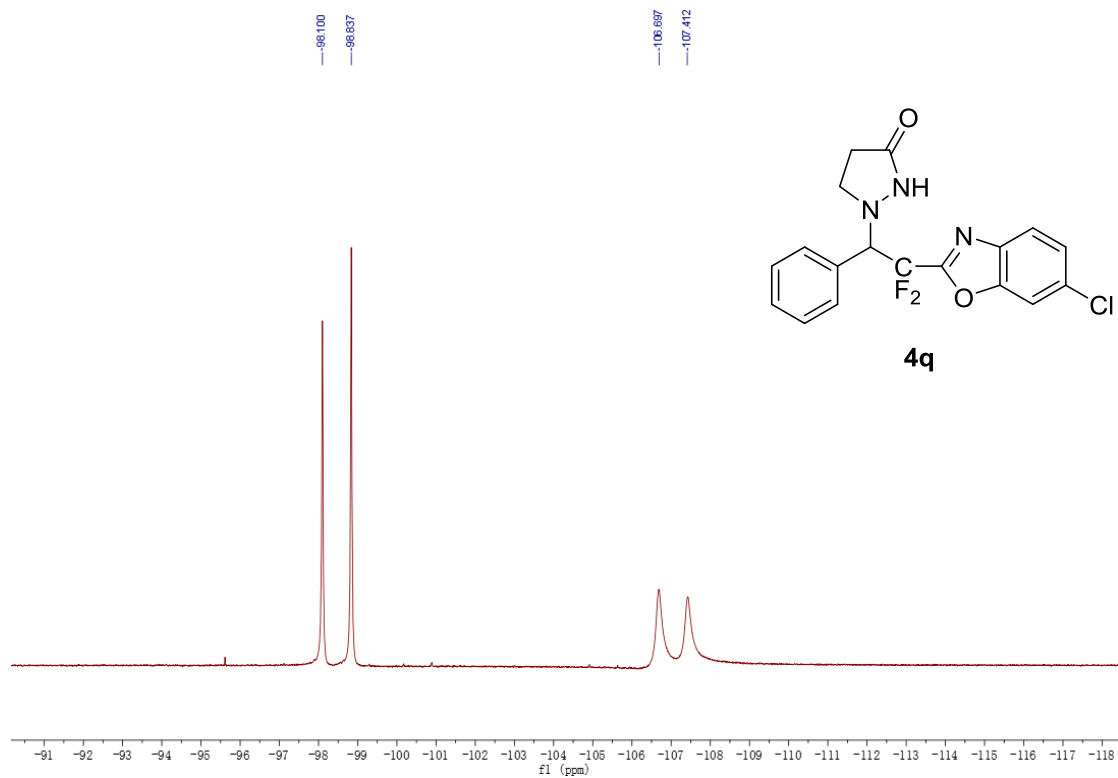



-112.952

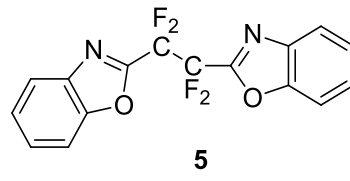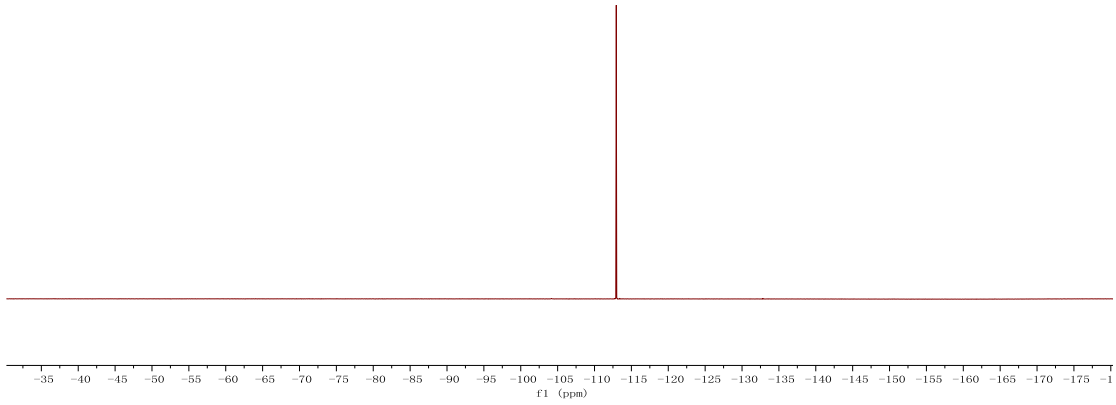

## X-ray crystallographic data of compound

1. X-Ray crystallographic analysis of dispirooxindole-piperazine **3a** (CCDC 1858543) showing the thermal ellipsoids at 30% probability level.

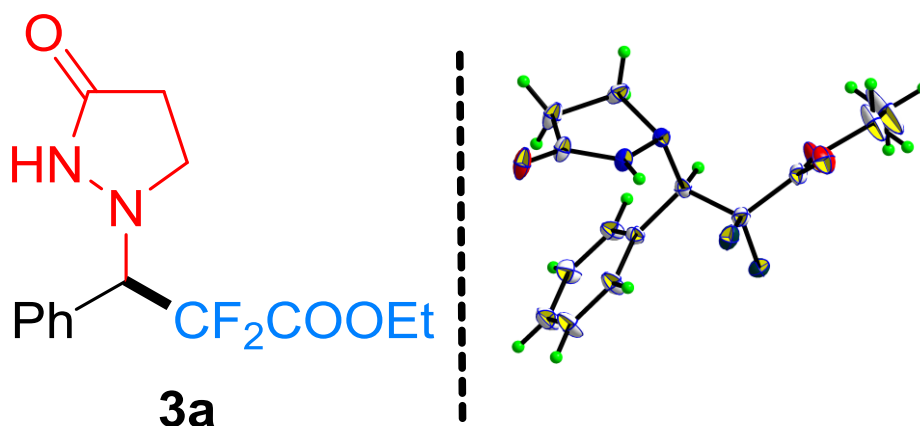

Bond precision: C-C = 0.0037 Å

Wavelength=0.71073

Cell: a=13.8602 (6) b=11.4447 (6) c=9.3074 (4)  
alpha=90 beta=101.885 (1) gamma=90  
Temperature: 293 K

|                        | Calculated       | Reported            |
|------------------------|------------------|---------------------|
| Volume                 | 1444.75 (12)     | 1444.74 (12)        |
| Space group            | P 21/c           | P2 (1) /c           |
| Hall group             | -P 2ybc          | ?                   |
| Moiety formula         | C14 H16 F2 N2 O3 | ?                   |
| Sum formula            | C14 H16 F2 N2 O3 | C13.50 H16 F2 N2 O3 |
| Mr                     | 298.29           | 292.28              |
| Dx, g cm <sup>-3</sup> | 1.371            | 1.344               |
| Z                      | 4                | 4                   |
| Mu (mm <sup>-1</sup> ) | 0.114            | 0.112               |
| F000                   | 624.0            | 612.0               |
| F000'                  | 624.39           |                     |
| h, k, lmax             | 18, 14, 12       | 18, 14, 12          |
| Nref                   | 3323             | 3312                |
| Tmin, Tmax             | 0.973, 0.978     |                     |
| Tmin'                  | 0.967            |                     |

Correction method= Not given

Data completeness= 0.997

Theta (max)= 27.540

R(reflections)= 0.0618 ( 2295)

wR2 (reflections)= 0.1823 ( 3312)

S = 1.029

Npar= 190

2. X-Ray crystallographic analysis of dispirooxindole-piperazine **3v** (CCDC 1858544) showing the thermal ellipsoids at 30% probability level.

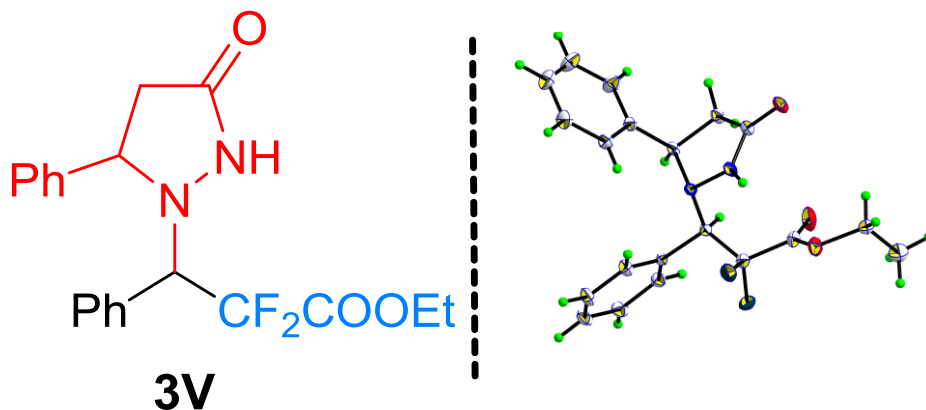

Bond precision: C-C = 0.0036 Å

Wavelength=0.71073

Cell: a=11.6732 (7)

b=16.7833 (11)

c=10.3207 (7)

alpha=90

beta=115.021 (2)

gamma=90

Temperature: 293 K

|                        | Calculated             | Reported         |
|------------------------|------------------------|------------------|
| Volume                 | 1832.2 (2)             | 1832.2 (2)       |
| Space group            | P 21/c                 | P2 (1) /c        |
| Hall group             | -P 2ybc                | ?                |
| Moiety formula         | C19.88 H19.70 F2 N2 O3 | ?                |
| Sum formula            | C19.88 H19.70 F2 N2 O3 | C20 H20 F2 N2 O3 |
| Mr                     | 372.64                 | 374.38           |
| Dx, g cm <sup>-3</sup> | 1.351                  | 1.357            |
| Z                      | 4                      | 4                |
| Mu (mm <sup>-1</sup> ) | 0.105                  | 0.105            |
| F000                   | 779.9                  | 784.0            |
| F000'                  | 780.37                 |                  |
| h, k, lmax             | 15, 21, 13             | 15, 21, 13       |
| Nref                   | 4232                   | 4220             |
| Tmin, Tmax             | 0.975, 0.979           |                  |
| Tmin'                  | 0.969                  |                  |

Correction method= Not given

Data completeness= 0.997

Theta (max)= 27.540

R(reflections)= 0.0656 ( 3156)

wR2(reflections)= 0.1894 ( 4220)

S = 1.055

Npar= 242
